# Supplementary material for: Defining the Rhizobium Leguminosarum Species Complex
Source: Preprints.org preprint supplement (doi:10.20944/preprints202012.0297.v1), 2020-12-12
Supplement: Supplementary file 1 [file Rlc_supplementary_tables.xlsx]

## Sheet: List of tables
Table S1	The 440 genomes of the Rlc and R. anhuiense
Table S2	Genomes assigned to Rhizobium downloaded 25 Jul 2020
Table S3	Genomes with missing bac120 genes
Table S4	Genomes in other genera but assigned to Rhizobium by NCBI (in Fig. 1 phylogeny order)
Table S5	Genomes in other Rhizobium species (in Fig. 1 phylogeny order)
Table S6	Duplicate Rlc genomes (not used)
Table S7	TYGS results for genospecies representative genomes
Table S8	TYGS results for unique genomes
Table S9	16S rRNA alleles
Table S10	16S rRNA variant summary
Table S11	The bac120 protein set from Parks et al. (2017) with Rlc orthologs

## Sheet: Table S1
Sort_order	Strain	Accession	GenBank_taxon	Genospecies	type/representative	GTDB_species	nodCD	Country_of_origin	Isolation_host	Comment/source	file_name
1	CF307	GCF_000799945.1	R._leguminosarum	anhuiense		s__Rhizobium anhuiense	0	USA, Tennessee	Populus root microbiome		R._leguminosarum_CF307_GCF_000799945.1
2	CF286	GCF_000800135.1	R._tropici	anhuiense		s__Rhizobium anhuiense	0	USA, Tennessee	Populus root microbiome		R._tropici_CF286_GCF_000800135.1
3	BK398	GCF_004343265.1	R._sp.	anhuiense		s__Rhizobium anhuiense	0	unspecified	probably from Populus microbiome		R._sp._BK398_BK398_GCF_004343265.1
4	CCBAU_23252	GCF_003985145.1	R._anhuiense	anhuiense	gs type strain	s__Rhizobium anhuiense	viciae	China: Anhui	Vicia faba		R._anhuiense_CCBAU_23252_GCF_003985145.1
5	CCBAU43229	GCF_012276505.1	R._anhuiense	anhuiense			viciae	China	Vicia faba		R._anhuiense_CCBAU43229_GCF_012276505.1
6	S10	GCF_002531655.1	R._anhuiense	anhuiense		s__Rhizobium anhuiense	0	China: Sanjiang, Jiangxi	Phaseolus vulgaris		R._anhuiense_S10_GCF_002531655.1
7	Y27	GCF_002531615.1	R._anhuiense	anhuiense		s__Rhizobium anhuiense	phaseoli	China: Yudu, Jiangxi	Phaseolus vulgaris		R._anhuiense_Y27_GCF_002531615.1
8	JX3	GCF_002531635.1	R._anhuiense	anhuiense		s__Rhizobium anhuiense	phaseoli	China: Jinxian, Jiangxi	Phaseolus vulgaris		R._anhuiense_JX3_GCF_002531635.1
9	C15	GCF_002531695.1	R._anhuiense	anhuiense		s__Rhizobium anhuiense	0	China: Chutan, Jiangxi	Phaseolus vulgaris		R._anhuiense_C15_GCF_002531695.1
10	J3	GCF_002531645.1	R._anhuiense	anhuiense		s__Rhizobium anhuiense	0	China: Jiangkou, Jiangxi	Phaseolus vulgaris		R._anhuiense_J3_GCF_002531645.1
11	WYCCWR10015	GCF_001632995.1	R._anhuiense	anhuiense		s__Rhizobium anhuiense	trifolii	China	Trifolium repens		R._anhuiense_WYCCWR10015_GCF_001632995.1
12	Vaf-46	GCF_001652265.1	R._leguminosarum	L	gs representative	s__Rhizobium leguminosarum_D	viciae	Armenia	Vavilovia formosa		R._leguminosarum_Vaf-46_GCF_001652265.1
13	JHI1093	GCF_010668385.1	R._leguminosarum	L			viciae	UK, JHI, Dundee, Angus	Lathyrus linifolius		R._leguminosarum_JHI1093_GCF_010668385.1
14	JHI1096	GCF_010668355.1	R._leguminosarum	L			viciae	UK, JHI, Dundee, Angus	Lathyrus linifolius		R._leguminosarum_JHI1096_GCF_010668355.1
15	GPTR02	GCF_013004165.1	R._laguerreae	M			trifolii	Spain:Salamanca	Trifolium repens		R._laguerreae_GPTR02_GCF_013004165.1
16	GPTR21	GCF_013004185.1	R._laguerreae	M			trifolii	Spain:Salamanca	Trifolium repens		R._laguerreae_GPTR21_GCF_013004185.1
17	SRDI565	GCF_000371905.1	R._leguminosarum	M	gs representative	s__Rhizobium leguminosarum_I	trifolii	Australia	Trifolium subterraneum	https://doi.org/10.1038/srep16825	R._leguminosarum_SRDI565_GCF_000371905.1
18	GPTR19	GCF_013004175.1	R._laguerreae	M			trifolii	Spain:Salamanca	Trifolium repens		R._laguerreae_GPTR19_GCF_013004175.1
19	GPTR08	GCF_010119525.1	R._laguerreae	M			trifolii	Spain:Salamanca	Trifolium repens		R._laguerreae_GPTR08_GCF_010119525.1
20	GPTR29	GCF_013004155.1	R._laguerreae	M			trifolii	Spain:Salamanca	Trifolium repens		R._laguerreae_GPTR29_GCF_013004155.1
21	SM132	GCF_004304375.1	R._leguminosarum	C		s__Rhizobium leguminosarum_C	trifolii	Denmark: Jutland	Trifolium repens	https://doi.org/10.1099/mgen.0.000351	gsC_R._leguminosarum_SM132_GCF_004304375.1
22	Vh3	GCF_000373325.1	R._leguminosarum	C		s__Rhizobium leguminosarum_C	viciae	UK: York	Vicia hirsuta	https://doi.org/10.1038/srep16825 https://doi.org/10.1111/j.1365-294x.2004.02259.x	R._leguminosarum_Vh3_GCF_000373325.1
23	JHI925	GCF_010668625.1	R._leguminosarum	C			viciae	UK, CSC Conventional, Balruddery Farm, Angus	Vicia faba		R._leguminosarum_JHI925_GCF_010668625.1
24	Lp8	GCF_012276035.1	R._leguminosarum	C			viciae	UK: York	Lathyrus pratensis	https://doi.org/10.1111/j.1365-294x.2004.02259.x	R._leguminosarum_Lp8_GCF_012276035.1
25	Vc2	GCF_000373285.1	R._leguminosarum	C		s__Rhizobium leguminosarum_C	viciae	UK: York	Vicia cracca	https://doi.org/10.1038/srep16825 https://doi.org/10.1111/j.1365-294x.2004.02259.x	R._leguminosarum_Vc2_GCF_000373285.1
26	FRF1H7	GCF_004330625.1	R._leguminosarum	C		s__Rhizobium leguminosarum_C	viciae	France	Vicia faba	https://doi.org/10.1111/nph.16392	R._leguminosarum_FRF1H7_GCF_004330625.1
27	SM92	GCF_004305315.1	R._leguminosarum	C		s__Rhizobium leguminosarum_C	trifolii	France: Brittany	Trifolium repens	https://doi.org/10.1099/mgen.0.000351	gsC_R._leguminosarum_SM92_GCF_004305315.1
28	JHI1422	GCF_010668245.1	R._leguminosarum	C			viciae	UK, Yatesbury House Farm, Avebury, Wilts, Wiltshire	Lens culinaris		R._leguminosarum_JHI1422_GCF_010668245.1
29	SM115	GCF_004304975.1	R._leguminosarum	C		s__Rhizobium leguminosarum_C	trifolii	France: Brittany	Trifolium repens	https://doi.org/10.1099/mgen.0.000351	gsC_R._leguminosarum_SM115_GCF_004304975.1
30	SM133A	GCF_004304585.1	R._leguminosarum	C		s__Rhizobium leguminosarum_C	trifolii	Denmark: Jutland	Trifolium repens	https://doi.org/10.1099/mgen.0.000351	gsC_R._leguminosarum_SM133A_GCF_004304585.1
31	SM97	GCF_004305575.1	R._leguminosarum	C		s__Rhizobium leguminosarum_C	trifolii	France: Brittany	Trifolium repens	https://doi.org/10.1099/mgen.0.000351	gsC_R._leguminosarum_SM97_GCF_004305575.1
32	SM94	GCF_004305375.1	R._leguminosarum	C		s__Rhizobium leguminosarum_C	trifolii	France: Brittany	Trifolium repens	https://doi.org/10.1099/mgen.0.000351	gsC_R._leguminosarum_SM94_GCF_004305375.1
33	SM96	GCF_004305005.1	R._leguminosarum	C		s__Rhizobium leguminosarum_C	trifolii	France: Brittany	Trifolium repens	https://doi.org/10.1099/mgen.0.000351	gsC_R._leguminosarum_SM96_GCF_004305005.1
34	SM113	GCF_004305255.1	R._leguminosarum	C		s__Rhizobium leguminosarum_C	trifolii	France: Brittany	Trifolium repens	https://doi.org/10.1099/mgen.0.000351	gsC_R._leguminosarum_SM113_GCF_004305255.1
35	SM109	GCF_004305085.1	R._leguminosarum	C		s__Rhizobium leguminosarum_C	trifolii	France: Brittany	Trifolium repens	https://doi.org/10.1099/mgen.0.000351	gsC_R._leguminosarum_SM109_GCF_004305085.1
36	SM91	GCF_004304665.1	R._leguminosarum	C		s__Rhizobium leguminosarum_C	trifolii	France: Brittany	Trifolium repens	https://doi.org/10.1099/mgen.0.000351	gsC_R._leguminosarum_SM91_GCF_004304665.1
37	JHI1266	GCF_010668285.1	R._leguminosarum	C			viciae	UK, Weyland Farms (trap soil), Kirkwall, Orkney	Pisum sativum		R._leguminosarum_JHI1266_GCF_010668285.1
38	SM90	GCF_004305475.1	R._leguminosarum	C		s__Rhizobium leguminosarum_C	trifolii	France: Brittany	Trifolium repens	https://doi.org/10.1099/mgen.0.000351	gsC_R._leguminosarum_SM90_GCF_004305475.1
39	SM114	GCF_004305615.1	R._leguminosarum	C		s__Rhizobium leguminosarum_C	trifolii	France: Brittany	Trifolium repens	https://doi.org/10.1099/mgen.0.000351	gsC_R._leguminosarum_SM114_GCF_004305615.1
40	SM85	GCF_004305485.1	R._leguminosarum	C		s__Rhizobium leguminosarum_C	trifolii	France: Brittany	Trifolium repens	https://doi.org/10.1099/mgen.0.000351	gsC_R._leguminosarum_SM85_GCF_004305485.1
41	SM116	GCF_004305025.1	R._leguminosarum	C		s__Rhizobium leguminosarum_C	trifolii	France: Brittany	Trifolium repens	https://doi.org/10.1099/mgen.0.000351	gsC_R._leguminosarum_SM116_GCF_004305025.1
42	SM120	GCF_004304935.1	R._leguminosarum	C		s__Rhizobium leguminosarum_C	trifolii	France: Brittany	Trifolium repens	https://doi.org/10.1099/mgen.0.000351	gsC_R._leguminosarum_SM120_GCF_004304935.1
43	SM168C	GCF_004303135.1	R._leguminosarum	C		s__Rhizobium leguminosarum_C	trifolii	Denmark: Jutland	Trifolium repens	https://doi.org/10.1099/mgen.0.000351	gsC_R._leguminosarum_SM168C_GCF_004303135.1
44	SM151C	GCF_004303995.1	R._leguminosarum	C		s__Rhizobium leguminosarum_C	trifolii	Denmark: Jutland	Trifolium repens	https://doi.org/10.1099/mgen.0.000351	gsC_R._leguminosarum_SM151C_GCF_004303995.1
45	SM166A	GCF_004303455.1	R._leguminosarum	C		s__Rhizobium leguminosarum_C	trifolii	Denmark: Jutland	Trifolium repens	https://doi.org/10.1099/mgen.0.000351	gsC_R._leguminosarum_SM166A_GCF_004303455.1
46	SM147A	GCF_004304035.1	R._leguminosarum	C		s__Rhizobium leguminosarum_C	trifolii	Denmark: Jutland	Trifolium repens	https://doi.org/10.1099/mgen.0.000351	gsC_R._leguminosarum_SM147A_GCF_004304035.1
47	SM147B	GCF_004303885.1	R._leguminosarum	C		s__Rhizobium leguminosarum_C	trifolii	Denmark: Jutland	Trifolium repens	https://doi.org/10.1099/mgen.0.000351	gsC_R._leguminosarum_SM147B_GCF_004303885.1
48	SM147C	GCF_004303815.1	R._leguminosarum	C		s__Rhizobium leguminosarum_C	trifolii	Denmark: Jutland	Trifolium repens	https://doi.org/10.1099/mgen.0.000351	gsC_R._leguminosarum_SM147C_GCF_004303815.1
49	A1	GCA_011128975.2	R._leguminosarum	C			viciae	Russia: Leningrad region	Pisum sativum		R._leguminosarum_A1_GCA_011128975.2
50	JHI953	GCF_010668555.1	R._leguminosarum	C			viciae	UK, CSC Integrated, Balruddery Farm, Angus	Vicia faba		R._leguminosarum_JHI953_GCF_010668555.1
51	SM167	GCF_004303385.1	R._leguminosarum	C		s__Rhizobium leguminosarum_C	trifolii	Denmark: Jutland	Trifolium repens	https://doi.org/10.1099/mgen.0.000351	gsC_R._leguminosarum_SM167_GCF_004303385.1
52	JHI364	GCF_010668825.1	R._leguminosarum	C			viciae	UK, CSC Integrated, Balruddery Farm, Angus	Vicia faba		R._leguminosarum_JHI364_GCF_010668825.1
53	VF2	GCF_010668085.1	R._leguminosarum	C			viciae	UK: York	Vicia faba	https://doi.org/10.1111/j.1365-294x.2004.02259.x	R._leguminosarum_VF2_GCF_010668085.1
54	SM153A	GCF_004303915.1	R._leguminosarum	C		s__Rhizobium leguminosarum_C	trifolii	Denmark: Jutland	Trifolium repens	https://doi.org/10.1099/mgen.0.000351	gsC_R._leguminosarum_SM153A_GCF_004303915.1
55	SM126B	GCF_004304735.1	R._leguminosarum	C		s__Rhizobium leguminosarum_C	trifolii	Denmark: Jutland	Trifolium repens	https://doi.org/10.1099/mgen.0.000351	gsC_R._leguminosarum_SM126B_GCF_004304735.1
56	SM153C	GCF_004303845.1	R._leguminosarum	C		s__Rhizobium leguminosarum_C	trifolii	Denmark: Jutland	Trifolium repens	https://doi.org/10.1099/mgen.0.000351	gsC_R._leguminosarum_SM153C_GCF_004303845.1
57	SM148C	GCF_004304165.1	R._leguminosarum	C		s__Rhizobium leguminosarum_C	trifolii	Denmark: Jutland	Trifolium repens	https://doi.org/10.1099/mgen.0.000351	gsC_R._leguminosarum_SM148C_GCF_004304165.1
58	SM141A	GCF_004304575.1	R._leguminosarum	C		s__Rhizobium leguminosarum_C	trifolii	Denmark: Jutland	Trifolium repens	https://doi.org/10.1099/mgen.0.000351	gsC_R._leguminosarum_SM141A_GCF_004304575.1
59	SM158	GCF_004303575.1	R._leguminosarum	C		s__Rhizobium leguminosarum_C	trifolii	Denmark: Jutland	Trifolium repens	https://doi.org/10.1099/mgen.0.000351	gsC_R._leguminosarum_SM158_GCF_004303575.1
60	SM157A	GCF_004303635.1	R._leguminosarum	C		s__Rhizobium leguminosarum_C	trifolii	Denmark: Jutland	Trifolium repens	https://doi.org/10.1099/mgen.0.000351	gsC_R._leguminosarum_SM157A_GCF_004303635.1
61	SM149B	GCF_004304215.1	R._leguminosarum	C		s__Rhizobium leguminosarum_C	trifolii	Denmark: Jutland	Trifolium repens	https://doi.org/10.1099/mgen.0.000351	gsC_R._leguminosarum_SM149B_GCF_004304215.1
62	SM122A	GCF_004304755.1	R._leguminosarum	C		s__Rhizobium leguminosarum_C	trifolii	Denmark: Jutland	Trifolium repens	https://doi.org/10.1099/mgen.0.000351	gsC_R._leguminosarum_SM122A_GCF_004304755.1
63	SM165B	GCF_004303445.1	R._leguminosarum	C		s__Rhizobium leguminosarum_C	trifolii	Denmark: Jutland	Trifolium repens	https://doi.org/10.1099/mgen.0.000351	gsC_R._leguminosarum_SM165B_GCF_004303445.1
64	SM165A	GCF_004303315.1	R._leguminosarum	C		s__Rhizobium leguminosarum_C	trifolii	Denmark: Jutland	Trifolium repens	https://doi.org/10.1099/mgen.0.000351	gsC_R._leguminosarum_SM165A_GCF_004303315.1
65	SM166B	GCF_004303155.1	R._leguminosarum	C		s__Rhizobium leguminosarum_C	trifolii	Denmark: Jutland	Trifolium repens	https://doi.org/10.1099/mgen.0.000351	gsC_R._leguminosarum_SM166B_GCF_004303155.1
66	SM148B	GCF_004304055.1	R._leguminosarum	C		s__Rhizobium leguminosarum_C	trifolii	Denmark: Jutland	Trifolium repens	https://doi.org/10.1099/mgen.0.000351	gsC_R._leguminosarum_SM148B_GCF_004304055.1
67	SM153D	GCF_004303775.1	R._leguminosarum	C		s__Rhizobium leguminosarum_C	trifolii	Denmark: Jutland	Trifolium repens	https://doi.org/10.1099/mgen.0.000351	gsC_R._leguminosarum_SM153D_GCF_004303775.1
68	SM157B	GCF_004303615.1	R._leguminosarum	C		s__Rhizobium leguminosarum_C	trifolii	Denmark: Jutland	Trifolium repens	https://doi.org/10.1099/mgen.0.000351	gsC_R._leguminosarum_SM157B_GCF_004303615.1
69	SM157C	GCF_004303335.1	R._leguminosarum	C		s__Rhizobium leguminosarum_C	trifolii	Denmark: Jutland	Trifolium repens	https://doi.org/10.1099/mgen.0.000351	gsC_R._leguminosarum_SM157C_GCF_004303335.1
70	SM148A	GCF_004303685.1	R._leguminosarum	C		s__Rhizobium leguminosarum_C	trifolii	Denmark: Jutland	Trifolium repens	https://doi.org/10.1099/mgen.0.000351	gsC_R._leguminosarum_SM148A_GCF_004303685.1
71	SM149C	GCF_004304125.1	R._leguminosarum	C		s__Rhizobium leguminosarum_C	trifolii	Denmark: Jutland	Trifolium repens	https://doi.org/10.1099/mgen.0.000351	gsC_R._leguminosarum_SM149C_GCF_004304125.1
72	SM134A	GCF_004304255.1	R._leguminosarum	C		s__Rhizobium leguminosarum_C	trifolii	Denmark: Jutland	Trifolium repens	https://doi.org/10.1099/mgen.0.000351	gsC_R._leguminosarum_SM134A_GCF_004304255.1
73	SM134B	GCF_004304235.1	R._leguminosarum	C		s__Rhizobium leguminosarum_C	trifolii	Denmark: Jutland	Trifolium repens	https://doi.org/10.1099/mgen.0.000351	gsC_R._leguminosarum_SM134B_GCF_004304235.1
74	SM143	GCF_004304645.1	R._leguminosarum	C		s__Rhizobium leguminosarum_C	trifolii	Denmark: Jutland	Trifolium repens	https://doi.org/10.1099/mgen.0.000351	gsC_R._leguminosarum_SM143_GCF_004304645.1
75	SM164A	GCF_004303525.1	R._leguminosarum	C		s__Rhizobium leguminosarum_C	trifolii	Denmark: Jutland	Trifolium repens	https://doi.org/10.1099/mgen.0.000351	gsC_R._leguminosarum_SM164A_GCF_004303525.1
76	SM164C	GCF_004303425.1	R._leguminosarum	C		s__Rhizobium leguminosarum_C	trifolii	Denmark: Jutland	Trifolium repens	https://doi.org/10.1099/mgen.0.000351	gsC_R._leguminosarum_SM164C_GCF_004303425.1
77	UPM1133	GCF_012349115.1	R._ruizarguesonis	C	gs type strain		viciae	Italy	Pisum sativum	https://doi.org/10.1016/j.syapm.2020.126090	R._ruizarguesonis_UPM1133_GCF_012349115.1
78	UPM1135	GCF_012412905.1	R._ruizarguesonis	C			viciae	Germany: Stuttgart	Pisum sativum	https://doi.org/10.1016/j.syapm.2020.126090	R._ruizarguesonis_UPM1135_GCF_012412905.1
79	UPM1132	GCF_012349105.1	R._ruizarguesonis	C			viciae	Italy	Pisum sativum	https://doi.org/10.1016/j.syapm.2020.126090	R._ruizarguesonis_UPM1132_GCF_012349105.1
80	UPM1134	GCF_012349085.1	R._ruizarguesonis	C			viciae	Italy	Pisum sativum	https://doi.org/10.1016/j.syapm.2020.126090	R._ruizarguesonis_UPM1134_GCF_012349085.1
81	JHI782	GCF_010668685.1	R._leguminosarum	C			viciae	Greece: Commercial inoculum; Mykonos (near Psarou)	Vicia faba		R._leguminosarum_JHI782_GCF_010668685.1
82	JHI783	GCF_010668665.1	R._leguminosarum	C			viciae	UK, rcr1045; Rothamsted Rhizobium Collection	Pisum sativum		R._leguminosarum_JHI783_GCF_010668665.1
83	SM103	GCF_004305395.1	R._leguminosarum	C		s__Rhizobium leguminosarum_C	trifolii	France: Brittany	Trifolium repens	https://doi.org/10.1099/mgen.0.000351	gsC_R._leguminosarum_SM103_GCF_004305395.1
84	JHI367	GCF_010668835.1	R._leguminosarum	C			viciae	UK, CSC Conventional, Balruddery Farm, Angus	Vicia faba		R._leguminosarum_JHI367_GCF_010668835.1
85	SM108	GCF_004305105.1	R._leguminosarum	C		s__Rhizobium leguminosarum_C	trifolii	France: Brittany	Trifolium repens	https://doi.org/10.1099/mgen.0.000351	gsC_R._leguminosarum_SM108_GCF_004305105.1
86	SM95	GCF_004305145.1	R._leguminosarum	C		s__Rhizobium leguminosarum_C	trifolii	France: Brittany	Trifolium repens	https://doi.org/10.1099/mgen.0.000351	gsC_R._leguminosarum_SM95_GCF_004305145.1
87	SM105	GCF_004305365.1	R._leguminosarum	C		s__Rhizobium leguminosarum_C	trifolii	France: Brittany	Trifolium repens	https://doi.org/10.1099/mgen.0.000351	gsC_R._leguminosarum_SM105_GCF_004305365.1
88	SM87	GCF_004305495.1	R._leguminosarum	C		s__Rhizobium leguminosarum_C	trifolii	France: Brittany	Trifolium repens	https://doi.org/10.1099/mgen.0.000351	gsC_R._leguminosarum_SM87_GCF_004305495.1
89	SM161	GCF_004303545.1	R._leguminosarum	C		s__Rhizobium leguminosarum_C	trifolii	Denmark: Jutland	Trifolium repens	https://doi.org/10.1099/mgen.0.000351	gsC_R._leguminosarum_SM161_GCF_004303545.1
90	SM88	GCF_004305605.1	R._leguminosarum	C		s__Rhizobium leguminosarum_C	trifolii	France: Brittany	Trifolium repens	https://doi.org/10.1099/mgen.0.000351	gsC_R._leguminosarum_SM88_GCF_004305605.1
91	SM112	GCF_004304745.1	R._leguminosarum	C		s__Rhizobium leguminosarum_C	trifolii	France: Brittany	Trifolium repens	https://doi.org/10.1099/mgen.0.000351	gsC_R._leguminosarum_SM112_GCF_004304745.1
92	SM119	GCF_004304955.1	R._leguminosarum	C		s__Rhizobium leguminosarum_C	trifolii	France: Brittany	Trifolium repens	https://doi.org/10.1099/mgen.0.000351	gsC_R._leguminosarum_SM119_GCF_004304955.1
93	JHI42	GCF_010668865.1	R._leguminosarum	C			viciae	UK, Monifieth, Angus	Vicia lutea		R._leguminosarum_JHI42_GCF_010668865.1
94	Ps8	GCF_000375705.1	R._leguminosarum	C		s__Rhizobium leguminosarum_C	viciae	UK: York	Pisum sativum	https://doi.org/10.1111/j.1365-294x.2004.02259.x	R._leguminosarum_Ps8_GCF_000375705.1
95	JHI1418	GCF_010668275.1	R._leguminosarum	C			viciae	UK, Yatesbury House Farm, Avebury, Wilts, Wiltshire	Lens culinaris		R._leguminosarum_JHI1418_GCF_010668275.1
96	JHI979	GCF_010668465.1	R._leguminosarum	C			viciae	UK, CSC Conventional, Balruddery Farm (trap soil), Angus	Pisum sativum		R._leguminosarum_JHI979_GCF_010668465.1
97	JHI1259	GCF_010668315.1	R._leguminosarum	C			viciae	UK, Weyland Farms (trap soil), Kirkwall, Orkney	Pisum sativum		R._leguminosarum_JHI1259_GCF_010668315.1
98	SM100	GCF_004305515.1	R._leguminosarum	C		s__Rhizobium leguminosarum_C	trifolii	France: Brittany	Trifolium repens	https://doi.org/10.1099/mgen.0.000351	gsC_R._leguminosarum_SM100_GCF_004305515.1
99	JHI1442	GCF_010668215.1	R._leguminosarum	C			viciae	UK, Weyland Farms, Kirkwall, Orkney	Pisum sativum		R._leguminosarum_JHI1442_GCF_010668215.1
100	TA1	GCF_000430465.3	R._leguminosarum	C			trifolii	Australia	Trifolium subterraneum	https://doi.org/10.1094/MPMI-08-20-0220-A	R._leguminosarum_TA1_GCF_000430465.3
101	SM101	GCF_004305545.1	R._leguminosarum	C		s__Rhizobium leguminosarum_C	trifolii	France: Brittany	Trifolium repens	https://doi.org/10.1099/mgen.0.000351	gsC_R._leguminosarum_SM101_GCF_004305545.1
102	RCAM2802	GCA_014189655.1	R._leguminosarum	C			viciae	Russia: St.Petersburg	Lathyrus sativus		R._leguminosarum_RCAM2802_GCA_014189655.1
103	SM122B	GCF_004305265.1	R._leguminosarum	C		s__Rhizobium leguminosarum_C	trifolii	Denmark: Jutland	Trifolium repens	https://doi.org/10.1099/mgen.0.000351	gsC_R._leguminosarum_SM122B_GCF_004305265.1
104	SM84	GCF_004306055.1	R._leguminosarum	C		s__Rhizobium leguminosarum_C	trifolii	France: Brittany	Trifolium repens	https://doi.org/10.1099/mgen.0.000351	gsC_R._leguminosarum_SM84_GCF_004306055.1
105	SM89	GCF_004305305.1	R._leguminosarum	C		s__Rhizobium leguminosarum_C	trifolii	France: Brittany	Trifolium repens	https://doi.org/10.1099/mgen.0.000351	gsC_R._leguminosarum_SM89_GCF_004305305.1
106	SM117	GCF_004305595.1	R._leguminosarum	C		s__Rhizobium leguminosarum_C	trifolii	France: Brittany	Trifolium repens	https://doi.org/10.1099/mgen.0.000351	gsC_R._leguminosarum_SM117_GCF_004305595.1
107	SM86	GCF_004305175.1	R._leguminosarum	C		s__Rhizobium leguminosarum_C	0	France: Brittany	Trifolium repens	https://doi.org/10.1099/mgen.0.000351	gsC_R._leguminosarum_SM86_GCF_004305175.1
108	SM98	GCF_004305075.1	R._leguminosarum	C		s__Rhizobium leguminosarum_C	trifolii	France: Brittany	Trifolium repens	https://doi.org/10.1099/mgen.0.000351	gsC_R._leguminosarum_SM98_GCF_004305075.1
109	SM111	GCF_004305195.1	R._leguminosarum	C		s__Rhizobium leguminosarum_C	trifolii	France: Brittany	Trifolium repens	https://doi.org/10.1099/mgen.0.000351	gsC_R._leguminosarum_SM111_GCF_004305195.1
110	SM104	GCF_004304775.1	R._leguminosarum	C		s__Rhizobium leguminosarum_C	trifolii	France: Brittany	Trifolium repens	https://doi.org/10.1099/mgen.0.000351	gsC_R._leguminosarum_SM104_GCF_004304775.1
111	SM107	GCF_004305095.1	R._leguminosarum	C		s__Rhizobium leguminosarum_C	trifolii	France: Brittany	Trifolium repens	https://doi.org/10.1099/mgen.0.000351	gsC_R._leguminosarum_SM107_GCF_004305095.1
112	SM81	GCF_004305685.1	R._leguminosarum	C		s__Rhizobium leguminosarum_C	trifolii	France: Brittany	Trifolium repens	https://doi.org/10.1099/mgen.0.000351	gsC_R._leguminosarum_SM81_GCF_004305685.1
113	SM129	GCF_004304465.1	R._leguminosarum	C		s__Rhizobium leguminosarum_C	trifolii	Denmark: Jutland	Trifolium repens	https://doi.org/10.1099/mgen.0.000351	gsC_R._leguminosarum_SM129_GCF_004304465.1
114	SM99B	GCF_004305435.1	R._leguminosarum	C		s__Rhizobium leguminosarum_C	trifolii	France: Brittany	Trifolium repens	https://doi.org/10.1099/mgen.0.000351	gsC_R._leguminosarum_SM99B_GCF_004305435.1
115	SM133B	GCF_004304435.1	R._leguminosarum	C		s__Rhizobium leguminosarum_C	trifolii	Denmark: Jutland	Trifolium repens	https://doi.org/10.1099/mgen.0.000351	gsC_R._leguminosarum_SM133B_GCF_004304435.1
116	SM110	GCF_004305235.1	R._leguminosarum	C		s__Rhizobium leguminosarum_C	trifolii	France: Brittany	Trifolium repens	https://doi.org/10.1099/mgen.0.000351	gsC_R._leguminosarum_SM110_GCF_004305235.1
117	SM170C	GCF_004303145.1	R._leguminosarum	C		s__Rhizobium leguminosarum_C	trifolii	Denmark: Jutland	Trifolium repens	https://doi.org/10.1099/mgen.0.000351	gsC_R._leguminosarum_SM170C_GCF_004303145.1
118	SM170A	GCF_004303115.1	R._leguminosarum	C		s__Rhizobium leguminosarum_C	trifolii	Denmark: Jutland	Trifolium repens	https://doi.org/10.1099/mgen.0.000351	gsC_R._leguminosarum_SM170A_GCF_004303115.1
119	SM121A	GCF_004305455.1	R._leguminosarum	C		s__Rhizobium leguminosarum_C	trifolii	Denmark: Jutland	Trifolium repens	https://doi.org/10.1099/mgen.0.000351	gsC_R._leguminosarum_SM121A_GCF_004305455.1
120	SM121B	GCF_004304885.1	R._leguminosarum	C		s__Rhizobium leguminosarum_C	trifolii	Denmark: Jutland	Trifolium repens	https://doi.org/10.1099/mgen.0.000351	gsC_R._leguminosarum_SM121B_GCF_004304885.1
121	SM48	GCF_004305825.1	R._leguminosarum	C		s__Rhizobium leguminosarum_C	trifolii	Denmark: Zealand	Trifolium repens	https://doi.org/10.1099/mgen.0.000351	gsC_R._leguminosarum_SM48_GCF_004305825.1
122	SM83	GCF_004304855.1	R._leguminosarum	C		s__Rhizobium leguminosarum_C	trifolii	France: Brittany	Trifolium repens	https://doi.org/10.1099/mgen.0.000351	gsC_R._leguminosarum_SM83_GCF_004304855.1
123	SM93	GCF_004305295.1	R._leguminosarum	C		s__Rhizobium leguminosarum_C	trifolii	France: Brittany	Trifolium repens	https://doi.org/10.1099/mgen.0.000351	gsC_R._leguminosarum_SM93_GCF_004305295.1
124	RCAM_1026	GCF_001927265.1	R._leguminosarum	C		s__Rhizobium leguminosarum_C	viciae	Kazakhstan: Kostanay Region	Pisum sativum		R._leguminosarum_RCAM_1026_GCF_001927265.1
125	JHI24	GCF_010668905.1	R._leguminosarum	C			viciae	UK, Living Field Garden, JHI, Dundee, Angus	Vicia tetrasperma		R._leguminosarum_JHI24_GCF_010668905.1
126	JHI787	GCF_010668635.1	R._leguminosarum	C			viciae	Ethiopia, Enemay	Vicia faba		R._leguminosarum_JHI787_GCF_010668635.1
127	SM49	GCF_004306285.1	R._leguminosarum	C		s__Rhizobium leguminosarum_C	trifolii	Denmark: Zealand	Trifolium repens	https://doi.org/10.1099/mgen.0.000351	gsC_R._leguminosarum_SM49_GCF_004306285.1
128	SM47	GCF_004305895.1	R._leguminosarum	C		s__Rhizobium leguminosarum_C	trifolii	Denmark: Zealand	Trifolium repens	https://doi.org/10.1099/mgen.0.000351	gsC_R._leguminosarum_SM47_GCF_004305895.1
129	SM60	GCF_004306185.1	R._leguminosarum	C		s__Rhizobium leguminosarum_C	trifolii	Denmark: Zealand	Trifolium repens	https://doi.org/10.1099/mgen.0.000351	gsC_R._leguminosarum_SM60_GCF_004306185.1
130	L116	GCF_012276295.1	R._leguminosarum	C			viciae	France	Lens culinaris		R._leguminosarum_L116_GCF_012276295.1
131	SM102	GCF_004304905.1	R._leguminosarum	C		s__Rhizobium leguminosarum_C	trifolii	France: Brittany	Trifolium repens	https://doi.org/10.1099/mgen.0.000351	gsC_R._leguminosarum_SM102_GCF_004304905.1
132	SM106	GCF_004305185.1	R._leguminosarum	C		s__Rhizobium leguminosarum_C	trifolii	France: Brittany	Trifolium repens	https://doi.org/10.1099/mgen.0.000351	gsC_R._leguminosarum_SM106_GCF_004305185.1
133	SEF5C12	GCF_004329975.1	R._leguminosarum	C		s__Rhizobium leguminosarum_C	viciae	Sweden	Vicia faba	https://doi.org/10.1111/nph.16392	R._leguminosarum_SEF5C12_GCF_004329975.1
134	GB29	GCF_012276435.1	R._leguminosarum	C			viciae	Poland	Pisum sativum		R._leguminosarum_GB29_GCF_012276435.1
135	JHI788	GCF_010668585.1	R._leguminosarum	C			viciae	UK, Jedburgh, Roxburghshire	Vicia faba		R._leguminosarum_JHI788_GCF_010668585.1
136	CZP2H1	GCF_004330815.1	R._leguminosarum	C		s__Rhizobium leguminosarum_C	viciae	Czach Republic	Pisum sativum	https://doi.org/10.1111/nph.16392	R._leguminosarum_CZP2H1_GCF_004330815.1
137	CZF1B5	GCF_004330975.1	R._leguminosarum	C		s__Rhizobium leguminosarum_C	viciae	Czach Republic	Vicia faba	https://doi.org/10.1111/nph.16392	R._leguminosarum_CZF1B5_GCF_004330975.1
138	GB30	GCF_000419745.1	R._leguminosarum	C		s__Rhizobium leguminosarum_C	viciae	Poland	Pisum sativum	https://doi.org/10.1038/srep16825	R._leguminosarum_GB30_GCF_000419745.1
139	P2.5	GCF_012275925.1	R._leguminosarum	C			viciae	Poland	Pisum sativum		R._leguminosarum_P2.5_GCF_012275925.1
140	JHI1592	GCF_010668145.1	R._leguminosarum	C			viciae	UK, Skye	Pisum sativum		R._leguminosarum_JHI1592_GCF_010668145.1
141	CZF5B4	GCF_004330955.1	R._leguminosarum	C		s__Rhizobium leguminosarum_C	viciae	Czach Republic	Vicia faba	https://doi.org/10.1111/nph.16392	R._leguminosarum_CZF5B4_GCF_004330955.1
142	CZF5G8	GCF_004330945.1	R._leguminosarum	C		s__Rhizobium leguminosarum_C	viciae	Czach Republic	Vicia faba	https://doi.org/10.1111/nph.16392	R._leguminosarum_CZF5G8_GCF_004330945.1
143	JHI388	GCF_010668735.1	R._leguminosarum	C			viciae	UK, CSC Conventional, Balruddery Farm, Angus	Vicia faba		R._leguminosarum_JHI388_GCF_010668735.1
144	JHI1253	GCF_010668345.1	R._leguminosarum	C			viciae	UK, Weyland Farms (trap soil), Kirkwall, Orkney	Pisum sativum		R._leguminosarum_JHI1253_GCF_010668345.1
145	JHI370	GCF_010668785.1	R._leguminosarum	C			viciae	UK, CSC Conventional, Balruddery Farm, Angus	Vicia faba		R._leguminosarum_JHI370_GCF_010668785.1
146	JHI387	GCF_010668765.1	R._leguminosarum	C			viciae	UK, CSC Conventional, Balruddery Farm, Angus	Vicia faba		R._leguminosarum_JHI387_GCF_010668765.1
147	CZP3H6	GCF_004330725.1	R._leguminosarum	C		s__Rhizobium leguminosarum_C	viciae	Czach Republic	Pisum sativum	https://doi.org/10.1111/nph.16392	R._leguminosarum_CZP3H6_GCF_004330725.1
148	SM71	GCF_004306385.1	R._leguminosarum	C		s__Rhizobium leguminosarum_C	trifolii	Denmark: Zealand	Trifolium repens	https://doi.org/10.1099/mgen.0.000351	gsC_R._leguminosarum_SM71_GCF_004306385.1
149	SM73	GCF_004305795.1	R._leguminosarum	C		s__Rhizobium leguminosarum_C	trifolii	Denmark: Zealand	Trifolium repens	https://doi.org/10.1099/mgen.0.000351	gsC_R._leguminosarum_SM73_GCF_004305795.1
150	SM125	GCF_004304835.1	R._leguminosarum	C		s__Rhizobium leguminosarum_C	trifolii	Denmark: Jutland	Trifolium repens	https://doi.org/10.1099/mgen.0.000351	gsC_R._leguminosarum_SM125_GCF_004304835.1
151	SM170B	GCF_004303245.1	R._leguminosarum	C		s__Rhizobium leguminosarum_C	trifolii	Denmark: Jutland	Trifolium repens	https://doi.org/10.1099/mgen.0.000351	gsC_R._leguminosarum_SM170B_GCF_004303245.1
152	SM74	GCF_004306305.1	R._leguminosarum	C		s__Rhizobium leguminosarum_C	trifolii	Denmark: Zealand	Trifolium repens	https://doi.org/10.1099/mgen.0.000351	gsC_R._leguminosarum_SM74_GCF_004306305.1
153	SM42	GCF_004306325.1	R._leguminosarum	C		s__Rhizobium leguminosarum_C	trifolii	Denmark: Zealand	Trifolium repens	https://doi.org/10.1099/mgen.0.000351	gsC_R._leguminosarum_SM42_GCF_004306325.1
154	SM56	GCF_004306705.1	R._leguminosarum	C		s__Rhizobium leguminosarum_C	trifolii	Denmark: Zealand	Trifolium repens	https://doi.org/10.1099/mgen.0.000351	gsC_R._leguminosarum_SM56_GCF_004306705.1
155	SM57	GCF_004306695.1	R._leguminosarum	C		s__Rhizobium leguminosarum_C	trifolii	Denmark: Zealand	Trifolium repens	https://doi.org/10.1099/mgen.0.000351	gsC_R._leguminosarum_SM57_GCF_004306695.1
156	SM59	GCF_004306245.1	R._leguminosarum	C		s__Rhizobium leguminosarum_C	trifolii	Denmark: Zealand	Trifolium repens	https://doi.org/10.1099/mgen.0.000351	gsC_R._leguminosarum_SM59_GCF_004306245.1
157	SM44	GCF_004306495.1	R._leguminosarum	C		s__Rhizobium leguminosarum_C	trifolii	Denmark: Zealand	Trifolium repens	https://doi.org/10.1099/mgen.0.000351	gsC_R._leguminosarum_SM44_GCF_004306495.1
158	SM67	GCF_004306615.1	R._leguminosarum	C		s__Rhizobium leguminosarum_C	trifolii	Denmark: Zealand	Trifolium repens	https://doi.org/10.1099/mgen.0.000351	gsC_R._leguminosarum_SM67_GCF_004306615.1
159	SM68	GCF_004306485.1	R._leguminosarum	C		s__Rhizobium leguminosarum_C	trifolii	Denmark: Zealand	Trifolium repens	https://doi.org/10.1099/mgen.0.000351	gsC_R._leguminosarum_SM68_GCF_004306485.1
160	SM82	GCF_004306075.1	R._leguminosarum	C		s__Rhizobium leguminosarum_C	trifolii	France: Brittany	Trifolium repens	https://doi.org/10.1099/mgen.0.000351	gsC_R._leguminosarum_SM82_GCF_004306075.1
161	SM54	GCF_004305915.1	R._leguminosarum	C		s__Rhizobium leguminosarum_C	trifolii	Denmark: Zealand	Trifolium repens	https://doi.org/10.1099/mgen.0.000351	gsC_R._leguminosarum_SM54_GCF_004305915.1
162	SM80	GCF_004305765.1	R._leguminosarum	C		s__Rhizobium leguminosarum_C	trifolii	Denmark: Zealand	Trifolium repens	https://doi.org/10.1099/mgen.0.000351	gsC_R._leguminosarum_SM80_GCF_004305765.1
163	SM150	GCF_004304105.1	R._leguminosarum	C		s__Rhizobium leguminosarum_C	trifolii	Denmark: Jutland	Trifolium repens	https://doi.org/10.1099/mgen.0.000351	gsC_R._leguminosarum_SM150_GCF_004304105.1
164	SEF4H7	GCF_004329995.1	R._leguminosarum	C		s__Rhizobium leguminosarum_C	viciae	Sweden	Vicia faba	https://doi.org/10.1111/nph.16392	R._leguminosarum_SEF4H7_GCF_004329995.1
165	SM53	GCF_004306365.1	R._leguminosarum	C		s__Rhizobium leguminosarum_C	trifolii	Denmark: Zealand	Trifolium repens	https://doi.org/10.1099/mgen.0.000351	gsC_R._leguminosarum_SM53_GCF_004306365.1
166	SM43	GCF_004306775.1	R._leguminosarum	C		s__Rhizobium leguminosarum_C	trifolii	Denmark: Zealand	Trifolium repens	https://doi.org/10.1099/mgen.0.000351	gsC_R._leguminosarum_SM43_GCF_004306775.1
167	SM58	GCF_004305715.1	R._leguminosarum	C		s__Rhizobium leguminosarum_C	trifolii	Denmark: Zealand	Trifolium repens	https://doi.org/10.1099/mgen.0.000351	gsC_R._leguminosarum_SM58_GCF_004305715.1
168	CZP2D2	GCF_004330835.1	R._leguminosarum	C		s__Rhizobium leguminosarum_C	viciae	Czach Republic	Pisum sativum	https://doi.org/10.1111/nph.16392	R._leguminosarum_CZP2D2_GCF_004330835.1
169	RCAM0626	GCA_014189575.1	R._leguminosarum	C			viciae	Russia: St.Petersburg	Vicia sativa		R._leguminosarum_RCAM0626_GCA_014189575.1
170	31B	GCF_011604465.1	R._leguminosarum	C			trifolii	Russia: Leningrad region	Trifolium pratense		R._leguminosarum_31B_GCF_011604465.1
171	SM137A	GCF_004304265.1	R._leguminosarum	C		s__Rhizobium leguminosarum_C	trifolii	Denmark: Jutland	Trifolium repens	https://doi.org/10.1099/mgen.0.000351	gsC_R._leguminosarum_SM137A_GCF_004304265.1
172	SM118	GCF_004304965.1	R._leguminosarum	C		s__Rhizobium leguminosarum_C	trifolii	France: Brittany	Trifolium repens	https://doi.org/10.1099/mgen.0.000351	gsC_R._leguminosarum_SM118_GCF_004304965.1
173	SEF4B9	GCF_004330015.1	R._leguminosarum	C		s__Rhizobium leguminosarum_C	viciae	Sweden	Vicia faba	https://doi.org/10.1111/nph.16392	R._leguminosarum_SEF4B9_GCF_004330015.1
174	VF5	GCF_010668055.1	R._leguminosarum	C			viciae	UK: York	Vicia faba	https://doi.org/10.1111/j.1365-294x.2004.02259.x	R._leguminosarum_VF5_GCF_010668055.1
175	SM55	GCF_004306675.1	R._leguminosarum	C		s__Rhizobium leguminosarum_C	trifolii	Denmark: Zealand	Trifolium repens	https://doi.org/10.1099/mgen.0.000351	gsC_R._leguminosarum_SM55_GCF_004306675.1
176	SM127	GCF_004304685.1	R._leguminosarum	C		s__Rhizobium leguminosarum_C	trifolii	Denmark: Jutland	Trifolium repens	https://doi.org/10.1099/mgen.0.000351	gsC_R._leguminosarum_SM127_GCF_004304685.1
177	SM169	GCF_004303225.1	R._leguminosarum	C		s__Rhizobium leguminosarum_C	trifolii	Denmark: Jutland	Trifolium repens	https://doi.org/10.1099/mgen.0.000351	gsC_R._leguminosarum_SM169_GCF_004303225.1
178	SM77	GCF_004306275.1	R._leguminosarum	C		s__Rhizobium leguminosarum_C	trifolii	Denmark: Zealand	Trifolium repens	https://doi.org/10.1099/mgen.0.000351	gsC_R._leguminosarum_SM77_GCF_004306275.1
179	SM76	GCF_004306095.1	R._leguminosarum	C		s__Rhizobium leguminosarum_C	trifolii	Denmark: Zealand	Trifolium repens	https://doi.org/10.1099/mgen.0.000351	gsC_R._leguminosarum_SM76_GCF_004306095.1
180	SM46	GCF_004306475.1	R._leguminosarum	C		s__Rhizobium leguminosarum_C	trifolii	Denmark: Zealand	Trifolium repens	https://doi.org/10.1099/mgen.0.000351	gsC_R._leguminosarum_SM46_GCF_004306475.1
181	JHI985	GCF_010668445.1	R._leguminosarum	C			viciae	UK, North west field at Balruddery Farm (trap soil), Angus	Pisum sativum		R._leguminosarum_JHI985_GCF_010668445.1
182	SM41	GCF_004305845.1	R._leguminosarum	C		s__Rhizobium leguminosarum_C	trifolii	Denmark: Zealand	Trifolium repens	https://doi.org/10.1099/mgen.0.000351	gsC_R._leguminosarum_SM41_GCF_004305845.1
183	SM70	GCF_004305815.1	R._leguminosarum	C		s__Rhizobium leguminosarum_C	trifolii	Denmark: Zealand	Trifolium repens	https://doi.org/10.1099/mgen.0.000351	gsC_R._leguminosarum_SM70_GCF_004305815.1
184	SM69	GCF_004322935.1	R._leguminosarum	C		s__Rhizobium leguminosarum_C	trifolii	Denmark: Zealand	Trifolium repens	https://doi.org/10.1099/mgen.0.000351	gsC_R._leguminosarum_SM69_GCF_004322935.1
185	SM66	GCF_004306595.1	R._leguminosarum	C		s__Rhizobium leguminosarum_C	trifolii	Denmark: Zealand	Trifolium repens	https://doi.org/10.1099/mgen.0.000351	gsC_R._leguminosarum_SM66_GCF_004306595.1
186	SM63	GCF_004305675.1	R._leguminosarum	C		s__Rhizobium leguminosarum_C	trifolii	Denmark: Zealand	Trifolium repens	https://doi.org/10.1099/mgen.0.000351	gsC_R._leguminosarum_SM63_GCF_004305675.1
187	SM50	GCF_004306575.1	R._leguminosarum	C		s__Rhizobium leguminosarum_C	trifolii	Denmark: Zealand	Trifolium repens	https://doi.org/10.1099/mgen.0.000351	gsC_R._leguminosarum_SM50_GCF_004306575.1
188	SM61	GCF_004306165.1	R._leguminosarum	C		s__Rhizobium leguminosarum_C	trifolii	Denmark: Zealand	Trifolium repens	https://doi.org/10.1099/mgen.0.000351	gsC_R._leguminosarum_SM61_GCF_004306165.1
189	CC278f	GCF_000517045.1	R._leguminosarum	unique		s__Rhizobium leguminosarum_K	trifolii	USA	Trifolium nanum	https://doi.org/10.1038/srep16825	R._leguminosarum_CC278f_GCF_000517045.1
190	Norway	GCF_002953715.1	R._leguminosarum	unique		s__Rhizobium leguminosarum_K	viciae	Norway: Skammestein	Lotus corniculatus		R._leguminosarum_Norway_GCF_002953715.1
191	WSM80	GCF_004028075.1	R._leguminosarum	D		s__Rhizobium leguminosarum_K	trifolii	Australia	?	Murdoch University, Sofie De Meyer; 2018-11-20	R._leguminosarum_WSM80_GCF_004028075.1
192	L145	GCF_012276215.1	R._leguminosarum	D			viciae	France	Lens culinaris		R._leguminosarum_L145_GCF_012276215.1
193	SM78	GCF_004305755.1	R._leguminosarum	D		s__Rhizobium leguminosarum_K	trifolii	Denmark: Zealand	Trifolium repens	https://doi.org/10.1099/mgen.0.000351	gsD_R._leguminosarum_SM78_GCF_004305755.1
194	SM72	GCF_004306415.1	R._leguminosarum	D		s__Rhizobium leguminosarum_K	trifolii	Denmark: Zealand	Trifolium repens	https://doi.org/10.1099/mgen.0.000351	gsD_R._leguminosarum_SM72_GCF_004306415.1
195	SM164B	GCF_004303415.1	R._leguminosarum	D		s__Rhizobium leguminosarum_K	trifolii	Denmark: Jutland	Trifolium repens	https://doi.org/10.1099/mgen.0.000351	gsD_R._leguminosarum_SM164B_GCF_004303415.1
196	WSM448	GCF_004028185.1	R._leguminosarum	D		s__Rhizobium leguminosarum_K	trifolii	Australia	?	Murdoch University, Sofie De Meyer; 2018-11-20	R._leguminosarum_WSM448_GCF_004028185.1
197	SM51	GCF_004306515.1	R._leguminosarum	D	gs representative	s__Rhizobium leguminosarum_K	trifolii	Denmark: Zealand	Trifolium repens	https://doi.org/10.1099/mgen.0.000351	gsD_R._leguminosarum_SM51_GCF_004306515.1
198	SM79	GCF_004305055.1	R._leguminosarum	D		s__Rhizobium leguminosarum_K	trifolii	Denmark: Zealand	Trifolium repens	https://doi.org/10.1099/mgen.0.000351	gsD_R._leguminosarum_SM79_GCF_004305055.1
199	ATCC_14479	GCF_003290405.1	R._leguminosarum	E		s__Rhizobium leguminosarum	trifolii	USA, Arlington Farm, VA	Trifolium pratense		R._leguminosarum_ATCC_14479_GCF_003290405.1
200	DSM_30141	GCF_014138565.1	R._leguminosarum	E			trifolii	unknown	Trifolium pratense	doi: 10.1007/s00203-007-0313-y	R._leguminosarum_DSM_30141_GCF_014138565.1
201	RCAM0610	GCA_014189555.1	R._leguminosarum	E			0	Armenia	Vicia sativa		R._leguminosarum_RCAM0610_GCA_014189555.1
202	GB51	GCF_012276395.1	R._leguminosarum	E			viciae	Poland	Pisum sativum		R._leguminosarum_GB51_GCF_012276395.1
203	P2.59	GCF_012275835.1	R._leguminosarum	E			viciae	Poland	Pisum sativum		R._leguminosarum_P2.59_GCF_012275835.1
204	GD25	GCF_012276375.1	R._leguminosarum	E			viciae	Poland	Pisum sativum		R._leguminosarum_GD25_GCF_012276375.1
205	SM135B	GCF_004304595.1	R._leguminosarum	E		s__Rhizobium leguminosarum	trifolii	Denmark: Jutland	Trifolium repens	https://doi.org/10.1099/mgen.0.000351	gsE_R._leguminosarum_SM135B_GCF_004304595.1
206	SM135A	GCF_004304495.1	R._leguminosarum	E		s__Rhizobium leguminosarum	trifolii	Denmark: Jutland	Trifolium repens	https://doi.org/10.1099/mgen.0.000351	gsE_R._leguminosarum_SM135A_GCF_004304495.1
207	SM149A	GCF_004304155.1	R._leguminosarum	E		s__Rhizobium leguminosarum	trifolii	Denmark: Jutland	Trifolium repens	https://doi.org/10.1099/mgen.0.000351	gsE_R._leguminosarum_SM149A_GCF_004304155.1
208	SM160	GCF_004303515.1	R._leguminosarum	E		s__Rhizobium leguminosarum	trifolii	Denmark: Jutland	Trifolium repens	https://doi.org/10.1099/mgen.0.000351	gsE_R._leguminosarum_SM160_GCF_004303515.1
209	SM141B	GCF_004303925.1	R._leguminosarum	E		s__Rhizobium leguminosarum	trifolii	Denmark: Jutland	Trifolium repens	https://doi.org/10.1099/mgen.0.000351	gsE_R._leguminosarum_SM141B_GCF_004303925.1
210	SM168A	GCF_004303215.1	R._leguminosarum	E		s__Rhizobium leguminosarum	trifolii	Denmark: Jutland	Trifolium repens	https://doi.org/10.1099/mgen.0.000351	gsE_R._leguminosarum_SM168A_GCF_004303215.1
211	SM168B	GCF_004303125.1	R._leguminosarum	E		s__Rhizobium leguminosarum	0	Denmark: Jutland	Trifolium repens	https://doi.org/10.1099/mgen.0.000351	gsE_R._leguminosarum_SM168B_GCF_004303125.1
212	SM159	GCF_004303345.1	R._leguminosarum	E		s__Rhizobium leguminosarum	trifolii	Denmark: Jutland	Trifolium repens	https://doi.org/10.1099/mgen.0.000351	gsE_R._leguminosarum_SM159_GCF_004303345.1
213	SM126A	GCF_004304815.1	R._leguminosarum	E		s__Rhizobium leguminosarum	trifolii	Denmark: Jutland	Trifolium repens	https://doi.org/10.1099/mgen.0.000351	gsE_R._leguminosarum_SM126A_GCF_004304815.1
214	3B	GCF_011604545.1	R._leguminosarum	E			trifolii	Russia: Leningrad region	Trifolium repens		R._leguminosarum_3B_GCF_011604545.1
215	4B	GCF_011604565.1	R._leguminosarum	E			trifolii	Russia: Leningrad region	Trifolium repens		R._leguminosarum_4B_GCF_011604565.1
216	OV152	GCF_000799985.1	R._leguminosarum	E		s__Rhizobium leguminosarum	0	USA, Tennessee	Populus root microbiome		R._leguminosarum_OV152_GCF_000799985.1
217	FRP3G5	GCF_004330525.1	R._leguminosarum	E		s__Rhizobium leguminosarum	viciae	France	Pisum sativum	https://doi.org/10.1111/nph.16392	R._leguminosarum_FRP3G5_GCF_004330525.1
218	23B	GCF_011604505.1	R._leguminosarum	E			trifolii	Russia: Leningrad region	Trifolium pratense		R._leguminosarum_23B_GCF_011604505.1
219	P1.14	GCF_012275975.1	R._leguminosarum	E			viciae	Poland	Pisum sativum		R._leguminosarum_P1.14_GCF_012275975.1
220	FRP3A12	GCF_004330515.1	R._leguminosarum	E		s__Rhizobium leguminosarum	viciae	France	Pisum sativum	https://doi.org/10.1111/nph.16392	R._leguminosarum_FRP3A12_GCF_004330515.1
221	LCS0306	GCF_009755765.1	R._leguminosarum	E			phaseoli	Spain: La Baneza, Leon	Phaseolus vulgaris		R._leguminosarum_LCS0306_GCF_009755765.1
222	SEMIA_460	GCF_014138515.1	R._leguminosarum	E			0	CZE(?)	Phaseolus vulgaris		R._leguminosarum_SEMIA_460_GCF_014138515.1
223	IAUb11	GCF_012275645.1	R._leguminosarum	E			viciae	France	Pisum sativum		R._leguminosarum_IAUb11_GCF_012275645.1
224	Rt24.2	GCF_001679565.1	R._leguminosarum	E		s__Rhizobium leguminosarum	trifolii	Poland	Trifolium pratense		R._leguminosarum_Rt24.2_GCF_001679565.1
225	CB1	GCF_004028065.1	R._leguminosarum	E		s__Rhizobium leguminosarum	trifolii	Australia		Murdoch University, Sofie De Meyer; 2018-11-20	R._leguminosarum_CB1_GCF_004028065.1
226	FRP2D7	GCF_004330615.1	R._leguminosarum	E		s__Rhizobium leguminosarum	viciae	France	Pisum sativum	https://doi.org/10.1111/nph.16392	R._leguminosarum_FRP2D7_GCF_004330615.1
227	SM52	GCF_004306555.1	R._leguminosarum	E		s__Rhizobium leguminosarum	trifolii	Denmark: Zealand	Trifolium repens	https://doi.org/10.1099/mgen.0.000351	gsE_R._leguminosarum_SM52_GCF_004306555.1
228	UPM1137	GCF_000427705.1	R._leguminosarum	E		s__Rhizobium leguminosarum	viciae	Italy	Pisum sativum	https://doi.org/10.1038/srep16825	R._leguminosarum_UPM1137_GCF_000427705.1
229	SM45	GCF_004305865.1	R._leguminosarum	E		s__Rhizobium leguminosarum	trifolii	Denmark: Zealand	Trifolium repens	https://doi.org/10.1099/mgen.0.000351	gsE_R._leguminosarum_SM45_GCF_004305865.1
230	FRP5A4	GCF_004330235.1	R._leguminosarum	E		s__Rhizobium leguminosarum	viciae	France	Pisum sativum	https://doi.org/10.1111/nph.16392	R._leguminosarum_FRP5A4_GCF_004330235.1
231	FRF1A1	GCF_004330635.1	R._leguminosarum	E		s__Rhizobium leguminosarum	viciae	France	Vicia faba	https://doi.org/10.1111/nph.16392	R._leguminosarum_FRF1A1_GCF_004330635.1
232	FRF3E2	GCF_004330645.1	R._leguminosarum	E		s__Rhizobium leguminosarum	viciae	France	Vicia faba	https://doi.org/10.1111/nph.16392	R._leguminosarum_FRF3E2_GCF_004330645.1
233	CZP3H7	GCF_004330715.1	R._leguminosarum	E		s__Rhizobium leguminosarum	viciae	Czach Republic	Pisum sativum	https://doi.org/10.1111/nph.16392	R._leguminosarum_CZP3H7_GCF_004330715.1
234	SEMIA_499	GCF_014198835.1	R._leguminosarum	E			0	BEL (?)	Phaseolus vulgaris		R._leguminosarum_SEMIA_499_GCF_014198835.1
235	SEP4B10	GCF_004329875.1	R._leguminosarum	E		s__Rhizobium leguminosarum	viciae	Sweden	Pisum sativum	https://doi.org/10.1111/nph.16392	R._leguminosarum_SEP4B10_GCF_004329875.1
236	USDA_2370	GCF_002008365.1	R._leguminosarum	E	gs type strain	s__Rhizobium leguminosarum	viciae	Tunisia	Vicia faba		R._leguminosarum_USDA_2370_GCF_002008365.1
237	SEMIA_498	GCF_014198195.1	R._leguminosarum	E			0	BEL (?)	Phaseolus vulgaris		R._leguminosarum_SEMIA_498_GCF_014198195.1
238	P221	GCF_012275915.1	R._leguminosarum	E			viciae	France	Pisum sativum		R._leguminosarum_P221_GCF_012275915.1
239	SEMIA_416	GCF_014197975.1	R._leguminosarum	E			viciae	?	Phaseolus vulgaris		R._leguminosarum_SEMIA_416_GCF_014197975.1
240	SEMIA_488	GCF_014206965.1	R._leguminosarum	E			viciae	Brazil	Phaseolus vulgaris		R._leguminosarum_SEMIA_488_GCF_014206965.1
241	CZP1G4	GCF_004330845.1	R._leguminosarum	E		s__Rhizobium leguminosarum	viciae	Czach Republic	Pisum sativum	https://doi.org/10.1111/nph.16392	R._leguminosarum_CZP1G4_GCF_004330845.1
242	FRP3E11	GCF_004330545.1	R._leguminosarum	E		s__Rhizobium leguminosarum	viciae	France	Pisum sativum	https://doi.org/10.1111/nph.16392	R._leguminosarum_FRP3E11_GCF_004330545.1
243	SEP2G2	GCF_004329895.1	R._leguminosarum	E		s__Rhizobium leguminosarum	viciae	Sweden	Vicia faba	https://doi.org/10.1111/nph.16392	R._leguminosarum_SEP2G2_GCF_004329895.1
244	FRP5C5	GCF_004330225.1	R._leguminosarum	E		s__Rhizobium leguminosarum	viciae	France	Pisum sativum	https://doi.org/10.1111/nph.16392	R._leguminosarum_FRP5C5_GCF_004330225.1
245	JHI944	GCF_010668605.1	R._leguminosarum	E			viciae	UK, CSC Integrated, Balruddery Farm, Angus	Vicia faba		R._leguminosarum_JHI944_GCF_010668605.1
246	SEMIA_481	GCF_014198655.1	R._leguminosarum	E			0	?	Phaseolus vulgaris		R._leguminosarum_SEMIA_481_GCF_014198655.1
247	RSP1E11	GCF_004330095.1	R._leguminosarum	E		s__Rhizobium leguminosarum	viciae	Serbia	Pisum sativum	https://doi.org/10.1111/nph.16392	R._leguminosarum_RSP1E11_GCF_004330095.1
248	SEP3F1	GCF_004329915.1	R._leguminosarum	E		s__Rhizobium leguminosarum	viciae	Sweden	Pisum sativum	https://doi.org/10.1111/nph.16392	R._leguminosarum_SEP3F1_GCF_004329915.1
249	SEP5D7	GCF_004329905.1	R._leguminosarum	E		s__Rhizobium leguminosarum	viciae	Sweden	Pisum sativum	https://doi.org/10.1111/nph.16392	R._leguminosarum_SEP5D7_GCF_004329905.1
250	FRP5D3	GCF_004330205.1	R._leguminosarum	E		s__Rhizobium leguminosarum	viciae	France	Pisum sativum	https://doi.org/10.1111/nph.16392	R._leguminosarum_FRP5D3_GCF_004330205.1
251	L113	GCF_012275605.1	R._leguminosarum	E			viciae	France	Lens culinaris		R._leguminosarum_L113_GCF_012275605.1
252	FRP4H3	GCF_004330265.1	R._leguminosarum	E		s__Rhizobium leguminosarum	viciae	France	Pisum sativum	https://doi.org/10.1111/nph.16392	R._leguminosarum_FRP4H3_GCF_004330265.1
253	SEMIA_483	GCF_014198695.1	R._leguminosarum	E			0	Brazil	Phaseolus vulgaris		R._leguminosarum_SEMIA_483_GCF_014198695.1
254	SEMIA_445	GCF_014198115.1	R._leguminosarum	E			0	USA	Phaseolus vulgaris		R._leguminosarum_SEMIA_445_GCF_014198115.1
255	SEMIA_449	GCF_014198095.1	R._leguminosarum	E			0	?	Phaseolus vulgaris		R._leguminosarum_SEMIA_449_GCF_014198095.1
256	SEMIA_485	GCF_014198735.1	R._leguminosarum	E			0	Brazil	Phaseolus vulgaris		R._leguminosarum_SEMIA_485_GCF_014198735.1
257	CZP1G1	GCF_004330915.1	R._leguminosarum	E		s__Rhizobium leguminosarum	viciae	Czach Republic	Pisum sativum	https://doi.org/10.1111/nph.16392	R._leguminosarum_CZP1G1_GCF_004330915.1
258	SEP5D11	GCF_004329885.1	R._leguminosarum	E		s__Rhizobium leguminosarum	viciae	Sweden	Pisum sativum	https://doi.org/10.1111/nph.16392	R._leguminosarum_SEP5D11_GCF_004329885.1
259	FRP3E5	GCF_004330535.1	R._leguminosarum	E		s__Rhizobium leguminosarum	viciae	France	Pisum sativum	https://doi.org/10.1111/nph.16392	R._leguminosarum_FRP3E5_GCF_004330535.1
260	UPM988	GCF_012275595.1	R._leguminosarum	E			viciae	France	Pisum sativum		R._leguminosarum_UPM988_GCF_012275595.1
261	128C53	GCF_000373425.1	R._leguminosarum	E		s__Rhizobium leguminosarum	viciae	UK	Pisum sativum	https://doi.org/10.1038/srep16825	R._leguminosarum_128C53_GCF_000373425.1
262	UPM791	GCF_002948295.1	R._leguminosarum	E		s__Rhizobium leguminosarum	viciae	USA	Pisum sativum	https://www.mdpi.com/2073-4425/9/2/60	R._leguminosarum_UPM791_GCF_002948295.1
263	JHI1084	GCF_010668425.1	R._leguminosarum	E			viciae	USA: Yelm, WA	Lathyrus sativus		R._leguminosarum_JHI1084_GCF_010668425.1
264	CC283b	GCF_000515375.1	R._leguminosarum	E		s__Rhizobium leguminosarum	trifolii	Caucasus	Trifolium ambiguum	https://doi.org/10.1038/srep16825	R._leguminosarum_CC283b_GCF_000515375.1
265	4292	GCF_000379005.1	R._leguminosarum	E		s__Rhizobium leguminosarum	phaseoli	UK: Norfolk	Phaseolus vulgaris	https://doi.org/10.1038/srep16825	R._leguminosarum_4292_GCF_000379005.1
266	SEMIA_459	GCF_014198415.1	R._leguminosarum	E			0	RUM (?)	Phaseolus vulgaris	http://www.splink.org.br/index?lang=en	R._leguminosarum_SEMIA_459_GCF_014198415.1
267	SEMIA_463	GCF_014198545.1	R._leguminosarum	E			0	RUM (?)	Phaseolus vulgaris		R._leguminosarum_SEMIA_463_GCF_014198545.1
268	L125	GCF_012276315.1	R._leguminosarum	E			viciae	France	Lens culinaris		R._leguminosarum_L125_GCF_012276315.1
269	CZP1G9	GCF_004330865.1	R._leguminosarum	E		s__Rhizobium leguminosarum	viciae	Czach Republic	Pisum sativum	https://doi.org/10.1111/nph.16392	R._leguminosarum_CZP1G9_GCF_004330865.1
270	CZP1H7	GCF_004330855.1	R._leguminosarum	E		s__Rhizobium leguminosarum	viciae	Czach Republic	Pisum sativum	https://doi.org/10.1111/nph.16392	R._leguminosarum_CZP1H7_GCF_004330855.1
271	BIHB_1217	GCF_002243365.1	R._leguminosarum	E		s__Rhizobium leguminosarum	viciae	India:Khoksar, Lahual & Spiti Valley	Pisum sativum		R._leguminosarum_BIHB_1217_GCF_002243365.1
272	FRP4D11	GCF_004330555.1	R._leguminosarum	E		s__Rhizobium leguminosarum	viciae	France	Pisum sativum	https://doi.org/10.1111/nph.16392	R._leguminosarum_FRP4D11_GCF_004330555.1
273	FRP5H7	GCF_004330185.1	R._leguminosarum	E		s__Rhizobium leguminosarum	viciae	France	Pisum sativum	https://doi.org/10.1111/nph.16392	R._leguminosarum_FRP5H7_GCF_004330185.1
274	L324	GCF_012276125.1	R._leguminosarum	E			viciae	France	Lens culinaris		R._leguminosarum_L324_GCF_012276125.1
275	CZP3C9	GCF_004330755.1	R._leguminosarum	E		s__Rhizobium leguminosarum	viciae	Czach Republic	Pisum sativum	https://doi.org/10.1111/nph.16392	R._leguminosarum_CZP3C9_GCF_004330755.1
276	CZP3G7	GCF_004330735.1	R._leguminosarum	E		s__Rhizobium leguminosarum	viciae	Czach Republic	Pisum sativum	https://doi.org/10.1111/nph.16392	R._leguminosarum_CZP3G7_GCF_004330735.1
277	CZF1F8	GCF_004330935.1	R._leguminosarum	E		s__Rhizobium leguminosarum	viciae	Czach Republic	Vicia faba	https://doi.org/10.1111/nph.16392	R._leguminosarum_CZF1F8_GCF_004330935.1
278	SRDI943	GCF_000372105.1	R._leguminosarum	H		s__Rhizobium leguminosarum_J	trifolii	Australia	Trifolium subterraneum	https://doi.org/10.1038/srep16825	R._leguminosarum_SRDI943_GCF_000372105.1
279	CB2179	GCF_004028055.1	R._leguminosarum	H		s__Rhizobium leguminosarum_J	trifolii	Australia		Murdoch University, Sofie De Meyer; 2018-11-20	R._leguminosarum_CB2179_GCF_004028055.1
280	WSM409	GCF_004054165.1	R._leguminosarum	H		s__Rhizobium leguminosarum_J	trifolii	Australia	?	Murdoch University, Sofie De Meyer; 2018-11-20	R._leguminosarum_WSM409_GCF_004054165.1
281	WSM1325	GCF_000023185.1	R._leguminosarum	H	gs representative	s__Rhizobium leguminosarum_J	trifolii	Greece	Trifolium sp.	https://doi.org/10.1038/srep16825	R._leguminosarum_WSM1325_GCF_000023185.1
282	WSM1328	GCF_004054135.1	R._leguminosarum	H		s__Rhizobium leguminosarum_J	trifolii	Australia	?		R._leguminosarum_WSM1328_GCF_004054135.1
283	RCAM1365	GCA_014189635.1	R._leguminosarum	A			trifolii	Belarus	Trifolium repens		R._leguminosarum_RCAM1365_GCA_014189635.1
284	WSM78	GCF_004054145.1	R._leguminosarum	A		s__Rhizobium leguminosarum_E	trifolii	Australia	?	Murdoch University, Sofie De Meyer; 2018-11-20	R._leguminosarum_WSM78_GCF_004054145.1
285	SM151A	GCF_004304175.1	R._leguminosarum	A		s__Rhizobium leguminosarum_E	trifolii	Denmark: Jutland	Trifolium repens	https://doi.org/10.1099/mgen.0.000351	gsA_R._leguminosarum_SM151A_GCF_004304175.1
286	SM151B	GCF_004304085.1	R._leguminosarum	A		s__Rhizobium leguminosarum_E	trifolii	Denmark: Jutland	Trifolium repens	https://doi.org/10.1099/mgen.0.000351	gsA_R._leguminosarum_SM151B_GCF_004304085.1
287	SM123	GCF_004304845.1	R._leguminosarum	A		s__Rhizobium leguminosarum_E	trifolii	Denmark: Jutland	Trifolium repens	https://doi.org/10.1099/mgen.0.000351	gsA_R._leguminosarum_SM123_GCF_004304845.1
288	SM154A	GCF_004303735.1	R._leguminosarum	A		s__Rhizobium leguminosarum_E	trifolii	Denmark: Jutland	Trifolium repens	https://doi.org/10.1099/mgen.0.000351	gsA_R._leguminosarum_SM154A_GCF_004303735.1
289	SM154B	GCF_004303745.1	R._leguminosarum	A		s__Rhizobium leguminosarum_E	trifolii	Denmark: Jutland	Trifolium repens	https://doi.org/10.1099/mgen.0.000351	gsA_R._leguminosarum_SM154B_GCF_004303745.1
290	SM146A	GCF_004303875.1	R._leguminosarum	A		s__Rhizobium leguminosarum_E	trifolii	Denmark: Jutland	Trifolium repens	https://doi.org/10.1099/mgen.0.000351	gsA_R._leguminosarum_SM146A_GCF_004303875.1
291	9B	GCF_011604485.1	R._leguminosarum	A			trifolii	Russia: Leningrad region	Trifolium pratense		R._leguminosarum_9B_GCF_011604485.1
292	T88	GCF_013426935.1	R._leguminosarum	A			trifolii	Colombia	Trifolium pratense		R._leguminosarum_T88_GCF_013426935.1
293	SM131	GCF_004304285.1	R._leguminosarum	A		s__Rhizobium leguminosarum_E	trifolii	Denmark: Jutland	Trifolium repens	https://doi.org/10.1099/mgen.0.000351	gsA_R._leguminosarum_SM131_GCF_004304285.1
294	SM128A	GCF_004304705.1	R._leguminosarum	A		s__Rhizobium leguminosarum_E	trifolii	Denmark: Jutland	Trifolium repens	https://doi.org/10.1099/mgen.0.000351	gsA_R._leguminosarum_SM128A_GCF_004304705.1
295	SM128B	GCF_004304555.1	R._leguminosarum	A		s__Rhizobium leguminosarum_E	trifolii	Denmark: Jutland	Trifolium repens	https://doi.org/10.1099/mgen.0.000351	gsA_R._leguminosarum_SM128B_GCF_004304555.1
296	SM138A	GCF_004304455.1	R._leguminosarum	A		s__Rhizobium leguminosarum_E	trifolii	Denmark: Jutland	Trifolium repens	https://doi.org/10.1099/mgen.0.000351	gsA_R._leguminosarum_SM138A_GCF_004304455.1
297	CC275e	GCF_000769405.2	R._leguminosarum	A	gs representative		trifolii	Australia	Trifolium repens	https://doi.org/10.1094/MPMI-08-20-0220-A	R._leguminosarum_CC275e_GCF_000769405.2
298	SM140B	GCF_004304635.1	R._leguminosarum	A		s__Rhizobium leguminosarum_E	trifolii	Denmark: Jutland	Trifolium repens	https://doi.org/10.1099/mgen.0.000351	gsA_R._leguminosarum_SM140B_GCF_004304635.1
299	SM145C	GCF_004304065.1	R._leguminosarum	A		s__Rhizobium leguminosarum_E	trifolii	Denmark: Jutland	Trifolium repens	https://doi.org/10.1099/mgen.0.000351	gsA_R._leguminosarum_SM145C_GCF_004304065.1
300	SM130B	GCF_004304475.1	R._leguminosarum	A		s__Rhizobium leguminosarum_E	trifolii	Denmark: Jutland	Trifolium repens	https://doi.org/10.1099/mgen.0.000351	gsA_R._leguminosarum_SM130B_GCF_004304475.1
301	SM155B	GCF_004303535.1	R._leguminosarum	A		s__Rhizobium leguminosarum_E	trifolii	Denmark: Jutland	Trifolium repens	https://doi.org/10.1099/mgen.0.000351	gsA_R._leguminosarum_SM155B_GCF_004303535.1
302	SM155A	GCF_004303465.1	R._leguminosarum	A		s__Rhizobium leguminosarum_E	trifolii	Denmark: Jutland	Trifolium repens	https://doi.org/10.1099/mgen.0.000351	gsA_R._leguminosarum_SM155A_GCF_004303465.1
303	SM155C	GCF_004303655.1	R._leguminosarum	A		s__Rhizobium leguminosarum_E	trifolii	Denmark: Jutland	Trifolium repens	https://doi.org/10.1099/mgen.0.000351	gsA_R._leguminosarum_SM155C_GCF_004303655.1
304	SM140A	GCF_004304355.1	R._leguminosarum	A		s__Rhizobium leguminosarum_E	trifolii	Denmark: Jutland	Trifolium repens	https://doi.org/10.1099/mgen.0.000351	gsA_R._leguminosarum_SM140A_GCF_004304355.1
305	SM146B	GCF_004303835.1	R._leguminosarum	A		s__Rhizobium leguminosarum_E	trifolii	Denmark: Jutland	Trifolium repens	https://doi.org/10.1099/mgen.0.000351	gsA_R._leguminosarum_SM146B_GCF_004303835.1
306	SM130A	GCF_004304365.1	R._leguminosarum	A		s__Rhizobium leguminosarum_E	trifolii	Denmark: Jutland	Trifolium repens	https://doi.org/10.1099/mgen.0.000351	gsA_R._leguminosarum_SM130A_GCF_004304365.1
307	SM163A	GCF_004303275.1	R._leguminosarum	A		s__Rhizobium leguminosarum_E	trifolii	Denmark: Jutland	Trifolium repens	https://doi.org/10.1099/mgen.0.000351	gsA_R._leguminosarum_SM163A_GCF_004303275.1
308	SM136A	GCF_004304335.1	R._leguminosarum	A		s__Rhizobium leguminosarum_E	trifolii	Denmark: Jutland	Trifolium repens	https://doi.org/10.1099/mgen.0.000351	gsA_R._leguminosarum_SM136A_GCF_004304335.1
309	SM154C	GCF_004303365.1	R._leguminosarum	A		s__Rhizobium leguminosarum_E	trifolii	Denmark: Jutland	Trifolium repens	https://doi.org/10.1099/mgen.0.000351	gsA_R._leguminosarum_SM154C_GCF_004303365.1
310	SM163B	GCF_004303255.1	R._leguminosarum	A		s__Rhizobium leguminosarum_E	trifolii	Denmark: Jutland	Trifolium repens	https://doi.org/10.1099/mgen.0.000351	gsA_R._leguminosarum_SM163B_GCF_004303255.1
311	SM145A	GCF_004304245.1	R._leguminosarum	A		s__Rhizobium leguminosarum_E	trifolii	Denmark: Jutland	Trifolium repens	https://doi.org/10.1099/mgen.0.000351	gsA_R._leguminosarum_SM145A_GCF_004304245.1
312	SM144B	GCF_004303975.1	R._leguminosarum	A		s__Rhizobium leguminosarum_E	trifolii	Denmark: Jutland	Trifolium repens	https://doi.org/10.1099/mgen.0.000351	gsA_R._leguminosarum_SM144B_GCF_004303975.1
313	SM138B	GCF_004304385.1	R._leguminosarum	A		s__Rhizobium leguminosarum_E	trifolii	Denmark: Jutland	Trifolium repens	https://doi.org/10.1099/mgen.0.000351	gsA_R._leguminosarum_SM138B_GCF_004304385.1
314	SM144A	GCF_004303625.1	R._leguminosarum	A		s__Rhizobium leguminosarum_E	trifolii	Denmark: Jutland	Trifolium repens	https://doi.org/10.1099/mgen.0.000351	gsA_R._leguminosarum_SM144A_GCF_004303625.1
315	SM137B	GCF_004304535.1	R._leguminosarum	A		s__Rhizobium leguminosarum_E	trifolii	Denmark: Jutland	Trifolium repens	https://doi.org/10.1099/mgen.0.000351	gsA_R._leguminosarum_SM137B_GCF_004304535.1
316	SM145B	GCF_004303985.1	R._leguminosarum	A		s__Rhizobium leguminosarum_E	trifolii	Denmark: Jutland	Trifolium repens	https://doi.org/10.1099/mgen.0.000351	gsA_R._leguminosarum_SM145B_GCF_004303985.1
317	SM152A	GCF_004303715.1	R._leguminosarum	A		s__Rhizobium leguminosarum_E	trifolii	Denmark: Jutland	Trifolium repens	https://doi.org/10.1099/mgen.0.000351	gsA_R._leguminosarum_SM152A_GCF_004303715.1
318	SM152B	GCF_004303755.1	R._leguminosarum	A		s__Rhizobium leguminosarum_E	trifolii	Denmark: Jutland	Trifolium repens	https://doi.org/10.1099/mgen.0.000351	gsA_R._leguminosarum_SM152B_GCF_004303755.1
319	SM152C	GCF_004303945.1	R._leguminosarum	A		s__Rhizobium leguminosarum_E	trifolii	Denmark: Jutland	Trifolium repens	https://doi.org/10.1099/mgen.0.000351	gsA_R._leguminosarum_SM152C_GCF_004303945.1
320	WYCCWR10014	GCF_001657485.1	R._sp.	unique		s__Rhizobium sp001657485	trifolii	China: Shanghai	Trifolium repens		R._sp._WYCCWR10014_WYCCWR10014_GCF_001657485.1
321	Tri-43	GCF_004123835.1	R._leguminosarum	unique		s__Rhizobium leguminosarum_M	0	Russia: Baikal Lake region, Siberia	Oxytropis triphylla		R._leguminosarum_Tri-43_GCF_004123835.1
322	CCBAU11080	GCF_012276545.1	R._leguminosarum	G			viciae	China	Vicia faba		R._leguminosarum_CCBAU11080_GCF_012276545.1
323	CCBAU33195	GCF_012276535.1	R._leguminosarum	G			viciae	China	Vicia faba		R._leguminosarum_CCBAU33195_GCF_012276535.1
324	CCBAU_03386	GCF_013087515.1	R._sophorae	G	gs type strain		0	China:Qinghai	Sophora flavescens		R._sophorae_CCBAU_03386_GCF_013087515.1
325	WYCCWR11317	GCF_014050125.1	R._sp.	S			0	China:Changzhi	Vicia sativa		R._sp._WYCCWR11317_GCF_014050125.1
326	WYCCWR_11279	GCF_013087625.1	R._sp.	S			0	China:Changzhi	Vicia sativa		R._sp._WYCCWR_11279_WYCCWR_11279_GCF_013087625.1
327	WYCCWR_11290	GCF_013426945.1	R._sp.	S	gs representative		viciae	China:Changzhi	Vicia sativa		R._sp._WYCCWR_11290_WYCCWR_11290_GCF_013426945.1
328	JKLM12A2	GCF_005862305.2	R._sp.	I	gs type strain		viciae	India: Durbuk Village, Leh	Pisum sativum	https://doi.org/10.1016/j.syapm.2020.126127	R._sp._JKLM12A2_JKLM12A2_GCF_005862305.2
329	WYCCWR_11128	GCF_013416305.1	R._sp.	I			0	China: Xining	Vicia sativa		R._sp._WYCCWR_11128_WYCCWR_11128_GCF_013416305.1
330	WYCCWR_11146	GCA_013591995.1	R._sp.	I			viciae	China: Xining	Vicia sativa		R._sp._WYCCWR_11146_WYCCWR_11146_GCA_013591995.1
331	JKLM13E	GCF_005860925.2	R._sp.	I			viciae	India: Maan Village, Leh	Pisum sativum	https://doi.org/10.1016/j.syapm.2020.126127	R._sp._JKLM13E_JKLM13E_GCF_005860925.2
332	WYCCWR_11152	GCF_013087615.1	R._sp.	I			0	China: Xining	Vicia sativa		R._sp._WYCCWR_11152_WYCCWR_11152_GCF_013087615.1
333	HP3	GCF_012276365.1	R._laguerreae	Q			viciae	Algeria	Pisum sativum		R._laguerreae_HP3_GCF_012276365.1
334	SPF2A11	GCF_004329805.1	R._laguerreae	Q		s__Rhizobium laguerreae	viciae	Spain	Vicia faba	https://doi.org/10.1111/nph.16392	R._laguerreae_SPF2A11_GCF_004329805.1
335	248	GCF_010365265.1	R._leguminosarum	Q	gs representative		viciae	UK: Norfolk	Vicia faba	https://doi.org/10.1038/srep16825	R._leguminosarum_248_GCF_010365265.1
336	L241	GCF_012276195.1	R._leguminosarum	Q			viciae	France	Lens culinaris		R._leguminosarum_L241_GCF_012276195.1
337	GLR17	GCF_012276335.1	R._leguminosarum	Q			viciae	Germany	Lens culinaris		R._leguminosarum_GLR17_GCF_012276335.1
338	GLR2	GCF_012276355.1	R._leguminosarum	Q			viciae	Germany	Lens culinaris		R._leguminosarum_GLR2_GCF_012276355.1
339	L144	GCF_012276225.1	R._leguminosarum	Q			viciae	France	Lens culinaris		R._leguminosarum_L144_GCF_012276225.1
340	L353	GCF_012276115.1	R._leguminosarum	Q			viciae	France	Lens culinaris		R._leguminosarum_L353_GCF_012276115.1
341	WSM1689	GCF_000517605.1	R._leguminosarum	unique		s__Rhizobium laguerreae	trifolii	Greece: 6 km from Eggares, Naxos	Trifolium uniflorum		R._leguminosarum_WSM1689_GCF_000517605.1
342	CCBAU10279	GCF_012276585.1	R._laguerreae	unique			viciae	China	Vicia faba		R._laguerreae_CCBAU10279_GCF_012276585.1
343	CL8	GCF_012276455.1	R._laguerreae	R			viciae	Algeria	Lens culinaris		R._laguerreae_CL8_GCF_012276455.1
344	FB403	GCF_004346285.1	R._laguerreae	R		s__Rhizobium laguerreae	viciae	Tunisia	Vicia faba		R._laguerreae_FB403_GCF_004346285.1
345	SS21	GCF_012275795.1	R._laguerreae	R			viciae	Algeria	Pisum sativum		R._laguerreae_SS21_GCF_012275795.1
346	OS25	GCF_012276015.1	R._laguerreae	R			viciae	Algeria	Pisum sativum		R._laguerreae_OS25_GCF_012276015.1
347	OL29	GCF_012275995.1	R._laguerreae	R			viciae	Algeria	Lens culinaris		R._laguerreae_OL29_GCF_012275995.1
348	SL16	GCF_012275885.1	R._laguerreae	R			viciae	Algeria	Lens culinaris		R._laguerreae_SL16_GCF_012275885.1
349	SP4	GCF_012275785.1	R._laguerreae	R			viciae	Algeria	Pisum sativum	https://www.ncbi.nlm.nih.gov/bioproject/579265	R._laguerreae_SP4_GCF_012275785.1
350	FB206	GCF_002008165.1	R._laguerreae	R	gs type strain	s__Rhizobium laguerreae	viciae	Tunisia	Vicia faba		R._laguerreae_FB206_GCF_002008165.1
351	SPF2F4	GCF_004329785.1	R._laguerreae	R		s__Rhizobium laguerreae	viciae	Spain	Vicia faba	https://doi.org/10.1111/nph.16392	R._laguerreae_SPF2F4_GCF_004329785.1
352	SPF4F7	GCF_004329795.1	R._laguerreae	R		s__Rhizobium laguerreae	viciae	Spain	Vicia faba	https://doi.org/10.1111/nph.16392	R._laguerreae_SPF4F7_GCF_004329795.1
353	HUTR05	GCF_013004195.1	R._laguerreae	R			trifolii	Spain:Salamanca	Trifolium repens	http://dx.doi.org/10.3390/foods9091166	R._laguerreae_HUTR05_GCF_013004195.1
354	SP15	GCF_012275855.1	R._laguerreae	R			viciae	Algeria	Pisum sativum	https://www.ncbi.nlm.nih.gov/bioproject/579265	R._laguerreae_SP15_GCF_012275855.1
355	Vaf-108	GCF_001890425.1	R._leguminosarum	P		s__Rhizobium laguerreae	viciae	Russia: Dagestan	Vavilovia formosa		R._leguminosarum_Vaf-108_GCF_001890425.1
356	Vaf10	GCF_001679785.1	R._leguminosarum	P	gs representative		viciae	Russia: North Osetia, Caucasus	Vavilovia formosa		R._leguminosarum_Vaf10_GCF_001679785.1
357	L411	GCF_012275615.1	R._leguminosarum	O			viciae	France	Lens culinaris		R._leguminosarum_L411_GCF_012275615.1
358	UPM1131	GCF_000427945.1	R._leguminosarum	O		s__Rhizobium laguerreae	viciae	Italy	Pisum sativum	https://doi.org/10.1038/srep16825	R._leguminosarum_UPM1131_GCF_000427945.1
359	JHI2449	GCF_010668165.1	R._laguerreae	O	gs representative		viciae	UK, Norfolk (trap soil)	Pisum sativum		R._laguerreae_JHI2449_GCF_010668165.1
360	L563	GCF_012276025.1	R._leguminosarum	O			viciae	France	Lens culinaris		R._leguminosarum_L563_GCF_012276025.1
361	L244	GCF_012276155.1	R._leguminosarum	O			viciae	France	Lens culinaris		R._leguminosarum_L244_GCF_012276155.1
362	L231	GCF_012276175.1	R._leguminosarum	O			viciae	France	Lens culinaris		R._leguminosarum_L231_GCF_012276175.1
363	L361	GCF_012276075.1	R._leguminosarum	O			viciae	France	Lens culinaris		R._leguminosarum_L361_GCF_012276075.1
364	L364	GCF_012276085.1	R._leguminosarum	O			viciae	France	Lens culinaris		R._leguminosarum_L364_GCF_012276085.1
365	RSP1A1	GCF_004330105.1	R._leguminosarum	N		s__Rhizobium laguerreae	viciae	Serbia	Pisum sativum	https://doi.org/10.1111/nph.16392	R._leguminosarum_RSP1A1_GCF_004330105.1
366	FRF1D12	GCF_004330655.1	R._leguminosarum	N		s__Rhizobium laguerreae	viciae	France	Vicia faba	https://doi.org/10.1111/nph.16392	R._leguminosarum_FRF1D12_GCF_004330655.1
367	L141	GCF_012276275.1	R._leguminosarum	N			viciae	France	Lens culinaris		R._leguminosarum_L141_GCF_012276275.1
368	RSF1B9	GCF_004330175.1	R._leguminosarum	N		s__Rhizobium laguerreae	viciae	Serbia	Vicia faba	https://doi.org/10.1111/nph.16392	R._leguminosarum_RSF1B9_GCF_004330175.1
369	RSP1F2	GCF_004330005.1	R._leguminosarum	N		s__Rhizobium laguerreae	viciae	Serbia	Pisum sativum	https://doi.org/10.1111/nph.16392	R._leguminosarum_RSP1F2_GCF_004330005.1
370	L143	GCF_012276245.1	R._leguminosarum	N			viciae	France	Lens culinaris		R._leguminosarum_L143_GCF_012276245.1
371	PEPV16	GCF_008919455.1	R._sp.	N			viciae	Spain, Salamanca	Phaseolus vulgaris		R._sp._PEPV16_PEPV16_GCF_008919455.1
372	TOM	GCF_000372205.1	R._leguminosarum	N	gs representative	s__Rhizobium laguerreae	viciae	Turkey	Pisum sativum	https://doi.org/10.1038/srep16825	R._leguminosarum_TOM_GCF_000372205.1
373	CCBAU83268	GCF_012276475.1	R._leguminosarum	N			viciae	China	Vicia faba		R._leguminosarum_CCBAU83268_GCF_012276475.1
374	BIHB_1148	GCF_002240185.1	R._leguminosarum	N		s__Rhizobium laguerreae	0	India:Kaza,Lahaul Spiti, State, Himachal Pradesh	Pisum sativum		R._leguminosarum_BIHB_1148_GCF_002240185.1
375	RSP1F10	GCF_004330075.1	R._leguminosarum	N		s__Rhizobium laguerreae	viciae	Serbia	Pisum sativum	https://doi.org/10.1111/nph.16392	R._leguminosarum_RSP1F10_GCF_004330075.1
376	FWPou15	GCF_013391685.1	R._leguminosarum	N			viciae	France	Triticum turgidum		R._leguminosarum_FWPou15_GCF_013391685.1
377	FWPou32	GCF_013391665.1	R._leguminosarum	N			viciae	France	Triticum turgidum		R._leguminosarum_FWPou32_GCF_013391665.1
378	FWPou38	GCF_013391705.1	R._leguminosarum	N			viciae	France	Triticum turgidum		R._leguminosarum_FWPou38_GCF_013391705.1
379	Vaf12	GCF_001612535.1	R._leguminosarum	unique		s__Rhizobium sp005860925	viciae	Russia: North Osetia, Caucasus	Vavilovia formosa		R._leguminosarum_Vaf12_GCF_001612535.1
380	JHI10	GCF_010668925.1	R._leguminosarum	K			viciae	UK, Carnoustie, Angus	Pisum sativum		R._leguminosarum_JHI10_GCF_010668925.1
381	JHI2450	GCF_010668125.1	R._leguminosarum	K			viciae	UK, Norfolk (trap soil)	Pisum sativum		R._leguminosarum_JHI2450_GCF_010668125.1
382	JHI54	GCF_010668875.1	R._leguminosarum	K			viciae	UK, Carnoustie, Angus	Vicia sativa		R._leguminosarum_JHI54_GCF_010668875.1
383	FA23	GCF_000419705.1	R._leguminosarum	K	gs representative	s__Rhizobium leguminosarum_L	phaseoli	Poland	Phaseolus vulgaris	https://doi.org/10.1038/srep16825	R._leguminosarum_FA23_GCF_000419705.1
384	JHI2451	GCF_010668065.1	R._leguminosarum	K			viciae	UK, Norfolk (trap soil)	Pisum sativum		R._leguminosarum_JHI2451_GCF_010668065.1
385	WSM1455	GCF_000271805.1	R._leguminosarum	J	gs representative	s__Rhizobium leguminosarum_L	viciae	Greece	Vicia faba	https://doi.org/10.1186/1944-3277-10-14	R._leguminosarum_WSM1455_GCF_000271805.1
386	WSM1481	GCF_000372305.1	R._leguminosarum	J		s__Rhizobium leguminosarum_L	viciae	Greece: Mykonos	Vicia faba	https://doi.org/10.1186/1944-3277-10-14	R._leguminosarum_WSM1481_GCF_000372305.1
387	SM12	GCF_004306015.1	R._leguminosarum	B		s__Rhizobium leguminosarum_L	trifolii	UK: Gloucestershire	Trifolium repens	https://doi.org/10.1099/mgen.0.000351	gsB_R._leguminosarum_SM12_GCF_004306015.1
388	P1NP2K	GCF_012275875.1	R._leguminosarum	B			viciae	France	Pisum sativum		R._leguminosarum_P1NP2K_GCF_012275875.1
389	RSP1E6	GCF_004330085.1	R._leguminosarum	B		s__Rhizobium leguminosarum_L	viciae	Serbia	Pisum sativum	https://doi.org/10.1111/nph.16392	R._leguminosarum_RSP1E6_GCF_004330085.1
390	VF39	GCF_000427765.1	R._leguminosarum	B		s__Rhizobium leguminosarum_L	viciae	UK	Vicia faba		R._leguminosarum_VF39_GCF_000427765.1
391	SM32	GCF_004322915.1	R._leguminosarum	B		s__Rhizobium leguminosarum_L	trifolii	UK: Gloucestershire	Trifolium repens	https://doi.org/10.1099/mgen.0.000351	gsB_R._leguminosarum_SM32_GCF_004322915.1
392	SM17	GCF_004306885.1	R._leguminosarum	B		s__Rhizobium leguminosarum_L	trifolii	UK: Gloucestershire	Trifolium repens	https://doi.org/10.1099/mgen.0.000351	gsB_R._leguminosarum_SM17_GCF_004306885.1
393	SM7	GCF_004307195.1	R._leguminosarum	B		s__Rhizobium leguminosarum_L	trifolii	UK: Gloucestershire	Trifolium repens	https://doi.org/10.1099/mgen.0.000351	gsB_R._leguminosarum_SM7_GCF_004307195.1
394	SM11	GCF_004306915.1	R._leguminosarum	B		s__Rhizobium leguminosarum_L	trifolii	UK: Gloucestershire	Trifolium repens	https://doi.org/10.1099/mgen.0.000351	gsB_R._leguminosarum_SM11_GCF_004306915.1
395	SM9	GCF_004307185.1	R._leguminosarum	B		s__Rhizobium leguminosarum_L	trifolii	UK: Gloucestershire	Trifolium repens	https://doi.org/10.1099/mgen.0.000351	gsB_R._leguminosarum_SM9_GCF_004307185.1
396	SM13	GCF_004307165.1	R._leguminosarum	B		s__Rhizobium leguminosarum_L	trifolii	UK: Gloucestershire	Trifolium repens	https://doi.org/10.1099/mgen.0.000351	gsB_R._leguminosarum_SM13_GCF_004307165.1
397	SM34	GCF_004306605.1	R._leguminosarum	B		s__Rhizobium leguminosarum_L	trifolii	UK: Gloucestershire	Trifolium repens	https://doi.org/10.1099/mgen.0.000351	gsB_R._leguminosarum_SM34_GCF_004306605.1
398	SM3	GCF_004307125.1	R._leguminosarum	B		s__Rhizobium leguminosarum_L	trifolii	UK: Gloucestershire	Trifolium repens	https://doi.org/10.1099/mgen.0.000351	gsB_R._leguminosarum_SM3_GCF_004307125.1
399	CCBAU03058	GCF_012276615.1	R._leguminosarum	B			viciae	China	Vicia faba		R._leguminosarum_CCBAU03058_GCF_012276615.1
400	CCBAU65264	GCF_012276485.1	R._leguminosarum	B			viciae	China	Vicia faba		R._leguminosarum_CCBAU65264_GCF_012276485.1
401	SEMIA_475	GCF_014198665.1	R._leguminosarum	B			0	Argentina	Phaseolus vulgaris		R._leguminosarum_SEMIA_475_GCF_014198665.1
402	JHI973	GCF_010668505.1	R._leguminosarum	B			viciae	UK, East field at Balruddery Farm (trap soil), Angus	Pisum sativum		R._leguminosarum_JHI973_GCF_010668505.1
403	JHI974	GCF_010668475.1	R._leguminosarum	B			viciae	UK, East field at Balruddery Farm (trap soil), Angus	Pisum sativum		R._leguminosarum_JHI974_GCF_010668475.1
404	SM4	GCF_004307035.1	R._leguminosarum	B		s__Rhizobium leguminosarum_L	trifolii	UK: Gloucestershire	Trifolium repens	https://doi.org/10.1099/mgen.0.000351	gsB_R._leguminosarum_SM4_GCF_004307035.1
405	22B	GCF_011604525.1	R._leguminosarum	B			trifolii	Russia: Leningrad region	Trifolium pratense		R._leguminosarum_22B_GCF_011604525.1
406	JHI13	GCF_010668945.1	R._leguminosarum	B			viciae	UK, Monifieth, Angus	Pisum sativum		R._leguminosarum_JHI13_GCF_010668945.1
407	SM36	GCF_004306655.1	R._leguminosarum	B		s__Rhizobium leguminosarum_L	trifolii	UK: Gloucestershire	Trifolium repens	https://doi.org/10.1099/mgen.0.000351	gsB_R._leguminosarum_SM36_GCF_004306655.1
408	JHI1415	GCF_010668265.1	R._leguminosarum	B			viciae	UK, Yatesbury House Farm, Avebury, Wilts, Wiltshire	Lens culinaris		R._leguminosarum_JHI1415_GCF_010668265.1
409	JHI535	GCF_010668705.1	R._leguminosarum	B			viciae	UK, Yatesbury House Farm, Avebury, Wilts, Wiltshire	Vicia faba		R._leguminosarum_JHI535_GCF_010668705.1
410	JHI585	GCF_010668715.1	R._leguminosarum	B			viciae	UK, Yatesbury House Farm, Avebury, Wilts, Wiltshire	Vicia faba		R._leguminosarum_JHI585_GCF_010668715.1
411	JHI1600	GCF_010668195.1	R._leguminosarum	B			viciae	UK, White Horse Hill (trap soil), Wiltshire	Pisum sativum		R._leguminosarum_JHI1600_GCF_010668195.1
412	JHI1587	GCF_010668175.1	R._leguminosarum	B			viciae	UK, Hope Farm (trap soil), Cambridge	Pisum sativum		R._leguminosarum_JHI1587_GCF_010668175.1
413	P1NP1J	GCF_012275665.1	R._leguminosarum	B			viciae	France	Pisum sativum		R._leguminosarum_P1NP1J_GCF_012275665.1
414	P1NP2H	GCF_012275945.1	R._leguminosarum	B			viciae	France	Pisum sativum		R._leguminosarum_P1NP2H_GCF_012275945.1
415	RSF2G1	GCF_004330135.1	R._leguminosarum	B		s__Rhizobium leguminosarum_L	viciae	Serbia	Vicia faba	https://doi.org/10.1111/nph.16392	R._leguminosarum_RSF2G1_GCF_004330135.1
416	SPF4F3	GCF_004329775.1	R._leguminosarum	B		s__Rhizobium leguminosarum_L	viciae	Spain	Vicia faba	https://doi.org/10.1111/nph.16392	R._leguminosarum_SPF4F3_GCF_004329775.1
417	SM22	GCF_004306805.1	R._leguminosarum	B		s__Rhizobium leguminosarum_L	trifolii	UK: Gloucestershire	Trifolium repens	https://doi.org/10.1099/mgen.0.000351	gsB_R._leguminosarum_SM22_GCF_004306805.1
418	SM39	GCF_004306715.1	R._leguminosarum	B		s__Rhizobium leguminosarum_L	trifolii	UK: Gloucestershire	Trifolium repens	https://doi.org/10.1099/mgen.0.000351	gsB_R._leguminosarum_SM39_GCF_004306715.1
419	SM20	GCF_004305945.1	R._leguminosarum	B		s__Rhizobium leguminosarum_L	trifolii	UK: Gloucestershire	Trifolium repens	https://doi.org/10.1099/mgen.0.000351	gsB_R._leguminosarum_SM20_GCF_004305945.1
420	SM5	GCF_004307025.1	R._leguminosarum	B		s__Rhizobium leguminosarum_L	trifolii	Denmark: Zealand	Trifolium repens	https://doi.org/10.1099/mgen.0.000351	gsB_R._leguminosarum_SM5_GCF_004307025.1
421	SM14	GCF_004306875.1	R._leguminosarum	B		s__Rhizobium leguminosarum_L	trifolii	UK: Gloucestershire	Trifolium repens	https://doi.org/10.1099/mgen.0.000351	gsB_R._leguminosarum_SM14_GCF_004306875.1
422	SM18	GCF_004305935.1	R._leguminosarum	B		s__Rhizobium leguminosarum_L	trifolii	UK: Gloucestershire	Trifolium repens	https://doi.org/10.1099/mgen.0.000351	gsB_R._leguminosarum_SM18_GCF_004305935.1
423	SM19	GCF_004307135.1	R._leguminosarum	B		s__Rhizobium leguminosarum_L	trifolii	UK: Gloucestershire	Trifolium repens	https://doi.org/10.1099/mgen.0.000351	gsB_R._leguminosarum_SM19_GCF_004307135.1
424	SM25	GCF_004305625.1	R._leguminosarum	B		s__Rhizobium leguminosarum_L	trifolii	UK: Gloucestershire	Trifolium repens	https://doi.org/10.1099/mgen.0.000351	gsB_R._leguminosarum_SM25_GCF_004305625.1
425	SM27	GCF_004306355.1	R._leguminosarum	B		s__Rhizobium leguminosarum_L	trifolii	UK: Gloucestershire	Trifolium repens	https://doi.org/10.1099/mgen.0.000351	gsB_R._leguminosarum_SM27_GCF_004306355.1
426	SM16	GCF_004307045.1	R._leguminosarum	B		s__Rhizobium leguminosarum_L	trifolii	UK: Gloucestershire	Trifolium repens	https://doi.org/10.1099/mgen.0.000351	gsB_R._leguminosarum_SM16_GCF_004307045.1
427	SM6	GCF_004306925.1	R._leguminosarum	B		s__Rhizobium leguminosarum_L	trifolii	Denmark: Zealand	Trifolium repens	https://doi.org/10.1099/mgen.0.000351	gsB_R._leguminosarum_SM6_GCF_004306925.1
428	SM15	GCF_004306815.1	R._leguminosarum	B		s__Rhizobium leguminosarum_L	trifolii	UK: Gloucestershire	Trifolium repens	https://doi.org/10.1099/mgen.0.000351	gsB_R._leguminosarum_SM15_GCF_004306815.1
429	SM21	GCF_004306835.1	R._leguminosarum	B		s__Rhizobium leguminosarum_L	trifolii	UK: Gloucestershire	Trifolium repens	https://doi.org/10.1099/mgen.0.000351	gsB_R._leguminosarum_SM21_GCF_004306835.1
430	SM10	GCF_004322895.1	R._leguminosarum	B		s__Rhizobium leguminosarum_L	trifolii	UK: Gloucestershire	Trifolium repens	https://doi.org/10.1099/mgen.0.000351	gsB_R._leguminosarum_SM10_GCF_004322895.1
431	SM38	GCF_004306065.1	R._leguminosarum	B		s__Rhizobium leguminosarum_L	trifolii	UK: Gloucestershire	Trifolium repens	https://doi.org/10.1099/mgen.0.000351	gsB_R._leguminosarum_SM38_GCF_004306065.1
432	SM24	GCF_004306755.1	R._leguminosarum	B		s__Rhizobium leguminosarum_L	trifolii	UK: Gloucestershire	Trifolium repens	https://doi.org/10.1099/mgen.0.000351	gsB_R._leguminosarum_SM24_GCF_004306755.1
433	SM31	GCF_004306425.1	R._leguminosarum	B		s__Rhizobium leguminosarum_L	trifolii	UK: Gloucestershire	Trifolium repens	https://doi.org/10.1099/mgen.0.000351	gsB_R._leguminosarum_SM31_GCF_004306425.1
434	3841	GCF_000009265.1	R._leguminosarum	B	gs representative	s__Rhizobium leguminosarum_L	viciae	UK: Norfolk	Pisum sativum		R._leguminosarum_3841_GCF_000009265.1
435	JHI963	GCF_010668515.1	R._leguminosarum	B			viciae	UK, East Hendred, Oxon, Oxfordshire	Vicia faba	https://doi.org/10.1186/gb-2006-7-4-r34	R._leguminosarum_JHI963_GCF_010668515.1
436	SM30	GCF_004306225.1	R._leguminosarum	B		s__Rhizobium leguminosarum_L	trifolii	UK: Gloucestershire	Trifolium repens	https://doi.org/10.1099/mgen.0.000351	gsB_R._leguminosarum_SM30_GCF_004306225.1
437	SM40	GCF_004306785.1	R._leguminosarum	B		s__Rhizobium leguminosarum_L	trifolii	UK: Gloucestershire	Trifolium repens	https://doi.org/10.1099/mgen.0.000351	gsB_R._leguminosarum_SM40_GCF_004306785.1
438	SM35	GCF_004306175.1	R._leguminosarum	B		s__Rhizobium leguminosarum_L	trifolii	UK: Gloucestershire	Trifolium repens	https://doi.org/10.1099/mgen.0.000351	gsB_R._leguminosarum_SM35_GCF_004306175.1
439	JHI960	GCA_010668545.1	R._leguminosarum	B			viciae	UK, East Hendred, Oxon, Oxfordshire	Vicia faba		R._leguminosarum_JHI960_GCA_010668545.1
440	SM37	GCF_004306455.1	R._leguminosarum	B		s__Rhizobium leguminosarum_L	trifolii	UK: Gloucestershire	Trifolium repens	https://doi.org/10.1099/mgen.0.000351	gsB_R._leguminosarum_SM37_GCF_004306455.1

## Sheet: Table S2
GCA_000464375.1_ASM46437v1_genomic.fna.gz
GCA_001896825.1_ASM189682v1_genomic.fna.gz
GCA_001899545.1_ASM189954v1_genomic.fna.gz
GCA_002200935.1_ASM220093v1_genomic.fna.gz
GCA_002338015.1_ASM233801v1_genomic.fna.gz
GCA_002796995.1_ASM279699v1_genomic.fna.gz
GCA_003248675.1_ASM324867v1_genomic.fna.gz
GCA_003501385.1_ASM350138v1_genomic.fna.gz
GCA_003527225.1_ASM352722v1_genomic.fna.gz
GCA_004801395.1_ASM480139v1_genomic.fna.gz
GCA_008015245.1_ASM801524v1_genomic.fna.gz
GCA_008015315.1_ASM801531v1_genomic.fna.gz
GCA_010668545.1_ASM1066854v1_genomic.fna.gz
GCA_011128975.2_ASM1112897v2_genomic.fna.gz
GCA_011319455.1_ASM1131945v1_genomic.fna.gz
GCA_012412905.1_ASM1241290v1_genomic.fna.gz
GCA_013087605.1_ASM1308760v1_genomic.fna.gz
GCA_013591995.1_ASM1359199v1_genomic.fna.gz
GCA_900492195.1_T2.26MG-112.21_plasmid_genomic.fna.gz
GCF_000009265.1_ASM926v1_genomic.fna.gz
GCF_000020265.1_ASM2026v1_genomic.fna.gz
GCF_000021345.1_ASM2134v1_genomic.fna.gz
GCF_000023185.1_ASM2318v1_genomic.fna.gz
GCF_000092045.1_ASM9204v1_genomic.fna.gz
GCF_000172695.2_ASM17269v2_genomic.fna.gz
GCF_000172715.1_ASM17271v1_genomic.fna.gz
GCF_000172715.2_ASM17271v2_genomic.fna.gz
GCF_000172735.1_ASM17273v1_genomic.fna.gz
GCF_000172755.1_ASM17275v1_genomic.fna.gz
GCF_000172775.1_ASM17277v1_genomic.fna.gz
GCF_000172795.2_ASM17279v2_genomic.fna.gz
GCF_000194195.1_RhECNPAF512_1.0_genomic.fna.gz
GCF_000247475.1_ASM24747v2_genomic.fna.gz
GCF_000268285.1_ASM26828v1_genomic.fna.gz
GCF_000268285.2_RPHCH2410v2_genomic.fna.gz
GCF_000271785.1_ASM27178v1_genomic.fna.gz
GCF_000271805.1_ASM27180v1_genomic.fna.gz
GCF_000271825.1_ASM27182v1_genomic.fna.gz
GCF_000271845.1_ASM27184v1_genomic.fna.gz
GCF_000281145.1_Rhizobium.strCF142_v1.0_genomic.fna.gz
GCF_000281735.1_ASM28173v1_genomic.fna.gz
GCF_000282035.1_CF122.fsa_genomic.fna.gz
GCF_000282095.2_Rhizobium.strCF080_v2.0_genomic.fna.gz
GCF_000292525.1_ASM29252v1_genomic.fna.gz
GCF_000295895.1_ASM29589v1_genomic.fna.gz
GCF_000298315.2_ASM29831v2_genomic.fna.gz
GCF_000312665.1_ASM31266v1_genomic.fna.gz
GCF_000330885.1_ASM33088v1_genomic.fna.gz
GCF_000359745.1_Rhizobium_sp._genomic.fna.gz
GCF_000371905.1_ASM37190v1_genomic.fna.gz
GCF_000372105.1_ASM37210v1_genomic.fna.gz
GCF_000372205.1_ASM37220v1_genomic.fna.gz
GCF_000372305.1_ASM37230v1_genomic.fna.gz
GCF_000373025.1_ASM37302v1_genomic.fna.gz
GCF_000373285.1_ASM37328v1_genomic.fna.gz
GCF_000373325.1_ASM37332v1_genomic.fna.gz
GCF_000373425.1_ASM37342v1_genomic.fna.gz
GCF_000375385.1_ASM37538v1_genomic.fna.gz
GCF_000375705.1_ASM37570v1_genomic.fna.gz
GCF_000376185.1_ASM37618v1_genomic.fna.gz
GCF_000377185.1_ASM37718v1_genomic.fna.gz
GCF_000377565.1_ASM37756v1_genomic.fna.gz
GCF_000379005.1_ASM37900v1_genomic.fna.gz
GCF_000379605.1_ASM37960v1_genomic.fna.gz
GCF_000385155.1_ASM38515v1_genomic.fna.gz
GCF_000419705.1_ASM41970v1_genomic.fna.gz
GCF_000419725.1_ASM41972v1_genomic.fna.gz
GCF_000419745.1_ASM41974v1_genomic.fna.gz
GCF_000419765.1_ASM41976v1_genomic.fna.gz
GCF_000419905.1_ASM41990v2_genomic.fna.gz
GCF_000426285.1_ASM42628v1_genomic.fna.gz
GCF_000427705.1_ASM42770v1_genomic.fna.gz
GCF_000427765.1_ASM42776v1_genomic.fna.gz
GCF_000427925.1_ASM42792v1_genomic.fna.gz
GCF_000427945.1_ASM42794v1_genomic.fna.gz
GCF_000427985.1_ASM42798v1_genomic.fna.gz
GCF_000428185.1_ASM42818v2_genomic.fna.gz
GCF_000430465.1_ASM43046v1_genomic.fna.gz
GCF_000430465.2_TA12020_genomic.fna.gz
GCF_000430465.3_TA12020_genomic.fna.gz
GCF_000438905.1_ASM43890v2_genomic.fna.gz
GCF_000442435.1_ASM44243v1_genomic.fna.gz
GCF_000464415.1_ASM46441v1_genomic.fna.gz
GCF_000483325.1_ASM48332v1_genomic.fna.gz
GCF_000483365.1_ASM48336v1_genomic.fna.gz
GCF_000483385.1_ASM48338v1_genomic.fna.gz
GCF_000484815.1_ASM48481v1_genomic.fna.gz
GCF_000484835.1_ASM48483v1_genomic.fna.gz
GCF_000485115.1_ASM48511v1_genomic.fna.gz
GCF_000485215.1_ASM48521v1_genomic.fna.gz
GCF_000485295.1_ASM48529v1_genomic.fna.gz
GCF_000485315.1_ASM48531v1_genomic.fna.gz
GCF_000499645.1_IRBG74_genomic.fna.gz
GCF_000510625.1_ASM51062v1_genomic.fna.gz
GCF_000515375.1_ASM51537v1_genomic.fna.gz
GCF_000517045.1_ASM51704v1_genomic.fna.gz
GCF_000517605.1_ASM51760v1_genomic.fna.gz
GCF_000518785.1_ASM51878v1_genomic.fna.gz
GCF_000520875.1_ASM52087v1_genomic.fna.gz
GCF_000577275.1_LPU83_genomic.fna.gz
GCF_000577275.2_LPU83_genomic.fna.gz
GCF_000621665.1_ASM62166v1_genomic.fna.gz
GCF_000698845.1_ASM69884v1_genomic.fna.gz
GCF_000705355.1_SOAPdenovo_for_version_1.05_of_Rhizobium_marinus_MGL06_genomic.fna.gz
GCF_000705615.1_CCGM1.1_genomic.fna.gz
GCF_000732195.1_ASM73219v1_genomic.fna.gz
GCF_000744505.1_ASM74450v1_genomic.fna.gz
GCF_000744565.1_ASM74456v1_genomic.fna.gz
GCF_000744575.1_ASM74457v1_genomic.fna.gz
GCF_000745255.1_ASM74525v1_genomic.fna.gz
GCF_000745575.1_ASM74557v1_genomic.fna.gz
GCF_000745655.1_ASM74565v1_genomic.fna.gz
GCF_000745785.1_ASM74578v1_genomic.fna.gz
GCF_000746265.1_ASM74626v1_genomic.fna.gz
GCF_000746325.1_ASM74632v1_genomic.fna.gz
GCF_000746335.1_ASM74633v1_genomic.fna.gz
GCF_000746385.1_ASM74638v1_genomic.fna.gz
GCF_000757525.1_RRTA_genomic.fna.gz
GCF_000758445.1_ASM75844v1_genomic.fna.gz
GCF_000769405.1_ASM76940v1_genomic.fna.gz
GCF_000769405.2_CC275e2020_genomic.fna.gz
GCF_000799755.1_ASM79975v1_genomic.fna.gz
GCF_000799775.1_ASM79977v1_genomic.fna.gz
GCF_000799845.1_ASM79984v1_genomic.fna.gz
GCF_000799895.1_ASM79989v1_genomic.fna.gz
GCF_000799925.1_ASM79992v1_genomic.fna.gz
GCF_000799945.1_ASM79994v1_genomic.fna.gz
GCF_000799975.1_ASM79997v1_genomic.fna.gz
GCF_000799985.1_ASM79998v1_genomic.fna.gz
GCF_000800135.1_ASM80013v1_genomic.fna.gz
GCF_000816125.1_ASM81612v1_genomic.fna.gz
GCF_000816845.1_ASM81684v1_genomic.fna.gz
GCF_000931365.1_ASM93136v1_genomic.fna.gz
GCF_000949865.1_ASM94986v1_genomic.fna.gz
GCF_000959075.1_ASM95907v1_genomic.fna.gz
GCF_000967425.1_ASM96742v1_genomic.fna.gz
GCF_001005825.1_ASM100582v1_genomic.fna.gz
GCF_001187535.1_ASM118753v1_genomic.fna.gz
GCF_001295785.1_ASM129578v1_genomic.fna.gz
GCF_001296045.1_ASM129604v1_genomic.fna.gz
GCF_001297245.1_ASM129724v1_genomic.fna.gz
GCF_001421235.1_Leaf202_genomic.fna.gz
GCF_001421985.1_Leaf68_genomic.fna.gz
GCF_001422245.1_Leaf262_genomic.fna.gz
GCF_001423215.1_Leaf321_genomic.fna.gz
GCF_001423425.1_Leaf306_genomic.fna.gz
GCF_001423445.1_Leaf311_genomic.fna.gz
GCF_001424045.1_Leaf371_genomic.fna.gz
GCF_001424065.1_Leaf384_genomic.fna.gz
GCF_001424085.1_Leaf386_genomic.fna.gz
GCF_001424245.1_Leaf155_genomic.fna.gz
GCF_001424325.1_Leaf341_genomic.fna.gz
GCF_001424505.1_Leaf391_genomic.fna.gz
GCF_001424945.1_Root1203_genomic.fna.gz
GCF_001424965.1_Root1204_genomic.fna.gz
GCF_001424985.1_Root1212_genomic.fna.gz
GCF_001425145.1_Root1240_genomic.fna.gz
GCF_001425345.1_Leaf383_genomic.fna.gz
GCF_001425605.1_Leaf453_genomic.fna.gz
GCF_001426265.1_Root1220_genomic.fna.gz
GCF_001426565.1_Root482_genomic.fna.gz
GCF_001426665.1_Root1334_genomic.fna.gz
GCF_001426685.1_Root483D2_genomic.fna.gz
GCF_001427205.1_Root491_genomic.fna.gz
GCF_001427345.1_Root149_genomic.fna.gz
GCF_001427405.1_Root564_genomic.fna.gz
GCF_001427625.1_Root651_genomic.fna.gz
GCF_001428925.1_Root268_genomic.fna.gz
GCF_001429075.1_Root73_genomic.fna.gz
GCF_001429245.1_Root274_genomic.fna.gz
GCF_001429725.1_Root708_genomic.fna.gz
GCF_001542405.1_ASM154240v1_genomic.fna.gz
GCF_001612535.1_ASM161253v1_genomic.fna.gz
GCF_001632995.1_ASM163299v1_genomic.fna.gz
GCF_001644925.1_GHKF11_genomic.fna.gz
GCF_001652265.1_ASM165226v1_genomic.fna.gz
GCF_001657485.1_ASM165748v1_genomic.fna.gz
GCF_001662055.1_ASM166205v1_genomic.fna.gz
GCF_001662075.1_ASM166207v1_genomic.fna.gz
GCF_001662105.1_ASM166210v1_genomic.fna.gz
GCF_001662125.1_ASM166212v1_genomic.fna.gz
GCF_001664085.1_ASM166408v1_genomic.fna.gz
GCF_001664105.1_ASM166410v1_genomic.fna.gz
GCF_001664125.1_ASM166412v1_genomic.fna.gz
GCF_001664145.1_ASM166414v1_genomic.fna.gz
GCF_001664165.1_ASM166416v1_genomic.fna.gz
GCF_001664185.1_ASM166418v1_genomic.fna.gz
GCF_001664205.1_ASM166420v1_genomic.fna.gz
GCF_001664225.1_ASM166422v1_genomic.fna.gz
GCF_001664245.1_ASM166424v1_genomic.fna.gz
GCF_001664265.1_ASM166426v1_genomic.fna.gz
GCF_001664285.1_ASM166428v1_genomic.fna.gz
GCF_001664305.1_ASM166430v1_genomic.fna.gz
GCF_001664325.1_ASM166432v1_genomic.fna.gz
GCF_001664345.1_ASM166434v1_genomic.fna.gz
GCF_001664365.1_ASM166436v1_genomic.fna.gz
GCF_001664385.1_ASM166438v1_genomic.fna.gz
GCF_001664405.1_ASM166440v1_genomic.fna.gz
GCF_001664425.1_ASM166442v1_genomic.fna.gz
GCF_001664445.1_ASM166444v1_genomic.fna.gz
GCF_001664465.1_ASM166446v1_genomic.fna.gz
GCF_001664485.1_ASM166448v1_genomic.fna.gz
GCF_001664525.1_ASM166452v1_genomic.fna.gz
GCF_001664545.1_ASM166454v1_genomic.fna.gz
GCF_001675075.1_ASM167507v1_genomic.fna.gz
GCF_001675095.1_ASM167509v1_genomic.fna.gz
GCF_001675175.1_ASM167517v1_genomic.fna.gz
GCF_001679565.1_ASM167956v1_genomic.fna.gz
GCF_001679785.1_ASM167978v1_genomic.fna.gz
GCF_001691455.1_ASM169145v1_genomic.fna.gz
GCF_001692185.1_ASM169218v1_genomic.fna.gz
GCF_001692325.1_ASM169232v1_genomic.fna.gz
GCF_001729315.1_ASM172931v1_genomic.fna.gz
GCF_001854685.1_ASM185468v1_genomic.fna.gz
GCF_001854865.1_ASM185486v1_genomic.fna.gz
GCF_001885575.1_ASM188557v1_genomic.fna.gz
GCF_001888145.1_ASM188814v1_genomic.fna.gz
GCF_001888225.1_ASM188822v1_genomic.fna.gz
GCF_001890425.1_ASM189042v1_genomic.fna.gz
GCF_001908375.1_ASM190837v1_genomic.fna.gz
GCF_001908615.1_ASM190861v1_genomic.fna.gz
GCF_001927265.1_ASM192726v1_genomic.fna.gz
GCF_001931685.1_ASM193168v1_genomic.fna.gz
GCF_001938935.1_ASM193893v1_genomic.fna.gz
GCF_001938945.1_ASM193894v1_genomic.fna.gz
GCF_001938985.1_ASM193898v1_genomic.fna.gz
GCF_001939045.1_ASM193904v1_genomic.fna.gz
GCF_001950375.1_TBD182_assembly01_genomic.fna.gz
GCF_001999485.1_ASM199948v1_genomic.fna.gz
GCF_001999485.2_ASM199948v2_genomic.fna.gz
GCF_002000045.1_ASM200004v1_genomic.fna.gz
GCF_002008155.1_ASM200815v1_genomic.fna.gz
GCF_002008165.1_ASM200816v1_genomic.fna.gz
GCF_002008275.1_ASM200827v1_genomic.fna.gz
GCF_002008365.1_ASM200836v1_genomic.fna.gz
GCF_002078095.1_ASM207809v1_genomic.fna.gz
GCF_002117485.1_ASM211748v1_genomic.fna.gz
GCF_002117725.1_ASM211772v1_genomic.fna.gz
GCF_002119845.1_ASM211984v1_genomic.fna.gz
GCF_002204185.1_ASM220418v1_genomic.fna.gz
GCF_002211285.1_ASM221128v1_genomic.fna.gz
GCF_002211295.1_ASM221129v1_genomic.fna.gz
GCF_002211305.1_ASM221130v1_genomic.fna.gz
GCF_002211315.1_ASM221131v1_genomic.fna.gz
GCF_002211365.1_ASM221136v1_genomic.fna.gz
GCF_002211385.1_ASM221138v1_genomic.fna.gz
GCF_002211395.1_ASM221139v1_genomic.fna.gz
GCF_002240185.1_ASM224018v1_genomic.fna.gz
GCF_002243365.1_ASM224336v1_genomic.fna.gz
GCF_002245285.1_ASM224528v1_genomic.fna.gz
GCF_002277895.1_ASM227789v1_genomic.fna.gz
GCF_002355115.1_ASM235511v1_genomic.fna.gz
GCF_002406495.1_L101_genomic.fna.gz
GCF_002406505.1_JJW1_genomic.fna.gz
GCF_002531595.1_ASM253159v1_genomic.fna.gz
GCF_002531615.1_ASM253161v1_genomic.fna.gz
GCF_002531635.1_ASM253163v1_genomic.fna.gz
GCF_002531645.1_ASM253164v1_genomic.fna.gz
GCF_002531655.1_ASM253165v1_genomic.fna.gz
GCF_002531695.1_ASM253169v1_genomic.fna.gz
GCF_002531715.1_ASM253171v1_genomic.fna.gz
GCF_002531725.1_ASM253172v1_genomic.fna.gz
GCF_002531755.1_ASM253175v1_genomic.fna.gz
GCF_002531755.2_ASM253175v2_genomic.fna.gz
GCF_002531775.1_ASM253177v1_genomic.fna.gz
GCF_002531795.1_ASM253179v1_genomic.fna.gz
GCF_002531805.1_ASM253180v1_genomic.fna.gz
GCF_002531825.1_ASM253182v1_genomic.fna.gz
GCF_002531855.1_ASM253185v1_genomic.fna.gz
GCF_002531885.1_ASM253188v1_genomic.fna.gz
GCF_002531905.1_ASM253190v1_genomic.fna.gz
GCF_002531935.1_ASM253193v1_genomic.fna.gz
GCF_002531955.1_ASM253195v1_genomic.fna.gz
GCF_002600635.1_ASM260063v1_genomic.fna.gz
GCF_002812325.1_ASM281232v1_genomic.fna.gz
GCF_002814035.1_ASM281403v1_genomic.fna.gz
GCF_002855515.1_ASM285551v1_genomic.fna.gz
GCF_002894505.1_ASM289450v1_genomic.fna.gz
GCF_002914525.1_ASM291452v1_genomic.fna.gz
GCF_002933635.1_ASM293363v1_genomic.fna.gz
GCF_002944315.1_ASM294431v1_genomic.fna.gz
GCF_002948295.1_ASM294829v1_genomic.fna.gz
GCF_002953715.1_ASM295371v1_genomic.fna.gz
GCF_003001755.1_ASM300175v1_genomic.fna.gz
GCF_003013335.1_ASM301333v1_genomic.fna.gz
GCF_003024605.1_ASM302460v1_genomic.fna.gz
GCF_003025035.1_ASM302503v1_genomic.fna.gz
GCF_003031555.1_ASM303155v1_genomic.fna.gz
GCF_003031575.1_ASM303157v1_genomic.fna.gz
GCF_003053405.1_ASM305340v1_genomic.fna.gz
GCF_003058385.1_ASM305838v1_genomic.fna.gz
GCF_003122325.1_ASM312232v1_genomic.fna.gz
GCF_003150695.1_ASM315069v1_genomic.fna.gz
GCF_003205195.1_ASM320519v1_genomic.fna.gz
GCF_003208455.1_ASM320845v1_genomic.fna.gz
GCF_003217095.1_ASM321709v1_genomic.fna.gz
GCF_003217115.1_ASM321711v1_genomic.fna.gz
GCF_003217135.1_ASM321713v1_genomic.fna.gz
GCF_003217305.1_ASM321730v1_genomic.fna.gz
GCF_003240565.1_ASM324056v1_genomic.fna.gz
GCF_003240585.1_ASM324058v1_genomic.fna.gz
GCF_003259755.1_ASM325975v1_genomic.fna.gz
GCF_003269135.1_ASM326913v1_genomic.fna.gz
GCF_003287875.1_ASM328787v1_genomic.fna.gz
GCF_003290405.1_ASM329040v1_genomic.fna.gz
GCF_003351165.1_ASM335116v1_genomic.fna.gz
GCF_003351175.1_ASM335117v1_genomic.fna.gz
GCF_003351185.1_ASM335118v1_genomic.fna.gz
GCF_003400085.1_ASM340008v1_genomic.fna.gz
GCF_003400105.1_ASM340010v1_genomic.fna.gz
GCF_003400125.1_ASM340012v1_genomic.fna.gz
GCF_003425685.1_ASM342568v1_genomic.fna.gz
GCF_003610155.1_ASM361015v1_genomic.fna.gz
GCF_003610655.1_ASM361065v1_genomic.fna.gz
GCF_003627755.1_ASM362775v1_genomic.fna.gz
GCF_003627775.1_ASM362777v1_genomic.fna.gz
GCF_003627795.1_ASM362779v1_genomic.fna.gz
GCF_003938655.1_ASM393865v1_genomic.fna.gz
GCF_003939025.1_ASM393902v1_genomic.fna.gz
GCF_003985125.1_ASM398512v1_genomic.fna.gz
GCF_003985135.1_ASM398513v1_genomic.fna.gz
GCF_003985145.1_ASM398514v1_genomic.fna.gz
GCF_003985155.1_ASM398515v1_genomic.fna.gz
GCF_003985205.1_ASM398520v1_genomic.fna.gz
GCF_004016565.1_ASM401656v1_genomic.fna.gz
GCF_004028055.1_ASM402805v1_genomic.fna.gz
GCF_004028065.1_ASM402806v1_genomic.fna.gz
GCF_004028075.1_ASM402807v1_genomic.fna.gz
GCF_004028085.1_ASM402808v1_genomic.fna.gz
GCF_004028185.1_WSM448_genomic.fna.gz
GCF_004053875.1_ASM405387v1_genomic.fna.gz
GCF_004054135.1_ASM405413v1_genomic.fna.gz
GCF_004054145.1_ASM405414v1_genomic.fna.gz
GCF_004054165.1_ASM405416v1_genomic.fna.gz
GCF_004123835.1_ASM412383v1_genomic.fna.gz
GCF_004216975.1_ASM421697v1_genomic.fna.gz
GCF_004303115.1_ASM430311v1_genomic.fna.gz
GCF_004303125.1_ASM430312v1_genomic.fna.gz
GCF_004303135.1_ASM430313v1_genomic.fna.gz
GCF_004303145.1_ASM430314v1_genomic.fna.gz
GCF_004303155.1_ASM430315v1_genomic.fna.gz
GCF_004303215.1_ASM430321v1_genomic.fna.gz
GCF_004303225.1_ASM430322v1_genomic.fna.gz
GCF_004303245.1_ASM430324v1_genomic.fna.gz
GCF_004303255.1_ASM430325v1_genomic.fna.gz
GCF_004303275.1_ASM430327v1_genomic.fna.gz
GCF_004303315.1_ASM430331v1_genomic.fna.gz
GCF_004303335.1_ASM430333v1_genomic.fna.gz
GCF_004303345.1_ASM430334v1_genomic.fna.gz
GCF_004303365.1_ASM430336v1_genomic.fna.gz
GCF_004303385.1_ASM430338v1_genomic.fna.gz
GCF_004303415.1_ASM430341v1_genomic.fna.gz
GCF_004303425.1_ASM430342v1_genomic.fna.gz
GCF_004303445.1_ASM430344v1_genomic.fna.gz
GCF_004303455.1_ASM430345v1_genomic.fna.gz
GCF_004303465.1_ASM430346v1_genomic.fna.gz
GCF_004303515.1_ASM430351v1_genomic.fna.gz
GCF_004303525.1_ASM430352v1_genomic.fna.gz
GCF_004303535.1_ASM430353v1_genomic.fna.gz
GCF_004303545.1_ASM430354v1_genomic.fna.gz
GCF_004303575.1_ASM430357v1_genomic.fna.gz
GCF_004303615.1_ASM430361v1_genomic.fna.gz
GCF_004303625.1_ASM430362v1_genomic.fna.gz
GCF_004303635.1_ASM430363v1_genomic.fna.gz
GCF_004303655.1_ASM430365v1_genomic.fna.gz
GCF_004303685.1_ASM430368v1_genomic.fna.gz
GCF_004303715.1_ASM430371v1_genomic.fna.gz
GCF_004303735.1_ASM430373v1_genomic.fna.gz
GCF_004303745.1_ASM430374v1_genomic.fna.gz
GCF_004303755.1_ASM430375v1_genomic.fna.gz
GCF_004303775.1_ASM430377v1_genomic.fna.gz
GCF_004303815.1_ASM430381v1_genomic.fna.gz
GCF_004303835.1_ASM430383v1_genomic.fna.gz
GCF_004303845.1_ASM430384v1_genomic.fna.gz
GCF_004303875.1_ASM430387v1_genomic.fna.gz
GCF_004303885.1_ASM430388v1_genomic.fna.gz
GCF_004303915.1_ASM430391v1_genomic.fna.gz
GCF_004303925.1_ASM430392v1_genomic.fna.gz
GCF_004303945.1_ASM430394v1_genomic.fna.gz
GCF_004303975.1_ASM430397v1_genomic.fna.gz
GCF_004303985.1_ASM430398v1_genomic.fna.gz
GCF_004303995.1_ASM430399v1_genomic.fna.gz
GCF_004304035.1_ASM430403v1_genomic.fna.gz
GCF_004304055.1_ASM430405v1_genomic.fna.gz
GCF_004304065.1_ASM430406v1_genomic.fna.gz
GCF_004304085.1_ASM430408v1_genomic.fna.gz
GCF_004304105.1_ASM430410v1_genomic.fna.gz
GCF_004304125.1_ASM430412v1_genomic.fna.gz
GCF_004304155.1_ASM430415v1_genomic.fna.gz
GCF_004304165.1_ASM430416v1_genomic.fna.gz
GCF_004304175.1_ASM430417v1_genomic.fna.gz
GCF_004304215.1_ASM430421v1_genomic.fna.gz
GCF_004304235.1_ASM430423v1_genomic.fna.gz
GCF_004304245.1_ASM430424v1_genomic.fna.gz
GCF_004304255.1_ASM430425v1_genomic.fna.gz
GCF_004304265.1_ASM430426v1_genomic.fna.gz
GCF_004304285.1_ASM430428v1_genomic.fna.gz
GCF_004304335.1_ASM430433v1_genomic.fna.gz
GCF_004304355.1_ASM430435v1_genomic.fna.gz
GCF_004304365.1_ASM430436v1_genomic.fna.gz
GCF_004304375.1_ASM430437v1_genomic.fna.gz
GCF_004304385.1_ASM430438v1_genomic.fna.gz
GCF_004304435.1_ASM430443v1_genomic.fna.gz
GCF_004304455.1_ASM430445v1_genomic.fna.gz
GCF_004304465.1_ASM430446v1_genomic.fna.gz
GCF_004304475.1_ASM430447v1_genomic.fna.gz
GCF_004304495.1_ASM430449v1_genomic.fna.gz
GCF_004304535.1_ASM430453v1_genomic.fna.gz
GCF_004304555.1_ASM430455v1_genomic.fna.gz
GCF_004304575.1_ASM430457v1_genomic.fna.gz
GCF_004304585.1_ASM430458v1_genomic.fna.gz
GCF_004304595.1_ASM430459v1_genomic.fna.gz
GCF_004304635.1_ASM430463v1_genomic.fna.gz
GCF_004304645.1_ASM430464v1_genomic.fna.gz
GCF_004304665.1_ASM430466v1_genomic.fna.gz
GCF_004304685.1_ASM430468v1_genomic.fna.gz
GCF_004304705.1_ASM430470v1_genomic.fna.gz
GCF_004304735.1_ASM430473v1_genomic.fna.gz
GCF_004304745.1_ASM430474v1_genomic.fna.gz
GCF_004304755.1_ASM430475v1_genomic.fna.gz
GCF_004304775.1_ASM430477v1_genomic.fna.gz
GCF_004304815.1_ASM430481v1_genomic.fna.gz
GCF_004304835.1_ASM430483v1_genomic.fna.gz
GCF_004304845.1_ASM430484v1_genomic.fna.gz
GCF_004304855.1_ASM430485v1_genomic.fna.gz
GCF_004304885.1_ASM430488v1_genomic.fna.gz
GCF_004304905.1_ASM430490v1_genomic.fna.gz
GCF_004304935.1_ASM430493v1_genomic.fna.gz
GCF_004304955.1_ASM430495v1_genomic.fna.gz
GCF_004304965.1_ASM430496v1_genomic.fna.gz
GCF_004304975.1_ASM430497v1_genomic.fna.gz
GCF_004305005.1_ASM430500v1_genomic.fna.gz
GCF_004305025.1_ASM430502v1_genomic.fna.gz
GCF_004305055.1_ASM430505v1_genomic.fna.gz
GCF_004305075.1_ASM430507v1_genomic.fna.gz
GCF_004305085.1_ASM430508v1_genomic.fna.gz
GCF_004305095.1_ASM430509v1_genomic.fna.gz
GCF_004305105.1_ASM430510v1_genomic.fna.gz
GCF_004305145.1_ASM430514v1_genomic.fna.gz
GCF_004305175.1_ASM430517v1_genomic.fna.gz
GCF_004305185.1_ASM430518v1_genomic.fna.gz
GCF_004305195.1_ASM430519v1_genomic.fna.gz
GCF_004305235.1_ASM430523v1_genomic.fna.gz
GCF_004305255.1_ASM430525v1_genomic.fna.gz
GCF_004305265.1_ASM430526v1_genomic.fna.gz
GCF_004305295.1_ASM430529v1_genomic.fna.gz
GCF_004305305.1_ASM430530v1_genomic.fna.gz
GCF_004305315.1_ASM430531v1_genomic.fna.gz
GCF_004305365.1_ASM430536v1_genomic.fna.gz
GCF_004305375.1_ASM430537v1_genomic.fna.gz
GCF_004305395.1_ASM430539v1_genomic.fna.gz
GCF_004305435.1_ASM430543v1_genomic.fna.gz
GCF_004305455.1_ASM430545v1_genomic.fna.gz
GCF_004305475.1_ASM430547v1_genomic.fna.gz
GCF_004305485.1_ASM430548v1_genomic.fna.gz
GCF_004305495.1_ASM430549v1_genomic.fna.gz
GCF_004305515.1_ASM430551v1_genomic.fna.gz
GCF_004305545.1_ASM430554v1_genomic.fna.gz
GCF_004305575.1_ASM430557v1_genomic.fna.gz
GCF_004305595.1_ASM430559v1_genomic.fna.gz
GCF_004305605.1_ASM430560v1_genomic.fna.gz
GCF_004305615.1_ASM430561v1_genomic.fna.gz
GCF_004305625.1_ASM430562v1_genomic.fna.gz
GCF_004305675.1_ASM430567v1_genomic.fna.gz
GCF_004305685.1_ASM430568v1_genomic.fna.gz
GCF_004305715.1_ASM430571v1_genomic.fna.gz
GCF_004305755.1_ASM430575v1_genomic.fna.gz
GCF_004305765.1_ASM430576v1_genomic.fna.gz
GCF_004305795.1_ASM430579v1_genomic.fna.gz
GCF_004305815.1_ASM430581v1_genomic.fna.gz
GCF_004305825.1_ASM430582v1_genomic.fna.gz
GCF_004305845.1_ASM430584v1_genomic.fna.gz
GCF_004305865.1_ASM430586v1_genomic.fna.gz
GCF_004305895.1_ASM430589v1_genomic.fna.gz
GCF_004305915.1_ASM430591v1_genomic.fna.gz
GCF_004305935.1_ASM430593v1_genomic.fna.gz
GCF_004305945.1_ASM430594v1_genomic.fna.gz
GCF_004306015.1_ASM430601v1_genomic.fna.gz
GCF_004306055.1_ASM430605v1_genomic.fna.gz
GCF_004306065.1_ASM430606v1_genomic.fna.gz
GCF_004306075.1_ASM430607v1_genomic.fna.gz
GCF_004306095.1_ASM430609v1_genomic.fna.gz
GCF_004306165.1_ASM430616v1_genomic.fna.gz
GCF_004306175.1_ASM430617v1_genomic.fna.gz
GCF_004306185.1_ASM430618v1_genomic.fna.gz
GCF_004306225.1_ASM430622v1_genomic.fna.gz
GCF_004306245.1_ASM430624v1_genomic.fna.gz
GCF_004306275.1_ASM430627v1_genomic.fna.gz
GCF_004306285.1_ASM430628v1_genomic.fna.gz
GCF_004306305.1_ASM430630v1_genomic.fna.gz
GCF_004306325.1_ASM430632v1_genomic.fna.gz
GCF_004306355.1_ASM430635v1_genomic.fna.gz
GCF_004306365.1_ASM430636v1_genomic.fna.gz
GCF_004306385.1_ASM430638v1_genomic.fna.gz
GCF_004306415.1_ASM430641v1_genomic.fna.gz
GCF_004306425.1_ASM430642v1_genomic.fna.gz
GCF_004306455.1_ASM430645v1_genomic.fna.gz
GCF_004306475.1_ASM430647v1_genomic.fna.gz
GCF_004306485.1_ASM430648v1_genomic.fna.gz
GCF_004306495.1_ASM430649v1_genomic.fna.gz
GCF_004306515.1_ASM430651v1_genomic.fna.gz
GCF_004306555.1_ASM430655v1_genomic.fna.gz
GCF_004306575.1_ASM430657v1_genomic.fna.gz
GCF_004306595.1_ASM430659v1_genomic.fna.gz
GCF_004306605.1_ASM430660v1_genomic.fna.gz
GCF_004306615.1_ASM430661v1_genomic.fna.gz
GCF_004306655.1_ASM430665v1_genomic.fna.gz
GCF_004306675.1_ASM430667v1_genomic.fna.gz
GCF_004306695.1_ASM430669v1_genomic.fna.gz
GCF_004306705.1_ASM430670v1_genomic.fna.gz
GCF_004306715.1_ASM430671v1_genomic.fna.gz
GCF_004306755.1_ASM430675v1_genomic.fna.gz
GCF_004306775.1_ASM430677v1_genomic.fna.gz
GCF_004306785.1_ASM430678v1_genomic.fna.gz
GCF_004306805.1_ASM430680v1_genomic.fna.gz
GCF_004306815.1_ASM430681v1_genomic.fna.gz
GCF_004306835.1_ASM430683v1_genomic.fna.gz
GCF_004306875.1_ASM430687v1_genomic.fna.gz
GCF_004306885.1_ASM430688v1_genomic.fna.gz
GCF_004306915.1_ASM430691v1_genomic.fna.gz
GCF_004306925.1_ASM430692v1_genomic.fna.gz
GCF_004307025.1_ASM430702v1_genomic.fna.gz
GCF_004307035.1_ASM430703v1_genomic.fna.gz
GCF_004307045.1_ASM430704v1_genomic.fna.gz
GCF_004307125.1_ASM430712v1_genomic.fna.gz
GCF_004307135.1_ASM430713v1_genomic.fna.gz
GCF_004307165.1_ASM430716v1_genomic.fna.gz
GCF_004307185.1_ASM430718v1_genomic.fna.gz
GCF_004307195.1_ASM430719v1_genomic.fna.gz
GCF_004322895.1_ASM432289v1_genomic.fna.gz
GCF_004322915.1_ASM432291v1_genomic.fna.gz
GCF_004322935.1_ASM432293v1_genomic.fna.gz
GCF_004329775.1_ASM432977v1_genomic.fna.gz
GCF_004329785.1_ASM432978v1_genomic.fna.gz
GCF_004329795.1_ASM432979v1_genomic.fna.gz
GCF_004329805.1_ASM432980v1_genomic.fna.gz
GCF_004329875.1_ASM432987v1_genomic.fna.gz
GCF_004329885.1_ASM432988v1_genomic.fna.gz
GCF_004329895.1_ASM432989v1_genomic.fna.gz
GCF_004329905.1_ASM432990v1_genomic.fna.gz
GCF_004329915.1_ASM432991v1_genomic.fna.gz
GCF_004329975.1_ASM432997v1_genomic.fna.gz
GCF_004329985.1_ASM432998v1_genomic.fna.gz
GCF_004329995.1_ASM432999v1_genomic.fna.gz
GCF_004330005.1_ASM433000v1_genomic.fna.gz
GCF_004330015.1_ASM433001v1_genomic.fna.gz
GCF_004330075.1_ASM433007v1_genomic.fna.gz
GCF_004330085.1_ASM433008v1_genomic.fna.gz
GCF_004330095.1_ASM433009v1_genomic.fna.gz
GCF_004330105.1_ASM433010v1_genomic.fna.gz
GCF_004330135.1_ASM433013v1_genomic.fna.gz
GCF_004330175.1_ASM433017v1_genomic.fna.gz
GCF_004330185.1_ASM433018v1_genomic.fna.gz
GCF_004330205.1_ASM433020v1_genomic.fna.gz
GCF_004330225.1_ASM433022v1_genomic.fna.gz
GCF_004330235.1_ASM433023v1_genomic.fna.gz
GCF_004330265.1_ASM433026v1_genomic.fna.gz
GCF_004330515.1_ASM433051v1_genomic.fna.gz
GCF_004330525.1_ASM433052v1_genomic.fna.gz
GCF_004330535.1_ASM433053v1_genomic.fna.gz
GCF_004330545.1_ASM433054v1_genomic.fna.gz
GCF_004330555.1_ASM433055v1_genomic.fna.gz
GCF_004330615.1_ASM433061v1_genomic.fna.gz
GCF_004330625.1_ASM433062v1_genomic.fna.gz
GCF_004330635.1_ASM433063v1_genomic.fna.gz
GCF_004330645.1_ASM433064v1_genomic.fna.gz
GCF_004330655.1_ASM433065v1_genomic.fna.gz
GCF_004330715.1_ASM433071v1_genomic.fna.gz
GCF_004330725.1_ASM433072v1_genomic.fna.gz
GCF_004330735.1_ASM433073v1_genomic.fna.gz
GCF_004330745.1_ASM433074v1_genomic.fna.gz
GCF_004330755.1_ASM433075v1_genomic.fna.gz
GCF_004330815.1_ASM433081v1_genomic.fna.gz
GCF_004330835.1_ASM433083v1_genomic.fna.gz
GCF_004330845.1_ASM433084v1_genomic.fna.gz
GCF_004330855.1_ASM433085v1_genomic.fna.gz
GCF_004330865.1_ASM433086v1_genomic.fna.gz
GCF_004330915.1_ASM433091v1_genomic.fna.gz
GCF_004330935.1_ASM433093v1_genomic.fna.gz
GCF_004330945.1_ASM433094v1_genomic.fna.gz
GCF_004330955.1_ASM433095v1_genomic.fna.gz
GCF_004330975.1_ASM433097v1_genomic.fna.gz
GCF_004341105.1_ASM434110v1_genomic.fna.gz
GCF_004341455.1_ASM434145v1_genomic.fna.gz
GCF_004341575.1_ASM434157v1_genomic.fna.gz
GCF_004341625.1_ASM434162v1_genomic.fna.gz
GCF_004341765.1_ASM434176v1_genomic.fna.gz
GCF_004341955.1_ASM434195v1_genomic.fna.gz
GCF_004342325.1_ASM434232v1_genomic.fna.gz
GCF_004342335.1_ASM434233v1_genomic.fna.gz
GCF_004342645.1_ASM434264v1_genomic.fna.gz
GCF_004342945.1_ASM434294v1_genomic.fna.gz
GCF_004343265.1_ASM434326v1_genomic.fna.gz
GCF_004343445.1_ASM434344v1_genomic.fna.gz
GCF_004345245.1_ASM434524v1_genomic.fna.gz
GCF_004345405.1_ASM434540v1_genomic.fna.gz
GCF_004345965.1_ASM434596v1_genomic.fna.gz
GCF_004346285.1_ASM434628v1_genomic.fna.gz
GCF_004358025.1_ASM435802v1_genomic.fna.gz
GCF_004362445.1_ASM436244v1_genomic.fna.gz
GCF_004365425.1_ASM436542v1_genomic.fna.gz
GCF_004766495.1_ASM476649v1_genomic.fna.gz
GCF_004766515.1_ASM476651v1_genomic.fna.gz
GCF_004766535.1_ASM476653v1_genomic.fna.gz
GCF_004912135.1_ASM491213v1_genomic.fna.gz
GCF_004912145.1_ASM491214v1_genomic.fna.gz
GCF_004912165.1_ASM491216v1_genomic.fna.gz
GCF_005144405.1_ASM514440v1_genomic.fna.gz
GCF_005221365.1_ASM522136v1_genomic.fna.gz
GCF_005222835.1_ASM522283v1_genomic.fna.gz
GCF_005222845.1_ASM522284v1_genomic.fna.gz
GCF_005222915.1_ASM522291v1_genomic.fna.gz
GCF_005298145.1_ASM529814v1_genomic.fna.gz
GCF_005860795.1_ASM586079v1_genomic.fna.gz
GCF_005860795.2_ASM586079v2_genomic.fna.gz
GCF_005860925.1_ASM586092v1_genomic.fna.gz
GCF_005860925.2_ASM586092v2_genomic.fna.gz
GCF_005862185.1_ASM586218v1_genomic.fna.gz
GCF_005862185.2_ASM586218v2_genomic.fna.gz
GCF_005862215.1_ASM586221v1_genomic.fna.gz
GCF_005862305.1_ASM586230v1_genomic.fna.gz
GCF_005862305.2_ASM586230v2_genomic.fna.gz
GCF_005938205.1_ASM593820v1_genomic.fna.gz
GCF_006335145.1_ASM633514v1_genomic.fna.gz
GCF_006443685.1_ASM644368v1_genomic.fna.gz
GCF_006517835.1_ASM651783v1_genomic.fna.gz
GCF_006716665.1_ASM671666v1_genomic.fna.gz
GCF_007000305.1_ASM700030v1_genomic.fna.gz
GCF_007000315.1_ASM700031v1_genomic.fna.gz
GCF_007000325.1_ASM700032v1_genomic.fna.gz
GCF_007004135.1_ASM700413v1_genomic.fna.gz
GCF_007827505.1_ASM782750v1_genomic.fna.gz
GCF_007827995.1_ASM782799v1_genomic.fna.gz
GCF_007828365.1_ASM782836v1_genomic.fna.gz
GCF_007828395.1_ASM782839v1_genomic.fna.gz
GCF_007828675.1_ASM782867v1_genomic.fna.gz
GCF_007829155.1_ASM782915v1_genomic.fna.gz
GCF_007829235.1_ASM782923v1_genomic.fna.gz
GCF_007992095.1_ASM799209v1_genomic.fna.gz
GCF_008000915.1_ASM800091v1_genomic.fna.gz
GCF_008370325.1_ASM837032v1_genomic.fna.gz
GCF_008919455.1_ASM891945v1_genomic.fna.gz
GCF_009176305.1_ASM917630v1_genomic.fna.gz
GCF_009176325.1_ASM917632v1_genomic.fna.gz
GCF_009498215.1_ASM949821v1_genomic.fna.gz
GCF_009498525.1_ASM949852v1_genomic.fna.gz
GCF_009649115.1_ASM964911v1_genomic.fna.gz
GCF_009755765.1_ASM975576v1_genomic.fna.gz
GCF_009905715.1_ASM990571v1_genomic.fna.gz
GCF_010119525.1_ASM1011952v1_genomic.fna.gz
GCF_010365265.1_ASM1036526v1_genomic.fna.gz
GCF_010450895.1_ASM1045089v1_genomic.fna.gz
GCF_010668055.1_ASM1066805v1_genomic.fna.gz
GCF_010668065.1_ASM1066806v1_genomic.fna.gz
GCF_010668085.1_ASM1066808v1_genomic.fna.gz
GCF_010668125.1_ASM1066812v1_genomic.fna.gz
GCF_010668145.1_ASM1066814v1_genomic.fna.gz
GCF_010668165.1_ASM1066816v1_genomic.fna.gz
GCF_010668175.1_ASM1066817v1_genomic.fna.gz
GCF_010668195.1_ASM1066819v1_genomic.fna.gz
GCF_010668215.1_ASM1066821v1_genomic.fna.gz
GCF_010668245.1_ASM1066824v1_genomic.fna.gz
GCF_010668265.1_ASM1066826v1_genomic.fna.gz
GCF_010668275.1_ASM1066827v1_genomic.fna.gz
GCF_010668285.1_ASM1066828v1_genomic.fna.gz
GCF_010668315.1_ASM1066831v1_genomic.fna.gz
GCF_010668345.1_ASM1066834v1_genomic.fna.gz
GCF_010668355.1_ASM1066835v1_genomic.fna.gz
GCF_010668385.1_ASM1066838v1_genomic.fna.gz
GCF_010668395.1_ASM1066839v1_genomic.fna.gz
GCF_010668425.1_ASM1066842v1_genomic.fna.gz
GCF_010668445.1_ASM1066844v1_genomic.fna.gz
GCF_010668465.1_ASM1066846v1_genomic.fna.gz
GCF_010668475.1_ASM1066847v1_genomic.fna.gz
GCF_010668505.1_ASM1066850v1_genomic.fna.gz
GCF_010668515.1_ASM1066851v1_genomic.fna.gz
GCF_010668555.1_ASM1066855v1_genomic.fna.gz
GCF_010668585.1_ASM1066858v1_genomic.fna.gz
GCF_010668605.1_ASM1066860v1_genomic.fna.gz
GCF_010668625.1_ASM1066862v1_genomic.fna.gz
GCF_010668635.1_ASM1066863v1_genomic.fna.gz
GCF_010668665.1_ASM1066866v1_genomic.fna.gz
GCF_010668685.1_ASM1066868v1_genomic.fna.gz
GCF_010668705.1_ASM1066870v1_genomic.fna.gz
GCF_010668715.1_ASM1066871v1_genomic.fna.gz
GCF_010668735.1_ASM1066873v1_genomic.fna.gz
GCF_010668765.1_ASM1066876v1_genomic.fna.gz
GCF_010668785.1_ASM1066878v1_genomic.fna.gz
GCF_010668805.1_ASM1066880v1_genomic.fna.gz
GCF_010668825.1_ASM1066882v1_genomic.fna.gz
GCF_010668835.1_ASM1066883v1_genomic.fna.gz
GCF_010668865.1_ASM1066886v1_genomic.fna.gz
GCF_010668875.1_ASM1066887v1_genomic.fna.gz
GCF_010668905.1_ASM1066890v1_genomic.fna.gz
GCF_010668925.1_ASM1066892v1_genomic.fna.gz
GCF_010668945.1_ASM1066894v1_genomic.fna.gz
GCF_010669145.1_ASM1066914v1_genomic.fna.gz
GCF_010815565.1_ASM1081556v1_genomic.fna.gz
GCF_011045155.1_ASM1104515v1_genomic.fna.gz
GCF_011046245.1_ASM1104624v1_genomic.fna.gz
GCF_011046895.1_ASM1104689v1_genomic.fna.gz
GCF_011128975.1_ASM1112897v1_genomic.fna.gz
GCF_011319365.1_ASM1131936v1_genomic.fna.gz
GCF_011604465.1_ASM1160446v1_genomic.fna.gz
GCF_011604485.1_ASM1160448v1_genomic.fna.gz
GCF_011604505.1_ASM1160450v1_genomic.fna.gz
GCF_011604525.1_ASM1160452v1_genomic.fna.gz
GCF_011604545.1_ASM1160454v1_genomic.fna.gz
GCF_011604565.1_ASM1160456v1_genomic.fna.gz
GCF_011761485.1_ASM1176148v1_genomic.fna.gz
GCF_012241395.1_ASM1224139v1_genomic.fna.gz
GCF_012241405.1_ASM1224140v1_genomic.fna.gz
GCF_012241485.1_ASM1224148v1_genomic.fna.gz
GCF_012272675.1_ASM1227267v1_genomic.fna.gz
GCF_012275345.1_ASM1227534v1_genomic.fna.gz
GCF_012275435.1_ASM1227543v1_genomic.fna.gz
GCF_012275595.1_ASM1227559v1_genomic.fna.gz
GCF_012275605.1_ASM1227560v1_genomic.fna.gz
GCF_012275615.1_ASM1227561v1_genomic.fna.gz
GCF_012275645.1_ASM1227564v1_genomic.fna.gz
GCF_012275665.1_ASM1227566v1_genomic.fna.gz
GCF_012275745.1_ASM1227574v1_genomic.fna.gz
GCF_012275785.1_ASM1227578v1_genomic.fna.gz
GCF_012275795.1_ASM1227579v1_genomic.fna.gz
GCF_012275835.1_ASM1227583v1_genomic.fna.gz
GCF_012275855.1_ASM1227585v1_genomic.fna.gz
GCF_012275875.1_ASM1227587v1_genomic.fna.gz
GCF_012275885.1_ASM1227588v1_genomic.fna.gz
GCF_012275915.1_ASM1227591v1_genomic.fna.gz
GCF_012275925.1_ASM1227592v1_genomic.fna.gz
GCF_012275945.1_ASM1227594v1_genomic.fna.gz
GCF_012275975.1_ASM1227597v1_genomic.fna.gz
GCF_012275995.1_ASM1227599v1_genomic.fna.gz
GCF_012276015.1_ASM1227601v1_genomic.fna.gz
GCF_012276025.1_ASM1227602v1_genomic.fna.gz
GCF_012276035.1_ASM1227603v1_genomic.fna.gz
GCF_012276075.1_ASM1227607v1_genomic.fna.gz
GCF_012276085.1_ASM1227608v1_genomic.fna.gz
GCF_012276115.1_ASM1227611v1_genomic.fna.gz
GCF_012276125.1_ASM1227612v1_genomic.fna.gz
GCF_012276155.1_ASM1227615v1_genomic.fna.gz
GCF_012276175.1_ASM1227617v1_genomic.fna.gz
GCF_012276195.1_ASM1227619v1_genomic.fna.gz
GCF_012276215.1_ASM1227621v1_genomic.fna.gz
GCF_012276225.1_ASM1227622v1_genomic.fna.gz
GCF_012276245.1_ASM1227624v1_genomic.fna.gz
GCF_012276275.1_ASM1227627v1_genomic.fna.gz
GCF_012276295.1_ASM1227629v1_genomic.fna.gz
GCF_012276315.1_ASM1227631v1_genomic.fna.gz
GCF_012276335.1_ASM1227633v1_genomic.fna.gz
GCF_012276355.1_ASM1227635v1_genomic.fna.gz
GCF_012276365.1_ASM1227636v1_genomic.fna.gz
GCF_012276375.1_ASM1227637v1_genomic.fna.gz
GCF_012276395.1_ASM1227639v1_genomic.fna.gz
GCF_012276435.1_ASM1227643v1_genomic.fna.gz
GCF_012276455.1_ASM1227645v1_genomic.fna.gz
GCF_012276475.1_ASM1227647v1_genomic.fna.gz
GCF_012276485.1_ASM1227648v1_genomic.fna.gz
GCF_012276505.1_ASM1227650v1_genomic.fna.gz
GCF_012276535.1_ASM1227653v1_genomic.fna.gz
GCF_012276545.1_ASM1227654v1_genomic.fna.gz
GCF_012276575.1_ASM1227657v1_genomic.fna.gz
GCF_012276585.1_ASM1227658v1_genomic.fna.gz
GCF_012276615.1_ASM1227661v1_genomic.fna.gz
GCF_012349085.1_ASM1234908v1_genomic.fna.gz
GCF_012349105.1_ASM1234910v1_genomic.fna.gz
GCF_012349115.1_ASM1234911v1_genomic.fna.gz
GCF_012641385.1_ASM1264138v1_genomic.fna.gz
GCF_012641395.1_ASM1264139v1_genomic.fna.gz
GCF_012641405.1_ASM1264140v1_genomic.fna.gz
GCF_012641435.1_ASM1264143v1_genomic.fna.gz
GCF_012927355.1_ASM1292735v1_genomic.fna.gz
GCF_012932725.1_ASM1293272v1_genomic.fna.gz
GCF_012932765.1_ASM1293276v1_genomic.fna.gz
GCF_013004155.1_ASM1300415v1_genomic.fna.gz
GCF_013004165.1_ASM1300416v1_genomic.fna.gz
GCF_013004175.1_ASM1300417v1_genomic.fna.gz
GCF_013004185.1_ASM1300418v1_genomic.fna.gz
GCF_013004195.1_ASM1300419v1_genomic.fna.gz
GCF_013004495.1_ASM1300449v1_genomic.fna.gz
GCF_013087515.1_ASM1308751v1_genomic.fna.gz
GCF_013087615.1_ASM1308761v1_genomic.fna.gz
GCF_013087625.1_ASM1308762v1_genomic.fna.gz
GCF_013267135.1_ASM1326713v1_genomic.fna.gz
GCF_013267155.1_ASM1326715v1_genomic.fna.gz
GCF_013285525.1_ASM1328552v1_genomic.fna.gz
GCF_013320535.1_ASM1332053v1_genomic.fna.gz
GCF_013320815.1_ASM1332081v1_genomic.fna.gz
GCF_013322055.1_ASM1332205v1_genomic.fna.gz
GCF_013378445.1_ASM1337844v1_genomic.fna.gz
GCF_013390595.1_ASM1339059v1_genomic.fna.gz
GCF_013391665.1_ASM1339166v1_genomic.fna.gz
GCF_013391685.1_ASM1339168v1_genomic.fna.gz
GCF_013391705.1_ASM1339170v1_genomic.fna.gz
GCF_013408035.1_ASM1340803v1_genomic.fna.gz
GCF_013416305.1_ASM1341630v1_genomic.fna.gz
GCF_013426935.1_ASM1342693v1_genomic.fna.gz
GCF_013426945.1_ASM1342694v1_genomic.fna.gz
GCF_900067135.1_IMG-taxon_2602042090_annotated_assembly_genomic.fna.gz
GCF_900094545.1_IMG-taxon_2617270742_annotated_assembly_genomic.fna.gz
GCF_900094555.1_IMG-taxon_2615840609_annotated_assembly_genomic.fna.gz
GCF_900094565.1_IMG-taxon_2615840626_annotated_assembly_genomic.fna.gz
GCF_900094585.1_IMG-taxon_2615840698_annotated_assembly_genomic.fna.gz
GCF_900094625.1_IMG-taxon_2615840624_annotated_assembly_genomic.fna.gz
GCF_900099775.1_IMG-taxon_2596583570_annotated_assembly_genomic.fna.gz
GCF_900101425.1_IMG-taxon_2599185210_annotated_assembly_genomic.fna.gz
GCF_900102105.1_IMG-taxon_2671180227_annotated_assembly_genomic.fna.gz
GCF_900108425.1_Tibet_genomic.fna.gz
GCF_900108545.1_IMG-taxon_2600254933_annotated_assembly_genomic.fna.gz
GCF_900109605.1_IMG-taxon_2617270885_annotated_assembly_genomic.fna.gz
GCF_900110205.1_IMG-taxon_2671180023_annotated_assembly_genomic.fna.gz
GCF_900111275.1_IMG-taxon_2599185156_annotated_assembly_genomic.fna.gz
GCF_900111905.1_IMG-taxon_2599185236_annotated_assembly_genomic.fna.gz
GCF_900155885.1_IMG-taxon_2708742416_annotated_assembly_genomic.fna.gz
GCF_900156005.1_IMG-taxon_2708742418_annotated_assembly_genomic.fna.gz
GCF_900156055.1_IMG-taxon_2708742397_annotated_assembly_genomic.fna.gz
GCF_900169785.1_ASM90016978v1_genomic.fna.gz
GCF_900176345.1_IMG-taxon_2716884867_annotated_assembly_genomic.fna.gz
GCF_900177415.1_IMG-taxon_2588254269_annotated_assembly_genomic.fna.gz
GCF_900215255.1_IMG-taxon_2617270923_annotated_assembly_genomic.fna.gz
GCF_900215635.1_IMG-taxon_2619618868_annotated_assembly_genomic.fna.gz
GCF_900220975.1_IMG-taxon_2740891857_annotated_assembly_genomic.fna.gz
GCF_900492185.1_T2.30D-1.1_genomic.fna.gz
GCF_900492205.1_T2.26MG-112.21_genomic.fna.gz
GCF_902153225.1_P007.1_genomic.fna.gz
GCF_902153235.1_JP120.1_genomic.fna.gz
GCF_902153245.1_JP121.1_genomic.fna.gz
GCF_902153285.1_B03_1.1_genomic.fna.gz
GCF_902498825.1_RHIZ404_assembly_genomic.fna.gz
GCF_902502775.1_D03_1.3_genomic.fna.gz
GCF_902502825.1_E03_1.2_genomic.fna.gz
GCF_902502895.1_F03_1.2_genomic.fna.gz
GCF_902706095.1_n18065v0.1_genomic.fna.gz
GCF_902706285.1_n18055v0.1_genomic.fna.gz

## Sheet: Table S3
Strain	# of bac120 genes	accession	notes
R._sp.__GCA_003248675.1	119	GCA_003248675.1	Agrobacterium pusense
R._sp._EC-SD404_	119	GCF_902498825.1
R._sp._Leaf386_Leaf386	119	GCF_001424085.1
R._sp._SEMIA_4085_SEMIA_4085	119	GCF_013004495.1
R._straminoryzae_SM12	118	GCF_007004135.1
R._tropici_NFR14	118	GCF_003001755.1	Bradyrhizobium
R._sp._NIBRBAC000502774_NIBRBAC000502774	115	GCF_001421985.1
R._sp._UBA1881_	115	GCA_002338015.1
R._leguminosarum_WSM1328	112	GCF_004054135.1	Rlc gsH - all the missing genes are on a single contig in the closely related WSM1325
R._phaseoli_Ch24-10	112	GCF_000268285.2
R._sp._63-7_	107	GCA_001896825.1
R._sp.__GCA_003527225.1	102	GCA_003527225.1
R._sp.__GCA_003501385.1	98	GCA_003501385.1
R._etli_8C-3_GCF_000172735.1	91	GCF_001908375.1
R._etli_GR56	90	GCF_000172755.1
R._phaseoli_Brasil_5_GCF_000172715.1	90	GCF_000172715.2
R._etli_IE4771	87	GCF_000172775.1
R._sp.__GCA_008015245.1	63	GCA_008015245.1
R._sp._JGI_0001005-K05_JGI_0001005-K05	41	GCF_000376185.1
R._sp._Bin_4_3	39	GCA_008015315.1
R._sp._JGI_0001019-L19_JGI_0001019-L19	37	GCF_000483365.1
R._sp._JGI_0001003-A11_JGI_0001003-A11	35	GCF_000483385.1
R._sp._JGI_0001005-H05_JGI_0001005-H05	29	GCF_000375385.1
R._sp._JGI_0001002-E20_JGI_0001002-E20	27	GCF_000485295.1
R._sp._JGI_001013-F22_JGI_001013-F22	27	GCF_000438905.1
R._sp._JGI_0001005-L20_JGI_0001005-L20	16	GCF_000484835.1
R._sp._JGI_001012-K08_JGI_001012-K08	13	GCF_000428185.1
R._sp._JGI_0001003-J22_JGI_0001003-J22	11	GCF_000483325.1
R._sp._JGI_0001014-F05_JGI_0001014-F05	7	GCF_000485315.1
R._sp._JGI_0001012-L22_JGI_0001012-L22	5	GCF_000485115.1
R._sp._JGI_0001011-C22_JGI_0001011-C22	4	GCF_000484815.1
R._sp._FML-4_FML-4	2	GCF_011319365.1
R._sp._JGI_0001002-C21_JGI_0001002-C21	1	GCF_000419905.1
R._sp._JGI_001014-O06_JGI_001014-O06	1	GCF_000464415.1
R._sp._JGI_0001003-M22_JGI_0001003-M22	0	GCA_000464375.1
R._sp._JGI_0001012-J08_JGI_0001012-J08	0	GCF_000485215.1
R._naphthalenivorans_T2.26MG-112.2_plasmid	0	GCA_900492195.1	just a plasmid

## Sheet: Table S4
Strain	NCBI taxon	current genus	accession
FKL33	R. sp.	g__FKL33	GCF_005222915.1	undescribed genus in the Rhizobiaceae
MIM27	R. arenae	Pararhizobium	GCF_001931685.1
Root1212	R. sp.	Pararhizobium	GCF_001424985.1
Root268	R. sp.	Pararhizobium	GCF_001428925.1
58	R. sp.	Pararhizobium	GCF_001885575.1
Root482	R. sp.	Pararhizobium	GCF_001426565.1
H152	R. giardinii	Pararhizobium	GCF_000379605.1
CF097	R. sp.	Pararhizobium	GCF_000744565.1
Leaf391	R. sp.	Pararhizobium	GCF_001424505.1
Leaf453	R. sp.	Pararhizobium	GCF_001425605.1
CF258	R. sp.	Pararhizobium	GCF_000744575.1
YR295	R. sp.	Pararhizobium	GCF_000745255.1
Root483D2	R. sp.	Pararhizobium	GCF_001426685.1
OK665	R. sp.	Pararhizobium	GCF_002211295.1
Root1204	R. sp.	Pararhizobium	GCF_001424965.1
Root1334	R. sp.	Pararhizobium	GCF_001426665.1
Root73	R. sp.	Pararhizobium	GCF_001429075.1
NFR03	R. sp.	Pararhizobium	GCF_001424065.1
9140	R. sp.	Pararhizobium	GCF_900067135.1
PP-WC-2G-219	R. sp.	Pararhizobium	GCF_006517835.1
PP-CC-3A-592	R. sp.	Pararhizobium	GCF_001675075.1
PP-F2F-G20b	R. sp.	Pararhizobium	GCF_900101425.1
PP-CC-2G-626	R. sp.	Pararhizobium	GCF_001664525.1
PP-CC-3G-465	R. sp.	Pararhizobium	GCF_003425685.1
PP-F2F-G36	R. sp.	Pararhizobium	GCF_900111275.1
PP-F2F-G38	R. sp.	Pararhizobium	GCF_900111905.1
PP-WC-1G-195	R. sp.	Pararhizobium	GCF_003269135.1
Leaf341	R. sp.	Pararhizobium	GCF_001424325.1
Leaf383	R. sp.	Pararhizobium	GCF_001425345.1
Leaf384	R. sp.	Pararhizobium	GCF_001424065.1
Leaf371	R. sp.	Pararhizobium	GCF_001424045.1
PP-F2F-G48	R. sp.	Pararhizobium	GCF_900108545.1
1.7048	R. oryzae	Pararhizobium	GCF_001938935.1
CGMCC1.7048	R. oryzae	Pararhizobium	GCF_900109605.1
MH17	R. rhizosphaerae	Pararhizobium	GCF_001938945.1
RD15	R. rhizosphaerae	Pararhizobium	GCF_002078095.1
RU20A	R. sp.	Mycoplana	GCF_900155885.1
DBTS2	R. sp.	Mycoplana	GCF_013378445.1
JC85	R. subbaraonis	Mycoplana	GCF_900220975.1
RM	R. sp.	Agrobacterium	GCF_013390595.1
Td3	R. sp.	Agrobacterium	GCF_005938205.1
Y9	R. sp.	Agrobacterium	GCF_002814035.1
UR51a	R. sp.	Agrobacterium	GCF_000931365.1
76	R. pusense	Agrobacterium	GCF_013285525.1
CNPSo3352	R. pusense	Agrobacterium	GCF_009649115.1
CFBP5496	R. pusense	Agrobacterium	GCF_005144405.1
FDAARGOS618	R. pusense	Agrobacterium	GCF_013267155.1
H41	R. sp.	Agrobacterium	GCF_000758445.1
S41	R. sp.	Agrobacterium	GCF_001691455.1
GHKF11	R. sp.	Agrobacterium	GCF_001644925.1
FDAARGOS619	R. pusense	Agrobacterium	GCF_013267135.1
FDAARGOS633	R. pusense	Agrobacterium	GCF_012272675.1
S2	R. pusense	Agrobacterium	GCF_003031575.1
CFBP5875	R. pusense	Agrobacterium	GCF_005221365.1
KCJK7997	R. pusense	Agrobacterium	GCF_003053405.1
LMB-1	R. sp.	Agrobacterium	GCF_000959075.1
LMG25623	R. pusense	Agrobacterium	GCF_900102105.1
NRCPB10	R. pusense	Agrobacterium	GCF_002008275.1
17-1009	R. pusense	Agrobacterium	GCF_013320535.1
CCGM11	R. pusense	Agrobacterium	GCF_001888225.1
CCGM10	R. pusense	Agrobacterium	GCF_001888145.1
P007	R. sp.	Agrobacterium	GCF_001664085.1
S1	R. pusense	Agrobacterium	GCF_003031555.1
IRBG74	R. sp.	Agrobacterium	GCF_000499645.1
UGM030330-04	R. sp.	Agrobacterium	GCF_003208455.1
SEMIA439	R. sp.	Agrobacterium	GCF_004766495.1
Root651	R. sp.	Agrobacterium	GCF_001427625.1
M15	R. oryzihabitans	Agrobacterium	GCF_010669145.1
39-7	R. nepotum	Agrobacterium	GCF_000949865.1
TBD182	R. sp.	Agrobacterium	GCF_001950375.1
Root491	R. sp.	Agrobacterium	GCF_001427205.1
SJZ105	R. sp.	Agrobacterium	GCF_007828365.1
AN5	R. sp.	Agrobacterium	GCF_900215255.1
AN6A	R. sp.	Agrobacterium	GCF_900215635.1
LZ-R	R. sp.	Agrobacterium	GCA_011319455.1
YIC5082	R. sp.	Agrobacterium	GCF_002894505.1
NFACC06-2	R. sp.	Agrobacterium	GCF_001425345.1
AU243	R. sp.	Agrobacterium	GCF_005298145.1
SEMIA4032	R. sp.	Agrobacterium	GCF_004766515.1
Root564	R. sp.	Agrobacterium	GCF_001427405.1
Leaf155	R. sp.	Agrobacterium	GCF_001424245.1
Leaf202	R. sp.	Agrobacterium	GCF_001421235.1
Leaf68	R. sp.	Agrobacterium	GCF_001421985.1
Leaf311	R. sp.	Agrobacterium	GCF_001423445.1
Di1472	R. skierniewicense	Agrobacterium	GCF_013320815.1
Leaf262	R. sp.	Agrobacterium	GCF_001422245.1
FY34	R. sp.	g__Rhizobium_A	GCF_005222845.1	https://gtdb.ecogenomic.org/searches?s=al&q=g__Rhizobium_A
DSM19479	R. pseudoryzae	g__Rhizobium_A	GCF_011046245.1	unnamed genus in the Rhizobiaceae
RU35A	R. sp.	g__Rhizobium_A	GCF_900156005.1
FKY42	R. sp.	g__Rhizobium_A	GCF_005222835.1
DSM29514	R. rhizoryzae	g__Rhizobium_A	GCF_011046895.1
Root149	R. sp.	g__Rhizobium_A	GCF_001427345.1
MGL06	R. marinum	Pseudorhizobium	GCF_000705355.1
JC140	R. endolithicum	Pseudorhizobium	GCF_902153245.1
Q54	R. sp.	Pseudorhizobium	GCF_002117485.1
NT-26	R. sp.	Pseudorhizobium	GCF_002531955.1
TCK	R. sp.	Pseudorhizobium	GCF_902502775.1
YW14	R. flavum	Pseudorhizobium	GCF_002000045.1
YW14	R. flavum	Pseudorhizobium	GCF_902502825.1
AB21	R. halotolerans	Pseudorhizobium	GCF_902153235.1
Khangiran2	R. sp.	Pseudorhizobium	GCF_902502895.1
LC145	R. sp.	Neorhizobium	GCF_001005825.1
LCM4573	R. sp.	Neorhizobium	GCF_001854865.1
B4P	R. oryzae	Neorhizobium	GCF_900177415.1
YS-1r	R. sp.	Neorhizobium	GCF_000757525.1
NAU-18	R. sp.	Neorhizobium	GCF_001424045.1
CF080	R. sp.	Neorhizobium	GCF_000282095.2
CCBAU05176	R. vignae	Neorhizobium	GCF_000732195.1
Leaf306	R. sp.	Neorhizobium	GCF_001423425.1
Leaf321	R. sp.	Neorhizobium	GCF_001423215.1
NFR12	R. sp.	Neorhizobium	GCF_001424505.1
PTYR-5	R. smilacinae	Neorhizobium	GCF_006335145.1
NFR07	R. sp.	Neorhizobium	GCF_001424085.1
SPY-1	R. deserti	Neorhizobium	GCF_004358025.1
24NR	R. sp.	Neorhizobium	GCF_004053875.1
ATCC700741	R. undicola	Allorhizobium	GCF_000621665.1
14971	R. taibaishanense	Allorhizobium	GCF_001938985.1
N19	R. oryziradicis	Allorhizobium	GCF_001939045.1
CC-HIH110	R. sp.	Allorhizobium	GCA_004801395.1
RU36D	R. sp.	Allorhizobium	GCF_900176345.1
18065	R. sp.	Allorhizobium	GCF_902706095.1
PDO1-076	R. sp.	Allorhizobium	GCF_001664545.1
ADMK78	R. sp.	Allorhizobium	GCF_005860795.1
ADMK78	R. sp.	Allorhizobium	GCF_005860795.2
shin9-1	R. ipomoeae	Allorhizobium	GCF_004912165.1
AAP43	R. sp.	Allorhizobium	GCF_001296045.1
SLBN-2-MSSRF-QS100	P. sp.	Allorhizobium	GCF_006716665.1
AG855	R. sp.	Allorhizobium	GCF_003610655.1
W44	R. wuzhouense	Allorhizobium	GCF_003205195.1
CL12	R. glycinendophyticum	Allorhizobium	GCF_006443685.1
Root1240	R. sp.	Allorhizobium	GCF_001425145.1
Root274	R. sp.	Allorhizobium	GCF_001429245.1
W3	R. rosettiformans	Allorhizobium	GCF_004912135.1
CRIBSB	R. sp.	Allorhizobium	GCF_009905715.1
TH135	R. sp.	Allorhizobium	GCF_002855515.1
7209-2	R. sp.	Allorhizobium	GCF_004912145.1
WL3	R. sp.	Allorhizobium	GCF_008000915.1
AAP116	R. sp.	Allorhizobium	GCF_001295785.1
RU33A	R. sp.	Allorhizobium	GCF_900156055.1
ACO-34A	R. sp.	Allorhizobium	GCF_002600635.1
CCBAU10050	R. daejeonense	Allorhizobium	GCF_011045155.1
KACC13094	R. daejeonense	Allorhizobium	GCF_010450895.1
S-51	R. sp.	Allorhizobium	GCF_012927355.1
NBRC107585	R. naphthalenivorans	Allorhizobium	GCF_007992095.1
T2.26MG-112.21	R. naphthalenivorans	Allorhizobium	GCF_900492205.1
T2.30D-1.1	R. selenitireducens	Allorhizobium	GCF_900492185.1
ATCC BAA-1503	R. selenitireducens	Allorhizobium	GCF_000518785.1
Kas-5-22	R. sp.	Allorhizobium	GCF_002933635.1
GCA_002796995.1	R. sp.	Allorhizobium	GCA_002796995.1	No longer in GenBank
NS-104	R. album	Rhizobium	GCF_003122325.1	A single strain that is an outlier to the genus Rhizobium

## Sheet: Table S5
Strain	NCBI taxon	genus	acccesion
SG570	R. sp.	Rhizobium	GCF_012275345.1
YR374	R. lusitanum	Rhizobium	GCF_000799975.1
SG741	R. sp.	Rhizobium	GCF_012275435.1
AF27-95	R. lusitanum	Rhizobium	GCF_013322055.1
OK494	R. sp.	Rhizobium	GCF_001664345.1
1158	R. lusitanum	Rhizobium	GCF_007829235.1
YR635	R. tropici	Rhizobium	GCF_000799925.1
P1-7	R. lusitanum	Rhizobium	GCF_900094565.1
AC27-96	R. sp.	Rhizobium	GCF_001692325.1
P44RR-XXIV	R. sp.	Rhizobium	GCF_001664325.1
P44RR-XXIV	R. sp.	Rhizobium	GCF_001664145.1
PRF81	R. freirei	Rhizobium	GCF_000359745.1
HAMBI2971	R. miluonense	Rhizobium	GCF_900094545.1
P38BS-XIX	R. sp.	Rhizobium	GCF_001675095.1
JHI1118	R. lusitanum	Rhizobium	GCF_010668395.1
SG526	R. sp.	Rhizobium	GCF_012932725.1
1234	R. miluonense	Rhizobium	GCF_007829155.1
IGFRI Rhizo-19	R. tropici	Rhizobium	GCF_003287875.1
SARCC-755	R. tropici	Rhizobium	GCF_008370325.1
CCGE531	R. sp.	Rhizobium	GCF_003627795.1
CCGE532	R. sp.	Rhizobium	GCF_003627775.1
P28RR-XV	R. sp.	Rhizobium	GCF_001664485.1
P40RR-XXII	R. sp.	Rhizobium	GCF_001664465.1
CCBAU57015	R. hainanense	Rhizobium	GCF_900094555.1
60-20	R. sp.	Rhizobium	GCA_001899545.1
WW1	R. sp.	Rhizobium	GCF_003610155.1
PTD1	R. tropici	Rhizobium	GCF_000799755.1
HAMBI2975	R. multihospitium	Rhizobium	GCF_900094585.1
11515TR	R. sp.	Rhizobium	GCF_002277895.1
YK2	R. sp.	Rhizobium	GCF_001729315.1
ERR922	R. sp.	Rhizobium	GCF_007827995.1
ERR942	R. sp.	Rhizobium	GCF_007828395.1
S-93	R. sp.	Rhizobium	GCF_009176305.1
ERR1071	R. sp.	Rhizobium	GCF_007828675.1
S-62	R. sp.	Rhizobium	GCF_009176325.1
JAB6	R. sp.	Rhizobium	GCF_003024605.1
SEMIA4088	R. sp.	Rhizobium	GCF_004766535.1
A12	R. tropici	Rhizobium	GCF_010815565.1
CIAT899	R. tropici	Rhizobium	GCF_000330885.1
BK315	R. sp.	Rhizobium	GCF_004341575.1
NFR17	R. sp.	Rhizobium	GCF_001425605.1
BK463	R. sp.	Rhizobium	GCF_011761485.1
ICMP5592	R. sp.	Rhizobium	GCF_009498525.1
AP16	R. sp.	Rhizobium	GCF_000281735.1
YR060	R. sp.	Rhizobium	GCF_000746335.1
NXC24	R. sp.	Rhizobium	GCF_005862215.1
SEMIA4064	R. sp.	Rhizobium	GCF_003025035.1
CPAO29.8	R. leucaenae	Rhizobium	GCF_001675175.1
USDA9039	R. leucaenae	Rhizobium	GCF_000426285.1
CCGE525	R. jaguaris	Rhizobium	GCF_003627755.1
BK333	R. sp.	Rhizobium	GCF_004362445.1
BK376	R. sp.	Rhizobium	GCF_004341625.1
CCBAU85046	R. tubonense	Rhizobium	GCF_003240585.1
1078	R. tumorigenes	Rhizobium	GCF_003240565.1
rho-6.2	R. sp.	Rhizobium	GCF_007000325.1
rho-1.1	R. sp.	Rhizobium	GCF_007000315.1
rho-13.1	R. sp.	Rhizobium	GCF_007000305.1
BK251	R. sp.	Rhizobium	GCF_004345245.1
AC44-96	R. sp.	Rhizobium	GCF_001692185.1
YR519	R. sp.	Rhizobium	GCF_000746385.1
GV031	R. sp.	Rhizobium	GCF_004345965.1
2MFCol3.1	R. sp.	Rhizobium	GCF_000377565.1
R22G	R. etli	Rhizobium	GCF_003259755.1
YR528	R. sp.	Rhizobium	GCF_000799775.1
OV483	R. leguminosarum	Rhizobium	GCF_000745655.1
Root1203	R. sp.	Rhizobium	GCF_001424945.1
18055	R. sp.	Rhizobium	GCF_902706285.1
Root1220	R. sp.	Rhizobium	GCF_001426265.1
BG7	R. grahamii	Rhizobium	GCF_009498215.1
Root708	R. sp.	Rhizobium	GCF_001429725.1
CF394	R. sp.	Rhizobium	GCF_000746265.1
CCGE502	R. grahamii	Rhizobium	GCF_000298315.2
CCGM3	R. grahamii	Rhizobium	GCF_003351175.1
42MFCr.1	R. sp.	Rhizobium	GCF_000377185.1
57MFTsu3.2	R. sp.	Rhizobium	GCF_012932765.1
BR10423	R. altiplani	Rhizobium	GCF_001542405.1
IBUN	R. sp.	Rhizobium	GCF_000510625.1
BK068	R. sp.	Rhizobium	GCF_004345405.1
CF122	R. sp.	Rhizobium	GCF_000282035.1
CF048	R. sp.	Rhizobium	GCF_000799845.1
OV201	R. sp.	Rhizobium	GCF_001664305.1
	R. tibeticum	Rhizobium	GCF_900108425.1
CGMCC1.7071	R. tibeticum	Rhizobium	GCF_900110205.1
LPU83	R. favelukesii	Rhizobium	GCF_000577275.1
LPU83	R. favelukesii	Rhizobium	GCF_000577275.2
OR191	R. favelukesii	Rhizobium	GCF_000419725.1
R693	R. sp.	Rhizobium	GCF_000745785.1
R711	R. sp.	Rhizobium	GCF_902153225.1
R72	R. sp.	Rhizobium	GCF_012641385.1
STM3625	R. mesoamericanum	Rhizobium	GCF_000312665.1
STM6155	R. mesoamericanum	Rhizobium	GCF_000427925.1
BK696	R. sp.	Rhizobium	GCF_004216975.1
P32RR-XVIII	R. sp.	Rhizobium	GCF_002245285.1
Hc14	R. sullae	Rhizobium	GCF_004342945.1
	R. sullae	Rhizobium	GCF_900169785.1
HCNT1	R. sullae	Rhizobium	GCF_002812325.1
WSM1592	R. sullae	Rhizobium	GCF_000427985.1
IE4868	R. azibense	Rhizobium	GCF_004342645.1
Gr42	R. azibense	Rhizobium	GCF_004342325.1
8C-3	R. etli	Rhizobium	GCF_000172735.1
CGMCC1.3401	R. loessense	Rhizobium	GCF_900099775.1
USDA1844	R. mongolense	Rhizobium	GCF_000419765.1
USDA1844	R. mongolense	Rhizobium	GCF_007827505.1
23C2	R. azibense	Rhizobium	GCF_004365425.1
R602	R. gallicum	Rhizobium	GCF_000816845.1
IE4872	R. gallicum	Rhizobium	GCF_001908615.1
CCBAU01603	R. yanglingense	Rhizobium	GCA_002200935.1
BK418	R. sp.	Rhizobium	GCF_004341105.1
CF142	R. sp.	Rhizobium	GCF_000281145.1
YR540	R. alamii	Rhizobium	GCF_000744505.1
YR584	R. alamii	Rhizobium	GCF_000799895.1
R635	R. sp.	Rhizobium	GCF_000745575.1
J15	R. sp.	Rhizobium	GCF_002531825.1
R339	R. sp.	Rhizobium	GCF_002944315.1
R634	R. sp.	Rhizobium	GCF_000746325.1
950	R. aegyptiacum	Rhizobium	GCF_001662105.1
HBR26	R. aethiopicum	Rhizobium	GCF_900094625.1
MHM7A	R. sp.	Rhizobium	GCF_005862215.1
1017	R. bangladeshense	Rhizobium	GCF_001662055.1
1024	R. bangladeshense	Rhizobium	GCF_001662125.1
L9	R. sp.	Rhizobium	GCF_002531885.1
NXC14	R. sp.	Rhizobium	GCF_002531805.1
CFN42	R. etli	Rhizobium	GCF_000092045.1
Mim1	R. etli	Rhizobium	GCF_000442435.1
NXC12	R. etli	Rhizobium	GCF_002119845.1
CNPSo668	R. esperanzae	Rhizobium	GCF_002204185.1
S9	R. sp.	Rhizobium	GCF_002531795.1
TAL182	R. sp.	Rhizobium	GCF_002117725.1
N1314	R. sp.	Rhizobium	GCF_001664305.1
N731	R. sp.	Rhizobium	GCF_001423425.1
N113	R. sp.	Rhizobium	GCF_001664345.1
N1341	R. sp.	Rhizobium	GCF_001664085.1
N741	R. sp.	Rhizobium	GCF_001423445.1
N871	R. sp.	Rhizobium	GCF_001423215.1
N561	R. esperanzae	Rhizobium	GCF_001664265.1
N6212	R. sp.	Rhizobium	GCF_001421235.1
N621	R. sp.	Rhizobium	GCF_001422245.1
BLR195	R. leguminosarum	Rhizobium	GCF_012276575.1
R630	R. phaseoli	Rhizobium	GCF_001664205.1
Y20	R. phaseoli	Rhizobium	GCF_002531595.1
ATCC14482	R. phaseoli	Rhizobium	GCF_003985125.1
Brasil5	R. phaseoli	Rhizobium	GCF_000172715.1
CNPAF512	R. etli	Rhizobium	GCF_000194195.1
N261	R. phaseoli	Rhizobium	GCF_001664105.1
R723	R. phaseoli	Rhizobium	GCF_001664225.1
CCGM1	R. leguminosarum	Rhizobium	GCF_000705615.1
CCGM2	R. phaseoli	Rhizobium	GCF_003150695.1
N831	R. phaseoli	Rhizobium	GCF_001664125.1
N931	R. phaseoli	Rhizobium	GCF_001664285.1
N161	R. phaseoli	Rhizobium	GCF_001664165.1
Ch24-10	R. phaseoli	Rhizobium	GCF_000268285.1
CCGM8	R. phaseoli	Rhizobium	GCF_003351185.1
CCGM9	R. phaseoli	Rhizobium	GCF_003351165.1
N841	R. phaseoli	Rhizobium	GCF_001664425.1
BUS002	R. sp.	Rhizobium	GCF_012241405.1
BUS003	R. sp.	Rhizobium	GCF_012241395.1
N671	R. phaseoli	Rhizobium	GCF_001664365.1
N771	R. phaseoli	Rhizobium	GCF_001664405.1
R611	R. phaseoli	Rhizobium	GCF_001664445.1
R650	R. phaseoli	Rhizobium	GCF_001664385.1
R620	R. phaseoli	Rhizobium	GCF_001664245.1
NC1	R. phaseoli	Rhizobium	GCF_002531715.1
BGM003	R. sp.	Rhizobium	GCF_012241485.1
R744	R. phaseoli	Rhizobium	GCF_001664185.1
CIAT652	R. etli	Rhizobium	GCF_000020265.1
Y18	R. phaseoli	Rhizobium	GCF_002355115.1
JJW1	R. sophoriradicis	Rhizobium	GCF_002406505.1
CCBAU03386	R. sophorae	Rhizobium	GCF_002008155.1
CCBAU03470	R. sophoriradicis	Rhizobium	GCF_003939025.1
Kim5	R. sp.	Rhizobium	GCF_000172695.2
L101	R. sophoriradicis	Rhizobium	GCF_002406495.1
H4	R. sp.	Rhizobium	GCF_002531775.1
IE4803	R. etli	Rhizobium	GCF_000816125.1
IE4771	R. etli	Rhizobium	GCF_000172775.1
IE4771	R. sp.	Rhizobium	GCF_000698845.1
1002	R. bangladeshense	Rhizobium	GCF_001662075.1
H4	R. sp.	Rhizobium	GCF_003013335.1
M10	R. sp.	Rhizobium	GCF_002531955.1
M1	R. sp.	Rhizobium	GCF_002531805.1
Pop5	R. sp.	Rhizobium	GCF_000967425.1
CCBAU33202	R. fabae	Rhizobium	GCF_003985135.1
CZP3G4	R. pisi	Rhizobium	GCF_004330745.1
DSM30132	R. pisi	Rhizobium	GCF_003938655.1
CCBAU65647	R. vallis	Rhizobium	GCF_003985155.1
CIAT894	R. sp.	Rhizobium	GCF_000172795.2
C16	R. sp.	Rhizobium	GCF_003985205.1
C5	R. sp.	Rhizobium	GCF_002531935.1
WSM2297	R. leguminosarum	Rhizobium	GCF_000271845.1
CB782	R. leguminosarum	Rhizobium	GCF_000520875.1
WSM2012	R. leguminosarum	Rhizobium	GCF_000271825.1
CB763	R. hidalgonense	Rhizobium	GCF_004028085.1
FH14	R. hidalgonense	Rhizobium	GCF_002531855.1
FH14	R. hidalgonense	Rhizobium	GCF_002914525.1
JKLM19E	R. sp.	Rhizobium	GCF_005862185.1
JKLM19E	R. sp.	Rhizobium	GCF_005862185.2
SEF4G12	R. leguminosarum	Rhizobium	GCF_004329985.1
L18	R. sp.	Rhizobium	GCF_002531905.1
WSM597	R. leguminosarum	Rhizobium	GCF_000271785.1
FH23	R. acidisoli	Rhizobium	GCF_001297245.1
FH23	R. acidisoli	Rhizobium	GCF_002531755.1
FH23	R. acidisoli	Rhizobium	GCF_002531755.2
WSM2304	R. leguminosarum	Rhizobium	GCF_000021345.1
SEMIA4052	R. leguminosarum	Rhizobium	GCF_013408035.1
CNPSO671	R. ecuadorense	Rhizobium	GCF_001187535.1
RMa-01	R. sp.	Rhizobium	GCF_004016565.1
RSm-3	R. sp.	Rhizobium	GCF_001854685.1
CCGM4	R. leguminosarum	Rhizobium	GCF_003400125.1
CCGM5	R. leguminosarum	Rhizobium	GCF_003400085.1
CCGM6	R. leguminosarum	Rhizobium	GCF_003400105.1
N122	R. sp.	Rhizobium	GCF_002211295.1
N541	R. sp.	Rhizobium	GCF_001424245.1
N941	R. sp.	Rhizobium	GCF_001424325.1
N324	R. sp.	Rhizobium	GCF_001664485.1
N4311	R. sp.	Rhizobium	GCA_011319455.1
JHI366	R. phaseoli	Rhizobium	GCF_010668805.1
CCGE510	R. sp.	Rhizobium	GCF_000292525.1
L43	R. sp.	Rhizobium	GCF_002531725.1

## Sheet: Table S6
R._gallicum_R602sp_GCF_000373025.1.fna
R._indigoferae_CCBAU_71042_GCA_013087605.1.fna
R._leguminosarum_248_GCF_000385155.1.fna
R._leguminosarum_A1_GCF_011128975.1.fna
R._leguminosarum_CC275e_GCF_000769405.1.fna
R._leguminosarum_DSM_106839_GCF_014202125.1.fna
R._leguminosarum_TA1_GCF_000430465.1.fna
R._leguminosarum_TA1_GCF_000430465.2.fna
R._leguminosarum_UPM1134_GCF_012275745.1.fna
R._leguminosarum_USDA_2370_GCF_003058385.1.fna
R._ruizarguesonis_UPM1135_GCA_012412905.1.fna
R._sp._JKLM12A2_JKLM12A2_GCF_005862305.1.fna
R._sp._JKLM13E_JKLM13E_GCF_005860925.1.fna

## Sheet: Table S7
Your strain 'Rhizobium sophorae' (GCF_013087515.1) belongs to species Rhizobium sophorae.
Your strain 'Rhizobium laguerreae' (GCF_002008165.1) belongs to species Rhizobium laguerreae.
Your strain 'Rhizobium leguminosarum bv. viciae USDA 2370' (GCF_002008365.1) belongs to species Rhizobium leguminosarum.
Your strain 'Rhizobium anhuiense' (GCF_003985145.1) belongs to species Rhizobium anhuiense.
Your strain 'Rhizobium indicum' (GCF_005862305.2) belongs to species Rhizobium indicum. Note: (This is not a validly published name!)
Your strain 'Rhizobium ruizarguesonis' (GCF_012349115.1) belongs to species Rhizobium ruizarguesonis.
Potential new species detected: your strain 'Rhizobium leguminosarum bv. viciae 3841' (GCF_000009265.1) does not belong to any species found in TYGS database.
Potential new species detected: your strain 'Rhizobium leguminosarum bv. trifolii WSM1325' (GCF_000023185.1) does not belong to any species found in TYGS database.
Potential new species detected: your strain 'Rhizobium leguminosarum bv. viciae WSM1455' (GCF_000271805.1) does not belong to any species found in TYGS database.
Potential new species detected: your strain 'Rhizobium leguminosarum bv. trifolii SRDI565' (GCF_000371905.1) does not belong to any species found in TYGS database.
Potential new species detected: your strain 'Rhizobium leguminosarum bv. viciae TOM' (GCF_000372205.1) does not belong to any species found in TYGS database.
Potential new species detected: your strain 'Rhizobium leguminosarum bv. phaseoli FA23' (GCF_000419705.1) does not belong to any species found in TYGS database.
Potential new species detected: your strain 'Rhizobium leguminosarum bv. trifolii' (GCF_000769405.2) does not belong to any species found in TYGS database.
Potential new species detected: your strain 'Rhizobium leguminosarum' (GCF_001652265.1) does not belong to any species found in TYGS database.
Potential new species detected: your strain 'Rhizobium leguminosarum' (GCF_001679785.1) does not belong to any species found in TYGS database.
Potential new species detected: your strain 'Rhizobium leguminosarum' (GCF_004306515.1) does not belong to any species found in TYGS database.
Potential new species detected: your strain 'Rhizobium leguminosarum bv. viciae 248' (GCF_010365265.1) does not belong to any species found in TYGS database.
Potential new species detected: your strain 'Rhizobium laguerreae' (GCF_010668165.1) does not belong to any species found in TYGS database.
Potential new species detected: your strain 'Rhizobium sp. WYCCWR 11290' (GCF_013426945.1) does not belong to any species found in TYGS database.
Type Strain Genome Server
Query strain	Subject strain	dDDH (d0, in %)	C.I. (d0, in %)	dDDH (d4, in %)	C.I. (d4, in %)	dDDH (d6, in %)	C.I. (d6, in %)	G+C content difference (in %)
'Rhizobium leguminosarum bv. viciae USDA 2370' (GCF 002008365.1)	Rhizobium leguminosarum USDA 2370	100	[100.0 - 100.0]	100	[100.0 - 100.0]	100	[100.0 - 100.0]	0
'Rhizobium sophorae' (GCF 013087515.1)	Rhizobium sophorae CCBAU 03386	100	[100.0 - 100.0]	100	[100.0 - 100.0]	100	[100.0 - 100.0]	0.01
'Rhizobium anhuiense' (GCF 003985145.1)	Rhizobium anhuiense CGMCC 1.12621	100	[100.0 - 100.0]	100	[100.0 - 100.0]	100	[100.0 - 100.0]	0.01
'Rhizobium anhuiense' (GCF 003985145.1)	Rhizobium anhuiense CCBAU 23252	100	[100.0 - 100.0]	100	[100.0 - 100.0]	100	[100.0 - 100.0]	0.01
'Rhizobium ruizarguesonis' (GCF 012349115.1)	Rhizobium ruizarguesonis UPM1133T	100	[100.0 - 100.0]	100	[100.0 - 100.0]	100	[100.0 - 100.0]	0.01
'Rhizobium laguerreae' (GCF 002008165.1)	Rhizobium laguerreae FB206	100	[100.0 - 100.0]	100	[100.0 - 100.0]	100	[100.0 - 100.0]	0
'Rhizobium indicum' (GCF 005862305.2)	Rhizobium indicum MCC 3961T	100	[100.0 - 100.0]	100	[100.0 - 100.0]	100	[100.0 - 100.0]	0
'Rhizobium leguminosarum bv. viciae USDA 2370' (GCF 002008365.1)	Rhizobium leguminosarum DSM 106839	100	[99.9 - 100.0]	99.9	[99.9 - 100.0]	100	[100.0 - 100.0]	0
'Rhizobium leguminosarum bv. viciae USDA 2370' (GCF 002008365.1)	Rhizobium trifolii DSM 30141	74.1	[70.1 - 77.7]	80.4	[77.5 - 83.0]	77.9	[74.5 - 81.0]	0.03
'Rhizobium leguminosarum bv. viciae 3841' (GCF 000009265.1)	'Rhizobium leguminosarum bv. viciae WSM1455' (GCF 000271805.1)	76	[72.0 - 79.6]	66.1	[63.2 - 69.0]	76.8	[73.3 - 79.9]	0.1
'Rhizobium leguminosarum bv. viciae TOM' (GCF 000372205.1)	'Rhizobium laguerreae' (GCF 010668165.1)	75.4	[71.4 - 79.0]	64.5	[61.5 - 67.3]	75.9	[72.4 - 79.1]	0.06
'Rhizobium leguminosarum bv. viciae 3841' (GCF 000009265.1)	'Rhizobium leguminosarum bv. phaseoli FA23' (GCF 000419705.1)	71.3	[67.3 - 74.9]	64.2	[61.3 - 67.0]	72.2	[68.7 - 75.4]	0.01
'Rhizobium leguminosarum bv. viciae WSM1455' (GCF 000271805.1)	'Rhizobium leguminosarum bv. phaseoli FA23' (GCF 000419705.1)	68.7	[64.8 - 72.4]	63.8	[60.9 - 66.7]	69.9	[66.5 - 73.2]	0.11
'Rhizobium leguminosarum' (GCF 001679785.1)	'Rhizobium laguerreae' (GCF 010668165.1)	64.2	[60.4 - 67.8]	63.4	[60.4 - 66.2]	65.8	[62.4 - 69.0]	0.24
'Rhizobium sp. WYCCWR 11290' (GCF 013426945.1)	Rhizobium sophorae CCBAU 03386	69.7	[65.8 - 73.4]	63.3	[60.4 - 66.1]	70.7	[67.2 - 73.9]	0.04
'Rhizobium leguminosarum bv. viciae 248' (GCF 010365265.1)	Rhizobium laguerreae FB206	71.8	[67.9 - 75.5]	63.3	[60.4 - 66.1]	72.5	[69.0 - 75.7]	0.16
'Rhizobium sophorae' (GCF 013087515.1)	'Rhizobium sp. WYCCWR 11290' (GCF 013426945.1)	69.7	[65.8 - 73.4]	63.3	[60.4 - 66.1]	70.7	[67.2 - 73.9]	0.04
'Rhizobium laguerreae' (GCF 002008165.1)	'Rhizobium leguminosarum bv. viciae 248' (GCF 010365265.1)	71.8	[67.9 - 75.5]	63.3	[60.4 - 66.1]	72.5	[69.0 - 75.7]	0.16
'Rhizobium leguminosarum bv. viciae TOM' (GCF 000372205.1)	'Rhizobium leguminosarum' (GCF 001679785.1)	63.4	[59.7 - 67.0]	63.1	[60.2 - 65.9]	65	[61.7 - 68.2]	0.3
'Rhizobium laguerreae' (GCF 002008165.1)	'Rhizobium laguerreae' (GCF 010668165.1)	71.7	[67.8 - 75.4]	62.8	[59.9 - 65.6]	72.3	[68.9 - 75.5]	0
'Rhizobium laguerreae' (GCF 010668165.1)	Rhizobium laguerreae FB206	71.7	[67.8 - 75.4]	62.8	[59.9 - 65.6]	72.3	[68.9 - 75.5]	0
'Rhizobium leguminosarum bv. viciae 248' (GCF 010365265.1)	'Rhizobium laguerreae' (GCF 010668165.1)	78.7	[74.7 - 82.2]	62.7	[59.8 - 65.5]	78.2	[74.8 - 81.3]	0.16
'Rhizobium leguminosarum bv. viciae TOM' (GCF 000372205.1)	Rhizobium laguerreae FB206	74.8	[70.9 - 78.4]	62.2	[59.3 - 65.0]	74.8	[71.4 - 78.0]	0.06
'Rhizobium leguminosarum bv. viciae TOM' (GCF 000372205.1)	'Rhizobium laguerreae' (GCF 002008165.1)	74.8	[70.9 - 78.4]	62.2	[59.3 - 65.0]	74.8	[71.4 - 78.0]	0.06
'Rhizobium leguminosarum' (GCF 001679785.1)	'Rhizobium laguerreae' (GCF 002008165.1)	60.3	[56.6 - 63.8]	60.5	[57.6 - 63.3]	61.6	[58.3 - 64.8]	0.24
'Rhizobium leguminosarum' (GCF 001679785.1)	Rhizobium laguerreae FB206	60.3	[56.6 - 63.8]	60.5	[57.6 - 63.3]	61.6	[58.3 - 64.8]	0.24
'Rhizobium leguminosarum' (GCF 004306515.1)	Rhizobium trifolii DSM 30141	70.3	[66.4 - 74.0]	60.3	[57.5 - 63.1]	70.5	[67.0 - 73.7]	0.22
'Rhizobium leguminosarum bv. phaseoli FA23' (GCF 000419705.1)	Rhizobium indicum MCC 3961T	74.3	[70.3 - 77.9]	60.2	[57.3 - 62.9]	73.9	[70.4 - 77.1]	0.07
'Rhizobium leguminosarum bv. phaseoli FA23' (GCF 000419705.1)	'Rhizobium indicum' (GCF 005862305.2)	74.3	[70.3 - 77.9]	60.2	[57.3 - 62.9]	73.9	[70.4 - 77.1]	0.07
'Rhizobium leguminosarum' (GCF 004306515.1)	Rhizobium leguminosarum USDA 2370	68	[64.2 - 71.7]	60.1	[57.2 - 62.8]	68.5	[65.0 - 71.7]	0.19
'Rhizobium leguminosarum' (GCF 004306515.1)	Rhizobium leguminosarum DSM 106839	67.7	[63.8 - 71.3]	60.1	[57.2 - 62.9]	68.1	[64.7 - 71.4]	0.19
'Rhizobium leguminosarum bv. viciae USDA 2370' (GCF 002008365.1)	'Rhizobium leguminosarum' (GCF 004306515.1)	68	[64.2 - 71.7]	60.1	[57.2 - 62.8]	68.5	[65.0 - 71.7]	0.19
'Rhizobium leguminosarum' (GCF 001652265.1)	'Rhizobium ruizarguesonis' (GCF 012349115.1)	63.9	[60.1 - 67.5]	59.7	[56.8 - 62.4]	64.7	[61.3 - 67.9]	0.13
'Rhizobium leguminosarum' (GCF 001652265.1)	Rhizobium ruizarguesonis UPM1133T	63.9	[60.1 - 67.5]	59.7	[56.8 - 62.4]	64.7	[61.3 - 67.9]	0.13
'Rhizobium leguminosarum bv. viciae TOM' (GCF 000372205.1)	'Rhizobium leguminosarum bv. viciae 248' (GCF 010365265.1)	70.2	[66.3 - 73.8]	59.6	[56.7 - 62.3]	70.2	[66.7 - 73.4]	0.11
'Rhizobium leguminosarum bv. phaseoli FA23' (GCF 000419705.1)	'Rhizobium laguerreae' (GCF 010668165.1)	66.9	[63.1 - 70.6]	59.5	[56.7 - 62.3]	67.4	[64.0 - 70.6]	0.07
'Rhizobium leguminosarum' (GCF 001679785.1)	'Rhizobium leguminosarum bv. viciae 248' (GCF 010365265.1)	59	[55.4 - 62.5]	59.3	[56.5 - 62.1]	60.2	[57.0 - 63.4]	0.41
'Rhizobium leguminosarum bv. trifolii SRDI565' (GCF 000371905.1)	'Rhizobium leguminosarum' (GCF 001652265.1)	60.4	[56.7 - 63.9]	58.8	[56.0 - 61.6]	61.4	[58.1 - 64.6]	0.05
'Rhizobium leguminosarum bv. trifolii WSM1325' (GCF 000023185.1)	'Rhizobium leguminosarum bv. trifolii' (GCF 000769405.2)	69.6	[65.7 - 73.3]	58.5	[55.7 - 61.3]	69.5	[66.0 - 72.7]	0.11
'Rhizobium leguminosarum bv. viciae TOM' (GCF 000372205.1)	'Rhizobium leguminosarum bv. phaseoli FA23' (GCF 000419705.1)	66.9	[63.0 - 70.5]	58.4	[55.6 - 61.2]	67	[63.6 - 70.3]	0.01
'Rhizobium leguminosarum bv. viciae WSM1455' (GCF 000271805.1)	Rhizobium indicum MCC 3961T	69.3	[65.4 - 73.0]	58.4	[55.6 - 61.1]	69.2	[65.7 - 72.4]	0.18
'Rhizobium leguminosarum bv. viciae WSM1455' (GCF 000271805.1)	'Rhizobium indicum' (GCF 005862305.2)	69.3	[65.4 - 73.0]	58.4	[55.6 - 61.1]	69.2	[65.7 - 72.4]	0.18
'Rhizobium leguminosarum bv. phaseoli FA23' (GCF 000419705.1)	'Rhizobium leguminosarum' (GCF 001679785.1)	56.3	[52.8 - 59.8]	58.4	[55.6 - 61.1]	57.6	[54.4 - 60.8]	0.31
'Rhizobium leguminosarum bv. viciae 3841' (GCF 000009265.1)	'Rhizobium indicum' (GCF 005862305.2)	70	[66.0 - 73.6]	58.2	[55.4 - 60.9]	69.7	[66.2 - 72.9]	0.09
'Rhizobium leguminosarum bv. viciae 3841' (GCF 000009265.1)	'Rhizobium laguerreae' (GCF 010668165.1)	68.1	[64.2 - 71.8]	58.2	[55.4 - 61.0]	68.1	[64.6 - 71.3]	0.08
'Rhizobium leguminosarum bv. viciae 3841' (GCF 000009265.1)	Rhizobium indicum MCC 3961T	70	[66.0 - 73.6]	58.2	[55.4 - 60.9]	69.7	[66.2 - 72.9]	0.09
'Rhizobium leguminosarum bv. phaseoli FA23' (GCF 000419705.1)	'Rhizobium leguminosarum bv. viciae 248' (GCF 010365265.1)	65.2	[61.4 - 68.9]	58.1	[55.3 - 60.9]	65.5	[62.2 - 68.8]	0.1
'Rhizobium leguminosarum bv. trifolii WSM1325' (GCF 000023185.1)	'Rhizobium leguminosarum bv. phaseoli FA23' (GCF 000419705.1)	64.5	[60.7 - 68.1]	57.9	[55.1 - 60.7]	64.8	[61.5 - 68.1]	0.08
'Rhizobium leguminosarum bv. viciae WSM1455' (GCF 000271805.1)	'Rhizobium laguerreae' (GCF 010668165.1)	66.6	[62.8 - 70.3]	57.8	[55.0 - 60.6]	66.7	[63.3 - 69.9]	0.18
'Rhizobium leguminosarum bv. viciae 3841' (GCF 000009265.1)	'Rhizobium leguminosarum bv. viciae 248' (GCF 010365265.1)	65.5	[61.7 - 69.1]	57.8	[55.0 - 60.5]	65.7	[62.3 - 68.9]	0.08
'Rhizobium leguminosarum bv. viciae WSM1455' (GCF 000271805.1)	'Rhizobium leguminosarum bv. viciae 248' (GCF 010365265.1)	68.4	[64.5 - 72.0]	57.5	[54.7 - 60.2]	68.1	[64.7 - 71.3]	0.02
'Rhizobium leguminosarum bv. viciae 3841' (GCF 000009265.1)	'Rhizobium leguminosarum bv. viciae TOM' (GCF 000372205.1)	64.7	[60.9 - 68.3]	57.3	[54.5 - 60.0]	64.9	[61.5 - 68.1]	0.03
'Rhizobium laguerreae' (GCF 010668165.1)	Rhizobium indicum MCC 3961T	68.6	[64.7 - 72.2]	57.2	[54.4 - 59.9]	68.2	[64.8 - 71.4]	0
'Rhizobium indicum' (GCF 005862305.2)	'Rhizobium laguerreae' (GCF 010668165.1)	68.6	[64.7 - 72.2]	57.2	[54.4 - 59.9]	68.2	[64.8 - 71.4]	0
'Rhizobium leguminosarum bv. viciae WSM1455' (GCF 000271805.1)	'Rhizobium leguminosarum bv. viciae TOM' (GCF 000372205.1)	65.7	[61.8 - 69.3]	57.2	[54.4 - 59.9]	65.7	[62.3 - 68.9]	0.13
'Rhizobium leguminosarum bv. phaseoli FA23' (GCF 000419705.1)	'Rhizobium laguerreae' (GCF 002008165.1)	64.3	[60.5 - 67.9]	57.2	[54.5 - 60.0]	64.5	[61.2 - 67.7]	0.07
'Rhizobium leguminosarum bv. phaseoli FA23' (GCF 000419705.1)	Rhizobium laguerreae FB206	64.3	[60.5 - 67.9]	57.2	[54.5 - 60.0]	64.5	[61.2 - 67.7]	0.07
'Rhizobium leguminosarum bv. viciae 3841' (GCF 000009265.1)	'Rhizobium laguerreae' (GCF 002008165.1)	66.3	[62.4 - 69.9]	57.1	[54.3 - 59.8]	66.2	[62.8 - 69.4]	0.08
'Rhizobium leguminosarum bv. viciae 3841' (GCF 000009265.1)	Rhizobium laguerreae FB206	66.3	[62.4 - 69.9]	57.1	[54.3 - 59.8]	66.2	[62.8 - 69.4]	0.08
'Rhizobium leguminosarum bv. viciae WSM1455' (GCF 000271805.1)	'Rhizobium leguminosarum' (GCF 001679785.1)	54.7	[51.2 - 58.2]	57.1	[54.3 - 59.8]	55.8	[52.7 - 59.0]	0.42
'Rhizobium leguminosarum bv. viciae 3841' (GCF 000009265.1)	'Rhizobium leguminosarum' (GCF 001679785.1)	58.3	[54.7 - 61.8]	56.9	[54.2 - 59.7]	59.1	[55.8 - 62.2]	0.33
'Rhizobium leguminosarum bv. viciae WSM1455' (GCF 000271805.1)	'Rhizobium laguerreae' (GCF 002008165.1)	68	[64.1 - 71.7]	56.2	[53.5 - 58.9]	67.5	[64.1 - 70.7]	0.18
'Rhizobium leguminosarum bv. viciae WSM1455' (GCF 000271805.1)	Rhizobium laguerreae FB206	68	[64.1 - 71.7]	56.2	[53.5 - 58.9]	67.5	[64.1 - 70.7]	0.18
'Rhizobium leguminosarum' (GCF 001679785.1)	'Rhizobium indicum' (GCF 005862305.2)	57.4	[53.8 - 60.9]	56.2	[53.4 - 58.9]	58.1	[54.9 - 61.2]	0.24
'Rhizobium leguminosarum' (GCF 001679785.1)	Rhizobium indicum MCC 3961T	57.4	[53.8 - 60.9]	56.2	[53.4 - 58.9]	58.1	[54.9 - 61.2]	0.24
'Rhizobium leguminosarum bv. viciae TOM' (GCF 000372205.1)	'Rhizobium indicum' (GCF 005862305.2)	68.1	[64.2 - 71.7]	56.1	[53.3 - 58.8]	67.5	[64.1 - 70.7]	0.06
'Rhizobium leguminosarum bv. viciae TOM' (GCF 000372205.1)	Rhizobium indicum MCC 3961T	68.1	[64.2 - 71.7]	56.1	[53.3 - 58.8]	67.5	[64.1 - 70.7]	0.06
'Rhizobium leguminosarum bv. viciae 248' (GCF 010365265.1)	Rhizobium indicum MCC 3961T	66.4	[62.5 - 70.0]	55.8	[53.1 - 58.5]	65.9	[62.6 - 69.2]	0.17
'Rhizobium indicum' (GCF 005862305.2)	'Rhizobium leguminosarum bv. viciae 248' (GCF 010365265.1)	66.4	[62.5 - 70.0]	55.8	[53.1 - 58.5]	65.9	[62.6 - 69.2]	0.17
'Rhizobium leguminosarum bv. trifolii WSM1325' (GCF 000023185.1)	Rhizobium indicum MCC 3961T	65.7	[61.8 - 69.3]	55.7	[53.0 - 58.4]	65.3	[61.9 - 68.5]	0.01
'Rhizobium leguminosarum bv. trifolii WSM1325' (GCF 000023185.1)	'Rhizobium indicum' (GCF 005862305.2)	65.7	[61.8 - 69.3]	55.7	[53.0 - 58.4]	65.3	[61.9 - 68.5]	0.01
'Rhizobium leguminosarum bv. viciae 3841' (GCF 000009265.1)	'Rhizobium leguminosarum bv. trifolii WSM1325' (GCF 000023185.1)	64.7	[60.9 - 68.3]	55.6	[52.9 - 58.3]	64.4	[61.1 - 67.7]	0.09
'Rhizobium indicum' (GCF 005862305.2)	'Rhizobium sp. WYCCWR 11290' (GCF 013426945.1)	71.7	[67.7 - 75.3]	55.5	[52.8 - 58.3]	70.4	[66.9 - 73.6]	0.1
'Rhizobium leguminosarum bv. trifolii WSM1325' (GCF 000023185.1)	'Rhizobium leguminosarum bv. viciae WSM1455' (GCF 000271805.1)	69.7	[65.8 - 73.4]	55.5	[52.7 - 58.2]	68.7	[65.3 - 72.0]	0.19
'Rhizobium sp. WYCCWR 11290' (GCF 013426945.1)	Rhizobium indicum MCC 3961T	71.7	[67.7 - 75.3]	55.5	[52.8 - 58.3]	70.4	[66.9 - 73.6]	0.1
'Rhizobium leguminosarum bv. phaseoli FA23' (GCF 000419705.1)	'Rhizobium leguminosarum bv. trifolii' (GCF 000769405.2)	68.9	[65.0 - 72.6]	55.1	[52.4 - 57.8]	68	[64.6 - 71.2]	0.03
'Rhizobium leguminosarum' (GCF 004306515.1)	'Rhizobium ruizarguesonis' (GCF 012349115.1)	73.3	[69.3 - 76.9]	54.9	[52.2 - 57.6]	71.6	[68.2 - 74.8]	0.02
'Rhizobium leguminosarum' (GCF 004306515.1)	Rhizobium ruizarguesonis UPM1133T	73.3	[69.3 - 76.9]	54.9	[52.2 - 57.6]	71.6	[68.2 - 74.8]	0.01
'Rhizobium indicum' (GCF 005862305.2)	Rhizobium laguerreae FB206	66.1	[62.3 - 69.8]	54.8	[52.1 - 57.5]	65.5	[62.1 - 68.7]	0
'Rhizobium laguerreae' (GCF 002008165.1)	'Rhizobium indicum' (GCF 005862305.2)	66.1	[62.3 - 69.8]	54.8	[52.1 - 57.5]	65.5	[62.1 - 68.7]	0
'Rhizobium leguminosarum bv. trifolii' (GCF 000769405.2)	'Rhizobium leguminosarum' (GCF 004306515.1)	68.6	[64.7 - 72.2]	54.8	[52.0 - 57.5]	67.6	[64.2 - 70.8]	0.1
'Rhizobium laguerreae' (GCF 002008165.1)	Rhizobium indicum MCC 3961T	66.1	[62.3 - 69.8]	54.8	[52.1 - 57.5]	65.5	[62.1 - 68.7]	0
'Rhizobium leguminosarum bv. trifolii SRDI565' (GCF 000371905.1)	Rhizobium ruizarguesonis UPM1133T	64	[60.2 - 67.6]	54.7	[52.0 - 57.4]	63.6	[60.3 - 66.8]	0.08
'Rhizobium indicum' (GCF 005862305.2)	Rhizobium sophorae CCBAU 03386	67	[63.1 - 70.6]	54.7	[52.0 - 57.4]	66.2	[62.8 - 69.4]	0.07
'Rhizobium indicum' (GCF 005862305.2)	'Rhizobium sophorae' (GCF 013087515.1)	67	[63.1 - 70.6]	54.7	[52.0 - 57.4]	66.2	[62.8 - 69.4]	0.06
'Rhizobium leguminosarum bv. trifolii SRDI565' (GCF 000371905.1)	'Rhizobium ruizarguesonis' (GCF 012349115.1)	64	[60.2 - 67.6]	54.7	[52.0 - 57.4]	63.6	[60.3 - 66.8]	0.08
'Rhizobium sophorae' (GCF 013087515.1)	Rhizobium indicum MCC 3961T	67	[63.1 - 70.6]	54.7	[52.0 - 57.4]	66.2	[62.8 - 69.4]	0.06
'Rhizobium laguerreae' (GCF 010668165.1)	'Rhizobium sp. WYCCWR 11290' (GCF 013426945.1)	70.9	[67.0 - 74.6]	54.5	[51.8 - 57.2]	69.5	[66.0 - 72.7]	0.1
'Rhizobium leguminosarum bv. phaseoli FA23' (GCF 000419705.1)	'Rhizobium sp. WYCCWR 11290' (GCF 013426945.1)	67.5	[63.7 - 71.2]	54.3	[51.6 - 57.0]	66.6	[63.2 - 69.8]	0.03
'Rhizobium leguminosarum bv. viciae 3841' (GCF 000009265.1)	'Rhizobium leguminosarum bv. trifolii' (GCF 000769405.2)	68	[64.1 - 71.6]	54.1	[51.4 - 56.8]	66.9	[63.5 - 70.1]	0.01
'Rhizobium leguminosarum bv. trifolii' (GCF 000769405.2)	Rhizobium indicum MCC 3961T	68.6	[64.7 - 72.2]	53.9	[51.2 - 56.6]	67.3	[63.9 - 70.6]	0.1
'Rhizobium leguminosarum bv. trifolii' (GCF 000769405.2)	'Rhizobium indicum' (GCF 005862305.2)	68.6	[64.7 - 72.2]	53.9	[51.2 - 56.6]	67.3	[63.9 - 70.6]	0.1
'Rhizobium leguminosarum bv. phaseoli FA23' (GCF 000419705.1)	'Rhizobium sophorae' (GCF 013087515.1)	64.9	[61.1 - 68.6]	53.9	[51.2 - 56.6]	64.2	[60.9 - 67.4]	0.01
'Rhizobium leguminosarum bv. phaseoli FA23' (GCF 000419705.1)	Rhizobium sophorae CCBAU 03386	64.9	[61.1 - 68.6]	53.9	[51.2 - 56.6]	64.2	[60.9 - 67.4]	0
'Rhizobium leguminosarum bv. viciae 3841' (GCF 000009265.1)	'Rhizobium sp. WYCCWR 11290' (GCF 013426945.1)	63.6	[59.9 - 67.3]	53.7	[51.0 - 56.4]	63	[59.7 - 66.2]	0.02
'Rhizobium leguminosarum bv. viciae TOM' (GCF 000372205.1)	'Rhizobium sp. WYCCWR 11290' (GCF 013426945.1)	71.6	[67.7 - 75.3]	53.6	[50.9 - 56.3]	69.8	[66.4 - 73.1]	0.05
'Rhizobium leguminosarum bv. viciae WSM1455' (GCF 000271805.1)	'Rhizobium leguminosarum bv. trifolii' (GCF 000769405.2)	67.1	[63.3 - 70.8]	53.6	[50.9 - 56.3]	66	[62.6 - 69.2]	0.09
'Rhizobium leguminosarum bv. trifolii WSM1325' (GCF 000023185.1)	'Rhizobium laguerreae' (GCF 010668165.1)	64.3	[60.5 - 67.9]	53.6	[50.9 - 56.2]	63.6	[60.2 - 66.8]	0.01
'Rhizobium leguminosarum bv. viciae 3841' (GCF 000009265.1)	Rhizobium sophorae CCBAU 03386	64.8	[61.0 - 68.4]	53.5	[50.8 - 56.2]	64	[60.7 - 67.2]	0.02
'Rhizobium leguminosarum bv. viciae 3841' (GCF 000009265.1)	'Rhizobium sophorae' (GCF 013087515.1)	64.8	[61.0 - 68.4]	53.5	[50.8 - 56.2]	64	[60.7 - 67.2]	0.02
'Rhizobium leguminosarum bv. viciae WSM1455' (GCF 000271805.1)	Rhizobium sophorae CCBAU 03386	65.4	[61.6 - 69.0]	53.4	[50.7 - 56.1]	64.4	[61.1 - 67.7]	0.12
'Rhizobium leguminosarum bv. viciae TOM' (GCF 000372205.1)	'Rhizobium sophorae' (GCF 013087515.1)	64.6	[60.8 - 68.2]	53.4	[50.7 - 56.1]	63.8	[60.4 - 67.0]	0
'Rhizobium leguminosarum bv. viciae TOM' (GCF 000372205.1)	Rhizobium sophorae CCBAU 03386	64.6	[60.8 - 68.2]	53.4	[50.7 - 56.1]	63.8	[60.4 - 67.0]	0.01
'Rhizobium leguminosarum bv. viciae WSM1455' (GCF 000271805.1)	'Rhizobium sp. WYCCWR 11290' (GCF 013426945.1)	64.3	[60.6 - 68.0]	53.4	[50.7 - 56.1]	63.6	[60.2 - 66.8]	0.08
'Rhizobium leguminosarum bv. viciae WSM1455' (GCF 000271805.1)	'Rhizobium sophorae' (GCF 013087515.1)	65.4	[61.6 - 69.0]	53.4	[50.7 - 56.1]	64.4	[61.1 - 67.7]	0.12
'Rhizobium leguminosarum' (GCF 001679785.1)	Rhizobium sophorae CCBAU 03386	53	[49.5 - 56.5]	53.2	[50.5 - 55.9]	53.5	[50.4 - 56.6]	0.31
'Rhizobium laguerreae' (GCF 010668165.1)	'Rhizobium sophorae' (GCF 013087515.1)	64.4	[60.6 - 68.0]	53.2	[50.5 - 55.9]	63.5	[60.2 - 66.7]	0.06
'Rhizobium leguminosarum' (GCF 001679785.1)	'Rhizobium sophorae' (GCF 013087515.1)	53	[49.5 - 56.5]	53.2	[50.5 - 55.9]	53.5	[50.4 - 56.6]	0.3
'Rhizobium leguminosarum bv. trifolii WSM1325' (GCF 000023185.1)	'Rhizobium leguminosarum bv. viciae TOM' (GCF 000372205.1)	63.1	[59.4 - 66.7]	53.2	[50.5 - 55.8]	62.5	[59.2 - 65.7]	0.06
'Rhizobium laguerreae' (GCF 010668165.1)	Rhizobium sophorae CCBAU 03386	64.4	[60.6 - 68.0]	53.2	[50.5 - 55.9]	63.5	[60.2 - 66.7]	0.06
'Rhizobium leguminosarum bv. trifolii' (GCF 000769405.2)	Rhizobium ruizarguesonis UPM1133T	65.7	[61.9 - 69.3]	53.1	[50.4 - 55.8]	64.7	[61.3 - 67.9]	0.12
'Rhizobium leguminosarum bv. viciae 3841' (GCF 000009265.1)	'Rhizobium ruizarguesonis' (GCF 012349115.1)	64.4	[60.6 - 68.0]	53.1	[50.4 - 55.8]	63.5	[60.2 - 66.7]	0.11
'Rhizobium leguminosarum bv. trifolii' (GCF 000769405.2)	'Rhizobium ruizarguesonis' (GCF 012349115.1)	65.7	[61.9 - 69.3]	53.1	[50.4 - 55.8]	64.7	[61.3 - 67.9]	0.12
'Rhizobium leguminosarum bv. viciae 3841' (GCF 000009265.1)	Rhizobium ruizarguesonis UPM1133T	64.4	[60.6 - 68.0]	53.1	[50.4 - 55.8]	63.5	[60.2 - 66.7]	0.11
'Rhizobium leguminosarum bv. trifolii WSM1325' (GCF 000023185.1)	'Rhizobium leguminosarum' (GCF 001679785.1)	52.3	[48.8 - 55.7]	53.1	[50.4 - 55.8]	52.8	[49.7 - 55.9]	0.23
'Rhizobium leguminosarum bv. trifolii WSM1325' (GCF 000023185.1)	'Rhizobium leguminosarum bv. viciae 248' (GCF 010365265.1)	61.8	[58.1 - 65.4]	53	[50.3 - 55.7]	61.3	[58.0 - 64.5]	0.17
'Rhizobium leguminosarum' (GCF 001679785.1)	'Rhizobium sp. WYCCWR 11290' (GCF 013426945.1)	58.4	[54.8 - 61.9]	53	[50.4 - 55.7]	58.3	[55.1 - 61.4]	0.34
'Rhizobium leguminosarum bv. phaseoli FA23' (GCF 000419705.1)	'Rhizobium ruizarguesonis' (GCF 012349115.1)	63.7	[59.9 - 67.3]	52.9	[50.2 - 55.6]	62.9	[59.6 - 66.1]	0.1
'Rhizobium leguminosarum bv. viciae 248' (GCF 010365265.1)	'Rhizobium sp. WYCCWR 11290' (GCF 013426945.1)	66.8	[62.9 - 70.4]	52.9	[50.2 - 55.6]	65.5	[62.1 - 68.7]	0.06
'Rhizobium leguminosarum bv. phaseoli FA23' (GCF 000419705.1)	Rhizobium ruizarguesonis UPM1133T	63.7	[59.9 - 67.3]	52.9	[50.2 - 55.6]	62.9	[59.6 - 66.1]	0.09
'Rhizobium leguminosarum' (GCF 001652265.1)	'Rhizobium leguminosarum' (GCF 001679785.1)	60.7	[57.0 - 64.3]	52.5	[49.8 - 55.1]	60.2	[56.9 - 63.3]	0.09
'Rhizobium laguerreae' (GCF 002008165.1)	'Rhizobium sophorae' (GCF 013087515.1)	62.7	[59.0 - 66.3]	52.4	[49.7 - 55.1]	61.9	[58.6 - 65.1]	0.06
'Rhizobium leguminosarum bv. viciae 248' (GCF 010365265.1)	Rhizobium sophorae CCBAU 03386	62	[58.3 - 65.6]	52.4	[49.7 - 55.1]	61.3	[58.0 - 64.5]	0.1
'Rhizobium leguminosarum bv. viciae 248' (GCF 010365265.1)	'Rhizobium sophorae' (GCF 013087515.1)	62	[58.3 - 65.6]	52.4	[49.7 - 55.1]	61.3	[58.0 - 64.5]	0.11
'Rhizobium sophorae' (GCF 013087515.1)	Rhizobium laguerreae FB206	62.7	[59.0 - 66.3]	52.4	[49.7 - 55.1]	61.9	[58.6 - 65.1]	0.06
'Rhizobium leguminosarum bv. viciae WSM1455' (GCF 000271805.1)	Rhizobium ruizarguesonis UPM1133T	66.7	[62.9 - 70.4]	52.4	[49.7 - 55.0]	65.3	[61.9 - 68.5]	0.2
'Rhizobium laguerreae' (GCF 002008165.1)	'Rhizobium sp. WYCCWR 11290' (GCF 013426945.1)	66.2	[62.4 - 69.8]	52.4	[49.7 - 55.1]	64.9	[61.5 - 68.1]	0.1
'Rhizobium leguminosarum bv. viciae WSM1455' (GCF 000271805.1)	'Rhizobium ruizarguesonis' (GCF 012349115.1)	66.7	[62.9 - 70.4]	52.4	[49.7 - 55.0]	65.3	[61.9 - 68.5]	0.21
'Rhizobium sp. WYCCWR 11290' (GCF 013426945.1)	Rhizobium laguerreae FB206	66.2	[62.4 - 69.8]	52.4	[49.7 - 55.1]	64.9	[61.5 - 68.1]	0.1
'Rhizobium laguerreae' (GCF 002008165.1)	Rhizobium sophorae CCBAU 03386	62.7	[59.0 - 66.3]	52.4	[49.7 - 55.1]	61.9	[58.6 - 65.1]	0.06
'Rhizobium leguminosarum bv. trifolii WSM1325' (GCF 000023185.1)	'Rhizobium ruizarguesonis' (GCF 012349115.1)	64.9	[61.1 - 68.6]	52.3	[49.6 - 54.9]	63.8	[60.4 - 67.0]	0.02
'Rhizobium leguminosarum bv. trifolii WSM1325' (GCF 000023185.1)	Rhizobium ruizarguesonis UPM1133T	64.9	[61.1 - 68.6]	52.3	[49.6 - 54.9]	63.8	[60.4 - 67.0]	0.01
'Rhizobium leguminosarum bv. trifolii WSM1325' (GCF 000023185.1)	'Rhizobium laguerreae' (GCF 002008165.1)	63	[59.2 - 66.6]	52.2	[49.5 - 54.8]	62.1	[58.8 - 65.3]	0.01
'Rhizobium leguminosarum bv. trifolii WSM1325' (GCF 000023185.1)	Rhizobium laguerreae FB206	63	[59.2 - 66.6]	52.2	[49.5 - 54.8]	62.1	[58.8 - 65.3]	0.01
'Rhizobium ruizarguesonis' (GCF 012349115.1)	Rhizobium leguminosarum DSM 106839	65.5	[61.7 - 69.1]	52	[49.4 - 54.7]	64.2	[60.8 - 67.4]	0.17
'Rhizobium leguminosarum' (GCF 001652265.1)	'Rhizobium leguminosarum' (GCF 004306515.1)	60.1	[56.5 - 63.7]	52	[49.4 - 54.7]	59.6	[56.3 - 62.7]	0.15
'Rhizobium leguminosarum bv. trifolii WSM1325' (GCF 000023185.1)	'Rhizobium leguminosarum' (GCF 004306515.1)	64.7	[60.9 - 68.3]	52	[49.3 - 54.6]	63.5	[60.1 - 66.7]	0
'Rhizobium leguminosarum bv. viciae USDA 2370' (GCF 002008365.1)	'Rhizobium ruizarguesonis' (GCF 012349115.1)	65.8	[62.0 - 69.4]	52	[49.4 - 54.7]	64.4	[61.1 - 67.6]	0.17
'Rhizobium leguminosarum bv. viciae USDA 2370' (GCF 002008365.1)	Rhizobium ruizarguesonis UPM1133T	65.8	[62.0 - 69.4]	52	[49.4 - 54.7]	64.4	[61.1 - 67.6]	0.17
'Rhizobium ruizarguesonis' (GCF 012349115.1)	Rhizobium leguminosarum USDA 2370	65.8	[62.0 - 69.4]	52	[49.4 - 54.7]	64.4	[61.1 - 67.6]	0.17
'Rhizobium leguminosarum bv. trifolii' (GCF 000769405.2)	Rhizobium leguminosarum USDA 2370	63.6	[59.8 - 67.2]	51.8	[49.2 - 54.5]	62.5	[59.2 - 65.7]	0.29
'Rhizobium leguminosarum bv. trifolii' (GCF 000769405.2)	Rhizobium leguminosarum DSM 106839	63.3	[59.5 - 66.9]	51.8	[49.2 - 54.5]	62.2	[58.9 - 65.4]	0.29
'Rhizobium leguminosarum bv. trifolii' (GCF 000769405.2)	'Rhizobium laguerreae' (GCF 010668165.1)	63.9	[60.2 - 67.5]	51.8	[49.2 - 54.5]	62.8	[59.5 - 66.0]	0.1
'Rhizobium leguminosarum bv. trifolii' (GCF 000769405.2)	'Rhizobium leguminosarum bv. viciae USDA 2370' (GCF 002008365.1)	63.6	[59.8 - 67.2]	51.8	[49.2 - 54.5]	62.5	[59.2 - 65.7]	0.29
'Rhizobium leguminosarum bv. trifolii' (GCF 000769405.2)	Rhizobium trifolii DSM 30141	65.3	[61.5 - 68.9]	51.7	[49.0 - 54.3]	63.9	[60.5 - 67.1]	0.32
'Rhizobium leguminosarum bv. viciae 3841' (GCF 000009265.1)	'Rhizobium leguminosarum' (GCF 001652265.1)	57.3	[53.7 - 60.8]	51.6	[48.9 - 54.2]	57	[53.8 - 60.1]	0.24
'Rhizobium leguminosarum bv. phaseoli FA23' (GCF 000419705.1)	'Rhizobium leguminosarum' (GCF 004306515.1)	65.3	[61.4 - 68.9]	51.6	[48.9 - 54.2]	63.9	[60.5 - 67.1]	0.08
'Rhizobium ruizarguesonis' (GCF 012349115.1)	Rhizobium trifolii DSM 30141	64.8	[61.0 - 68.5]	51.5	[48.8 - 54.1]	63.4	[60.1 - 66.7]	0.2
'Rhizobium ruizarguesonis' (GCF 012349115.1)	Rhizobium indicum MCC 3961T	65.8	[61.9 - 69.4]	51.5	[48.9 - 54.2]	64.3	[60.9 - 67.5]	0.03
'Rhizobium indicum' (GCF 005862305.2)	Rhizobium ruizarguesonis UPM1133T	65.8	[61.9 - 69.4]	51.5	[48.9 - 54.2]	64.3	[60.9 - 67.5]	0.02
'Rhizobium indicum' (GCF 005862305.2)	'Rhizobium ruizarguesonis' (GCF 012349115.1)	65.8	[61.9 - 69.4]	51.5	[48.9 - 54.2]	64.3	[60.9 - 67.5]	0.03
'Rhizobium leguminosarum bv. trifolii WSM1325' (GCF 000023185.1)	'Rhizobium sp. WYCCWR 11290' (GCF 013426945.1)	60.7	[57.0 - 64.3]	51.3	[48.7 - 54.0]	59.9	[56.6 - 63.1]	0.11
'Rhizobium leguminosarum bv. viciae 3841' (GCF 000009265.1)	'Rhizobium leguminosarum' (GCF 004306515.1)	64.4	[60.6 - 68.0]	51.2	[48.6 - 53.9]	63	[59.7 - 66.2]	0.09
'Rhizobium leguminosarum bv. trifolii' (GCF 000769405.2)	'Rhizobium leguminosarum bv. viciae 248' (GCF 010365265.1)	63.3	[59.6 - 66.9]	51.2	[48.6 - 53.9]	62.1	[58.8 - 65.3]	0.07
'Rhizobium leguminosarum bv. trifolii' (GCF 000769405.2)	'Rhizobium leguminosarum' (GCF 001679785.1)	53.4	[49.9 - 56.9]	51.2	[48.6 - 53.9]	53.4	[50.3 - 56.5]	0.34
'Rhizobium leguminosarum' (GCF 001652265.1)	'Rhizobium leguminosarum bv. viciae 248' (GCF 010365265.1)	61.3	[57.6 - 64.9]	51.1	[48.4 - 53.7]	60.3	[57.0 - 63.5]	0.32
'Rhizobium leguminosarum bv. phaseoli FA23' (GCF 000419705.1)	'Rhizobium leguminosarum' (GCF 001652265.1)	54.7	[51.2 - 58.2]	51.1	[48.5 - 53.8]	54.6	[51.4 - 57.7]	0.23
'Rhizobium leguminosarum' (GCF 004306515.1)	Rhizobium indicum MCC 3961T	65.4	[61.6 - 69.0]	51.1	[48.4 - 53.7]	63.8	[60.5 - 67.0]	0
'Rhizobium leguminosarum' (GCF 004306515.1)	'Rhizobium indicum' (GCF 005862305.2)	65.4	[61.6 - 69.0]	51.1	[48.4 - 53.7]	63.8	[60.5 - 67.0]	0
'Rhizobium leguminosarum bv. viciae WSM1455' (GCF 000271805.1)	'Rhizobium leguminosarum' (GCF 001652265.1)	54.6	[51.1 - 58.1]	51.1	[48.4 - 53.7]	54.5	[51.3 - 57.6]	0.34
'Rhizobium leguminosarum bv. viciae TOM' (GCF 000372205.1)	'Rhizobium leguminosarum bv. trifolii' (GCF 000769405.2)	62.9	[59.1 - 66.5]	51	[48.4 - 53.7]	61.7	[58.4 - 64.9]	0.04
'Rhizobium leguminosarum bv. viciae WSM1455' (GCF 000271805.1)	'Rhizobium leguminosarum' (GCF 004306515.1)	63.6	[59.9 - 67.2]	50.9	[48.2 - 53.5]	62.3	[59.0 - 65.5]	0.19
'Rhizobium laguerreae' (GCF 010668165.1)	Rhizobium ruizarguesonis UPM1133T	65.8	[61.9 - 69.4]	50.9	[48.2 - 53.5]	64.1	[60.7 - 67.3]	0.02
'Rhizobium laguerreae' (GCF 010668165.1)	'Rhizobium ruizarguesonis' (GCF 012349115.1)	65.8	[61.9 - 69.4]	50.9	[48.2 - 53.5]	64.1	[60.7 - 67.3]	0.03
'Rhizobium leguminosarum bv. trifolii WSM1325' (GCF 000023185.1)	'Rhizobium sophorae' (GCF 013087515.1)	61.3	[57.6 - 64.8]	50.8	[48.2 - 53.4]	60.2	[57.0 - 63.4]	0.07
'Rhizobium leguminosarum' (GCF 001652265.1)	'Rhizobium laguerreae' (GCF 010668165.1)	60.3	[56.7 - 63.9]	50.8	[48.1 - 53.4]	59.4	[56.2 - 62.6]	0.16
'Rhizobium leguminosarum bv. trifolii WSM1325' (GCF 000023185.1)	Rhizobium sophorae CCBAU 03386	61.3	[57.6 - 64.8]	50.8	[48.2 - 53.4]	60.2	[57.0 - 63.4]	0.07
'Rhizobium leguminosarum bv. viciae 248' (GCF 010365265.1)	'Rhizobium ruizarguesonis' (GCF 012349115.1)	64	[60.2 - 67.6]	50.7	[48.0 - 53.3]	62.5	[59.2 - 65.7]	0.19
'Rhizobium leguminosarum bv. trifolii' (GCF 000769405.2)	'Rhizobium leguminosarum' (GCF 001652265.1)	56.5	[52.9 - 60.0]	50.7	[48.1 - 53.3]	56.1	[52.9 - 59.2]	0.25
'Rhizobium leguminosarum bv. viciae 248' (GCF 010365265.1)	Rhizobium ruizarguesonis UPM1133T	64	[60.2 - 67.6]	50.7	[48.0 - 53.3]	62.5	[59.2 - 65.7]	0.19
'Rhizobium leguminosarum bv. trifolii WSM1325' (GCF 000023185.1)	'Rhizobium leguminosarum' (GCF 001652265.1)	55.9	[52.3 - 59.3]	50.6	[48.0 - 53.2]	55.5	[52.3 - 58.6]	0.15
'Rhizobium leguminosarum' (GCF 001679785.1)	'Rhizobium ruizarguesonis' (GCF 012349115.1)	54	[50.4 - 57.4]	50.4	[47.8 - 53.0]	53.7	[50.6 - 56.8]	0.22
'Rhizobium leguminosarum' (GCF 001679785.1)	Rhizobium ruizarguesonis UPM1133T	54	[50.4 - 57.4]	50.4	[47.8 - 53.0]	53.7	[50.6 - 56.8]	0.22
'Rhizobium leguminosarum bv. trifolii' (GCF 000769405.2)	Rhizobium laguerreae FB206	62.3	[58.5 - 65.9]	50.3	[47.7 - 53.0]	60.9	[57.7 - 64.1]	0.1
'Rhizobium leguminosarum bv. trifolii' (GCF 000769405.2)	'Rhizobium laguerreae' (GCF 002008165.1)	62.3	[58.5 - 65.9]	50.3	[47.7 - 53.0]	60.9	[57.7 - 64.1]	0.1
'Rhizobium leguminosarum' (GCF 001652265.1)	'Rhizobium indicum' (GCF 005862305.2)	57.8	[54.2 - 61.4]	50.2	[47.6 - 52.9]	57.1	[53.9 - 60.2]	0.15
'Rhizobium leguminosarum bv. viciae 3841' (GCF 000009265.1)	'Rhizobium leguminosarum bv. viciae USDA 2370' (GCF 002008365.1)	62.7	[59.0 - 66.3]	50.2	[47.6 - 52.9]	61.3	[58.0 - 64.5]	0.28
'Rhizobium leguminosarum' (GCF 001652265.1)	Rhizobium indicum MCC 3961T	57.8	[54.2 - 61.4]	50.2	[47.6 - 52.9]	57.1	[53.9 - 60.2]	0.15
'Rhizobium leguminosarum bv. viciae 3841' (GCF 000009265.1)	Rhizobium leguminosarum USDA 2370	62.7	[59.0 - 66.3]	50.2	[47.6 - 52.9]	61.3	[58.0 - 64.5]	0.28
'Rhizobium leguminosarum bv. viciae 3841' (GCF 000009265.1)	Rhizobium leguminosarum DSM 106839	62.6	[58.8 - 66.2]	50.2	[47.6 - 52.8]	61.2	[57.9 - 64.3]	0.28
'Rhizobium leguminosarum' (GCF 001652265.1)	'Rhizobium leguminosarum bv. viciae USDA 2370' (GCF 002008365.1)	57.9	[54.3 - 61.5]	50.1	[47.5 - 52.7]	57.1	[54.0 - 60.3]	0.04
'Rhizobium leguminosarum bv. trifolii WSM1325' (GCF 000023185.1)	Rhizobium trifolii DSM 30141	60.6	[57.0 - 64.2]	50.1	[47.5 - 52.7]	59.5	[56.2 - 62.6]	0.22
'Rhizobium leguminosarum' (GCF 001652265.1)	Rhizobium leguminosarum DSM 106839	57.8	[54.2 - 61.3]	50.1	[47.5 - 52.8]	57	[53.8 - 60.1]	0.04
'Rhizobium leguminosarum bv. viciae TOM' (GCF 000372205.1)	Rhizobium ruizarguesonis UPM1133T	62.1	[58.4 - 65.7]	50.1	[47.4 - 52.7]	60.7	[57.5 - 63.9]	0.08
'Rhizobium leguminosarum' (GCF 001652265.1)	Rhizobium leguminosarum USDA 2370	57.9	[54.3 - 61.5]	50.1	[47.5 - 52.7]	57.1	[54.0 - 60.3]	0.04
'Rhizobium leguminosarum bv. viciae TOM' (GCF 000372205.1)	'Rhizobium ruizarguesonis' (GCF 012349115.1)	62.1	[58.4 - 65.7]	50.1	[47.4 - 52.7]	60.7	[57.5 - 63.9]	0.08
'Rhizobium leguminosarum bv. viciae TOM' (GCF 000372205.1)	'Rhizobium leguminosarum' (GCF 001652265.1)	57.8	[54.2 - 61.3]	50	[47.4 - 52.7]	57	[53.8 - 60.1]	0.21
'Rhizobium leguminosarum bv. trifolii' (GCF 000769405.2)	'Rhizobium sp. WYCCWR 11290' (GCF 013426945.1)	63.7	[59.9 - 67.3]	50	[47.4 - 52.6]	62	[58.7 - 65.2]	0
'Rhizobium leguminosarum' (GCF 004306515.1)	'Rhizobium laguerreae' (GCF 010668165.1)	64.4	[60.6 - 68.0]	49.9	[47.2 - 52.5]	62.6	[59.3 - 65.8]	0.01
'Rhizobium leguminosarum bv. trifolii WSM1325' (GCF 000023185.1)	Rhizobium leguminosarum DSM 106839	59.2	[55.6 - 62.7]	49.9	[47.2 - 52.5]	58.2	[55.0 - 61.3]	0.19
'Rhizobium leguminosarum' (GCF 001652265.1)	Rhizobium trifolii DSM 30141	56.2	[52.7 - 59.7]	49.9	[47.3 - 52.5]	55.6	[52.5 - 58.7]	0.07
'Rhizobium leguminosarum bv. trifolii WSM1325' (GCF 000023185.1)	'Rhizobium leguminosarum bv. viciae USDA 2370' (GCF 002008365.1)	59.5	[55.9 - 63.0]	49.8	[47.2 - 52.5]	58.4	[55.2 - 61.6]	0.19
'Rhizobium leguminosarum bv. trifolii WSM1325' (GCF 000023185.1)	Rhizobium leguminosarum USDA 2370	59.5	[55.9 - 63.0]	49.8	[47.2 - 52.5]	58.4	[55.2 - 61.6]	0.19
'Rhizobium leguminosarum bv. trifolii SRDI565' (GCF 000371905.1)	'Rhizobium leguminosarum bv. viciae 248' (GCF 010365265.1)	62.7	[59.0 - 66.3]	49.8	[47.1 - 52.4]	61.2	[57.9 - 64.3]	0.27
'Rhizobium leguminosarum' (GCF 001652265.1)	'Rhizobium laguerreae' (GCF 002008165.1)	56.4	[52.8 - 59.9]	49.7	[47.1 - 52.3]	55.7	[52.5 - 58.8]	0.16
'Rhizobium leguminosarum bv. phaseoli FA23' (GCF 000419705.1)	Rhizobium leguminosarum DSM 106839	61.7	[58.0 - 65.3]	49.7	[47.1 - 52.4]	60.3	[57.0 - 63.5]	0.26
'Rhizobium leguminosarum bv. phaseoli FA23' (GCF 000419705.1)	'Rhizobium leguminosarum bv. viciae USDA 2370' (GCF 002008365.1)	61.9	[58.2 - 65.5]	49.7	[47.1 - 52.4]	60.5	[57.2 - 63.7]	0.26
'Rhizobium leguminosarum bv. trifolii SRDI565' (GCF 000371905.1)	'Rhizobium leguminosarum bv. phaseoli FA23' (GCF 000419705.1)	58.3	[54.7 - 61.9]	49.7	[47.1 - 52.3]	57.4	[54.2 - 60.5]	0.17
'Rhizobium leguminosarum bv. phaseoli FA23' (GCF 000419705.1)	Rhizobium leguminosarum USDA 2370	61.9	[58.2 - 65.5]	49.7	[47.1 - 52.4]	60.5	[57.2 - 63.7]	0.26
'Rhizobium leguminosarum' (GCF 001652265.1)	Rhizobium laguerreae FB206	56.4	[52.8 - 59.9]	49.7	[47.1 - 52.3]	55.7	[52.5 - 58.8]	0.16
'Rhizobium leguminosarum' (GCF 001679785.1)	'Rhizobium leguminosarum' (GCF 004306515.1)	54.2	[50.7 - 57.7]	49.7	[47.1 - 52.3]	53.8	[50.7 - 56.9]	0.24
'Rhizobium leguminosarum bv. viciae USDA 2370' (GCF 002008365.1)	Rhizobium indicum MCC 3961T	63.9	[60.1 - 67.5]	49.6	[47.0 - 52.3]	62.2	[58.8 - 65.3]	0.19
'Rhizobium leguminosarum bv. trifolii SRDI565' (GCF 000371905.1)	'Rhizobium leguminosarum' (GCF 004306515.1)	62.6	[58.8 - 66.1]	49.6	[46.9 - 52.2]	61	[57.7 - 64.1]	0.1
'Rhizobium indicum' (GCF 005862305.2)	Rhizobium leguminosarum USDA 2370	63.9	[60.1 - 67.5]	49.6	[47.0 - 52.3]	62.2	[58.8 - 65.3]	0.19
'Rhizobium leguminosarum bv. viciae USDA 2370' (GCF 002008365.1)	'Rhizobium indicum' (GCF 005862305.2)	63.9	[60.1 - 67.5]	49.6	[47.0 - 52.3]	62.2	[58.8 - 65.3]	0.19
'Rhizobium indicum' (GCF 005862305.2)	Rhizobium leguminosarum DSM 106839	63.6	[59.8 - 67.2]	49.6	[47.0 - 52.3]	61.9	[58.6 - 65.1]	0.19
'Rhizobium indicum' (GCF 005862305.2)	Rhizobium trifolii DSM 30141	62.1	[58.4 - 65.7]	49.5	[46.9 - 52.2]	60.6	[57.3 - 63.8]	0.22
'Rhizobium laguerreae' (GCF 002008165.1)	Rhizobium ruizarguesonis UPM1133T	60.2	[56.5 - 63.7]	49.5	[46.9 - 52.1]	58.9	[55.7 - 62.1]	0.02
'Rhizobium laguerreae' (GCF 002008165.1)	'Rhizobium ruizarguesonis' (GCF 012349115.1)	60.2	[56.5 - 63.7]	49.5	[46.9 - 52.1]	58.9	[55.7 - 62.1]	0.03
'Rhizobium ruizarguesonis' (GCF 012349115.1)	Rhizobium laguerreae FB206	60.2	[56.5 - 63.7]	49.5	[46.9 - 52.1]	58.9	[55.7 - 62.1]	0.03
'Rhizobium leguminosarum bv. viciae 3841' (GCF 000009265.1)	Rhizobium trifolii DSM 30141	60.2	[56.6 - 63.8]	49.4	[46.8 - 52.1]	59	[55.7 - 62.1]	0.31
'Rhizobium leguminosarum' (GCF 004306515.1)	'Rhizobium sp. WYCCWR 11290' (GCF 013426945.1)	61.7	[58.0 - 65.3]	49.4	[46.8 - 52.0]	60.2	[57.0 - 63.4]	0.11
'Rhizobium leguminosarum bv. trifolii' (GCF 000769405.2)	Rhizobium sophorae CCBAU 03386	64.3	[60.5 - 67.9]	49.4	[46.8 - 52.0]	62.4	[59.1 - 65.6]	0.03
'Rhizobium leguminosarum bv. trifolii' (GCF 000769405.2)	'Rhizobium sophorae' (GCF 013087515.1)	64.3	[60.5 - 67.9]	49.4	[46.8 - 52.0]	62.4	[59.1 - 65.6]	0.04
'Rhizobium leguminosarum bv. phaseoli FA23' (GCF 000419705.1)	Rhizobium trifolii DSM 30141	59.6	[56.0 - 63.2]	49.4	[46.8 - 52.0]	58.4	[55.2 - 61.6]	0.3
'Rhizobium leguminosarum bv. viciae WSM1455' (GCF 000271805.1)	Rhizobium leguminosarum DSM 106839	60.3	[56.6 - 63.9]	49.3	[46.7 - 51.9]	59	[55.8 - 62.1]	0.38
'Rhizobium leguminosarum bv. viciae WSM1455' (GCF 000271805.1)	'Rhizobium leguminosarum bv. viciae USDA 2370' (GCF 002008365.1)	60.6	[56.9 - 64.2]	49.3	[46.7 - 51.9]	59.2	[56.0 - 62.4]	0.38
'Rhizobium leguminosarum bv. viciae WSM1455' (GCF 000271805.1)	Rhizobium leguminosarum USDA 2370	60.6	[56.9 - 64.2]	49.3	[46.7 - 51.9]	59.2	[56.0 - 62.4]	0.38
'Rhizobium leguminosarum bv. viciae 3841' (GCF 000009265.1)	'Rhizobium leguminosarum bv. trifolii SRDI565' (GCF 000371905.1)	57.4	[53.8 - 61.0]	49.3	[46.7 - 51.9]	56.5	[53.3 - 59.6]	0.19
'Rhizobium leguminosarum' (GCF 004306515.1)	'Rhizobium leguminosarum bv. viciae 248' (GCF 010365265.1)	62.9	[59.2 - 66.5]	49.2	[46.6 - 51.9]	61.2	[57.9 - 64.4]	0.17
'Rhizobium leguminosarum' (GCF 004306515.1)	'Rhizobium sophorae' (GCF 013087515.1)	61.4	[57.7 - 65.0]	49.2	[46.6 - 51.9]	59.9	[56.6 - 63.1]	0.07
'Rhizobium ruizarguesonis' (GCF 012349115.1)	'Rhizobium sp. WYCCWR 11290' (GCF 013426945.1)	63.1	[59.3 - 66.7]	49.2	[46.6 - 51.9]	61.3	[58.0 - 64.5]	0.13
'Rhizobium leguminosarum' (GCF 004306515.1)	Rhizobium sophorae CCBAU 03386	61.4	[57.7 - 65.0]	49.2	[46.6 - 51.9]	59.9	[56.6 - 63.1]	0.07
'Rhizobium sp. WYCCWR 11290' (GCF 013426945.1)	Rhizobium ruizarguesonis UPM1133T	63.1	[59.3 - 66.7]	49.2	[46.6 - 51.9]	61.3	[58.0 - 64.5]	0.12
'Rhizobium leguminosarum bv. trifolii SRDI565' (GCF 000371905.1)	'Rhizobium laguerreae' (GCF 010668165.1)	60.8	[57.1 - 64.4]	49.2	[46.6 - 51.8]	59.4	[56.1 - 62.5]	0.11
'Rhizobium leguminosarum bv. viciae TOM' (GCF 000372205.1)	'Rhizobium leguminosarum' (GCF 004306515.1)	63.3	[59.6 - 66.9]	49.2	[46.6 - 51.8]	61.5	[58.2 - 64.7]	0.06
'Rhizobium leguminosarum bv. trifolii SRDI565' (GCF 000371905.1)	'Rhizobium leguminosarum bv. trifolii' (GCF 000769405.2)	64.3	[60.5 - 67.9]	49.1	[46.5 - 51.7]	62.3	[59.0 - 65.5]	0.2
'Rhizobium leguminosarum bv. viciae WSM1455' (GCF 000271805.1)	Rhizobium trifolii DSM 30141	58.1	[54.5 - 61.6]	49	[46.4 - 51.6]	57	[53.8 - 60.2]	0.41
'Rhizobium leguminosarum bv. trifolii SRDI565' (GCF 000371905.1)	'Rhizobium indicum' (GCF 005862305.2)	59	[55.4 - 62.6]	48.8	[46.1 - 51.4]	57.8	[54.5 - 60.9]	0.1
'Rhizobium leguminosarum bv. viciae WSM1455' (GCF 000271805.1)	'Rhizobium leguminosarum bv. trifolii SRDI565' (GCF 000371905.1)	59.5	[55.8 - 63.0]	48.8	[46.2 - 51.4]	58.1	[54.9 - 61.3]	0.29
'Rhizobium leguminosarum bv. trifolii SRDI565' (GCF 000371905.1)	Rhizobium indicum MCC 3961T	59	[55.4 - 62.6]	48.8	[46.1 - 51.4]	57.8	[54.5 - 60.9]	0.1
'Rhizobium leguminosarum bv. trifolii WSM1325' (GCF 000023185.1)	'Rhizobium leguminosarum bv. trifolii SRDI565' (GCF 000371905.1)	59.2	[55.6 - 62.8]	48.8	[46.2 - 51.5]	57.9	[54.7 - 61.1]	0.1
'Rhizobium leguminosarum bv. viciae USDA 2370' (GCF 002008365.1)	'Rhizobium laguerreae' (GCF 010668165.1)	61.2	[57.5 - 64.8]	48.7	[46.1 - 51.3]	59.6	[56.3 - 62.8]	0.2
'Rhizobium laguerreae' (GCF 010668165.1)	Rhizobium leguminosarum USDA 2370	61.2	[57.5 - 64.8]	48.7	[46.1 - 51.3]	59.6	[56.3 - 62.8]	0.2
'Rhizobium laguerreae' (GCF 010668165.1)	Rhizobium leguminosarum DSM 106839	61.1	[57.4 - 64.7]	48.7	[46.1 - 51.3]	59.5	[56.3 - 62.7]	0.2
'Rhizobium laguerreae' (GCF 002008165.1)	'Rhizobium leguminosarum' (GCF 004306515.1)	59.9	[56.3 - 63.5]	48.6	[46.0 - 51.2]	58.5	[55.2 - 61.6]	0.01
'Rhizobium leguminosarum' (GCF 004306515.1)	Rhizobium laguerreae FB206	59.9	[56.3 - 63.5]	48.6	[46.0 - 51.2]	58.5	[55.2 - 61.6]	0.01
'Rhizobium leguminosarum bv. trifolii SRDI565' (GCF 000371905.1)	'Rhizobium leguminosarum' (GCF 001679785.1)	53.2	[49.7 - 56.6]	48.6	[46.0 - 51.2]	52.6	[49.5 - 55.7]	0.14
'Rhizobium leguminosarum' (GCF 001679785.1)	Rhizobium leguminosarum DSM 106839	53.9	[50.4 - 57.3]	48.5	[45.9 - 51.1]	53.2	[50.1 - 56.3]	0.05
'Rhizobium leguminosarum bv. viciae USDA 2370' (GCF 002008365.1)	'Rhizobium sp. WYCCWR 11290' (GCF 013426945.1)	58.4	[54.8 - 62.0]	48.4	[45.8 - 51.0]	57.1	[53.9 - 60.3]	0.3
'Rhizobium sp. WYCCWR 11290' (GCF 013426945.1)	Rhizobium leguminosarum DSM 106839	58.2	[54.6 - 61.7]	48.4	[45.8 - 51.0]	56.9	[53.7 - 60.0]	0.3
'Rhizobium leguminosarum' (GCF 001652265.1)	'Rhizobium sp. WYCCWR 11290' (GCF 013426945.1)	54.9	[51.4 - 58.4]	48.4	[45.8 - 51.0]	54.1	[51.0 - 57.2]	0.26
'Rhizobium sp. WYCCWR 11290' (GCF 013426945.1)	Rhizobium leguminosarum USDA 2370	58.4	[54.8 - 62.0]	48.4	[45.8 - 51.0]	57.1	[53.9 - 60.3]	0.3
'Rhizobium leguminosarum bv. viciae TOM' (GCF 000372205.1)	Rhizobium leguminosarum DSM 106839	58.6	[55.0 - 62.2]	48.4	[45.8 - 51.0]	57.3	[54.1 - 60.4]	0.25
'Rhizobium leguminosarum' (GCF 001679785.1)	'Rhizobium leguminosarum bv. viciae USDA 2370' (GCF 002008365.1)	53.7	[50.2 - 57.2]	48.4	[45.8 - 51.0]	53.1	[50.0 - 56.1]	0.05
'Rhizobium leguminosarum' (GCF 001679785.1)	Rhizobium leguminosarum USDA 2370	53.7	[50.2 - 57.2]	48.4	[45.8 - 51.0]	53.1	[50.0 - 56.1]	0.05
'Rhizobium leguminosarum bv. viciae 248' (GCF 010365265.1)	Rhizobium leguminosarum DSM 106839	58.2	[54.6 - 61.7]	48.3	[45.7 - 51.0]	56.9	[53.7 - 60.0]	0.36
'Rhizobium leguminosarum bv. trifolii SRDI565' (GCF 000371905.1)	'Rhizobium leguminosarum bv. viciae TOM' (GCF 000372205.1)	59.7	[56.1 - 63.3]	48.3	[45.7 - 50.9]	58.2	[55.0 - 61.4]	0.16
'Rhizobium leguminosarum bv. viciae TOM' (GCF 000372205.1)	'Rhizobium leguminosarum bv. viciae USDA 2370' (GCF 002008365.1)	59	[55.3 - 62.5]	48.3	[45.7 - 50.9]	57.6	[54.4 - 60.7]	0.25
'Rhizobium sophorae' (GCF 013087515.1)	Rhizobium ruizarguesonis UPM1133T	59.9	[56.2 - 63.4]	48.3	[45.7 - 50.9]	58.3	[55.1 - 61.5]	0.08
'Rhizobium leguminosarum bv. viciae 248' (GCF 010365265.1)	Rhizobium leguminosarum USDA 2370	58.4	[54.8 - 61.9]	48.3	[45.7 - 51.0]	57.1	[53.9 - 60.2]	0.36
'Rhizobium leguminosarum bv. viciae USDA 2370' (GCF 002008365.1)	'Rhizobium leguminosarum bv. viciae 248' (GCF 010365265.1)	58.4	[54.8 - 61.9]	48.3	[45.7 - 51.0]	57.1	[53.9 - 60.2]	0.36
'Rhizobium ruizarguesonis' (GCF 012349115.1)	Rhizobium sophorae CCBAU 03386	59.9	[56.2 - 63.4]	48.3	[45.7 - 50.9]	58.3	[55.1 - 61.5]	0.09
'Rhizobium leguminosarum bv. viciae TOM' (GCF 000372205.1)	Rhizobium leguminosarum USDA 2370	59	[55.3 - 62.5]	48.3	[45.7 - 50.9]	57.6	[54.4 - 60.7]	0.25
'Rhizobium ruizarguesonis' (GCF 012349115.1)	'Rhizobium sophorae' (GCF 013087515.1)	59.9	[56.2 - 63.4]	48.3	[45.7 - 50.9]	58.3	[55.1 - 61.5]	0.09
'Rhizobium leguminosarum bv. trifolii SRDI565' (GCF 000371905.1)	'Rhizobium laguerreae' (GCF 002008165.1)	60.9	[57.3 - 64.5]	48.2	[45.6 - 50.8]	59.2	[56.0 - 62.4]	0.11
'Rhizobium laguerreae' (GCF 010668165.1)	Rhizobium trifolii DSM 30141	59	[55.4 - 62.6]	48.2	[45.6 - 50.8]	57.6	[54.4 - 60.8]	0.23
'Rhizobium leguminosarum bv. trifolii SRDI565' (GCF 000371905.1)	Rhizobium laguerreae FB206	60.9	[57.3 - 64.5]	48.2	[45.6 - 50.8]	59.2	[56.0 - 62.4]	0.11
'Rhizobium leguminosarum bv. viciae 248' (GCF 010365265.1)	Rhizobium trifolii DSM 30141	57.5	[53.9 - 61.0]	48.1	[45.5 - 50.7]	56.2	[53.0 - 59.3]	0.39
'Rhizobium leguminosarum' (GCF 001679785.1)	Rhizobium trifolii DSM 30141	51	[47.6 - 54.5]	48.1	[45.5 - 50.7]	50.6	[47.6 - 53.7]	0.02
'Rhizobium leguminosarum bv. viciae TOM' (GCF 000372205.1)	Rhizobium trifolii DSM 30141	58.7	[55.0 - 62.2]	48	[45.4 - 50.6]	57.2	[54.0 - 60.4]	0.28
'Rhizobium sophorae' (GCF 013087515.1)	Rhizobium leguminosarum DSM 106839	57.8	[54.2 - 61.3]	47.9	[45.3 - 50.5]	56.4	[53.2 - 59.5]	0.25
'Rhizobium sophorae' (GCF 013087515.1)	Rhizobium leguminosarum USDA 2370	58	[54.4 - 61.6]	47.9	[45.3 - 50.5]	56.7	[53.5 - 59.8]	0.26
'Rhizobium leguminosarum bv. viciae USDA 2370' (GCF 002008365.1)	'Rhizobium sophorae' (GCF 013087515.1)	58	[54.4 - 61.6]	47.9	[45.3 - 50.5]	56.7	[53.5 - 59.8]	0.26
'Rhizobium leguminosarum bv. viciae USDA 2370' (GCF 002008365.1)	Rhizobium sophorae CCBAU 03386	58	[54.4 - 61.6]	47.9	[45.3 - 50.5]	56.7	[53.5 - 59.8]	0.26
'Rhizobium sp. WYCCWR 11290' (GCF 013426945.1)	Rhizobium trifolii DSM 30141	58.6	[55.0 - 62.1]	47.9	[45.3 - 50.5]	57.2	[54.0 - 60.3]	0.33
'Rhizobium leguminosarum bv. trifolii SRDI565' (GCF 000371905.1)	'Rhizobium leguminosarum bv. viciae USDA 2370' (GCF 002008365.1)	58.2	[54.6 - 61.7]	47.8	[45.2 - 50.4]	56.7	[53.6 - 59.9]	0.09
'Rhizobium leguminosarum bv. trifolii SRDI565' (GCF 000371905.1)	Rhizobium leguminosarum DSM 106839	57.9	[54.3 - 61.4]	47.8	[45.2 - 50.4]	56.5	[53.4 - 59.7]	0.09
'Rhizobium leguminosarum bv. trifolii SRDI565' (GCF 000371905.1)	Rhizobium trifolii DSM 30141	60.8	[57.1 - 64.3]	47.8	[45.2 - 50.4]	58.9	[55.7 - 62.1]	0.12
'Rhizobium leguminosarum bv. trifolii SRDI565' (GCF 000371905.1)	Rhizobium leguminosarum USDA 2370	58.2	[54.6 - 61.7]	47.8	[45.2 - 50.4]	56.7	[53.6 - 59.9]	0.09
'Rhizobium leguminosarum' (GCF 001652265.1)	Rhizobium sophorae CCBAU 03386	53.4	[49.9 - 56.9]	47.5	[45.0 - 50.1]	52.6	[49.5 - 55.7]	0.22
'Rhizobium laguerreae' (GCF 002008165.1)	Rhizobium leguminosarum DSM 106839	58.5	[54.9 - 62.0]	47.5	[44.9 - 50.1]	56.9	[53.7 - 60.0]	0.2
'Rhizobium laguerreae' (GCF 002008165.1)	Rhizobium leguminosarum USDA 2370	58.7	[55.1 - 62.3]	47.5	[44.9 - 50.1]	57.1	[53.9 - 60.2]	0.2
'Rhizobium laguerreae' (GCF 002008165.1)	'Rhizobium leguminosarum bv. viciae USDA 2370' (GCF 002008365.1)	58.7	[55.1 - 62.3]	47.5	[44.9 - 50.1]	57.1	[53.9 - 60.2]	0.2
'Rhizobium leguminosarum' (GCF 001652265.1)	'Rhizobium sophorae' (GCF 013087515.1)	53.4	[49.9 - 56.9]	47.5	[45.0 - 50.1]	52.6	[49.5 - 55.7]	0.22
'Rhizobium leguminosarum bv. viciae USDA 2370' (GCF 002008365.1)	Rhizobium laguerreae FB206	58.7	[55.1 - 62.3]	47.5	[44.9 - 50.1]	57.1	[53.9 - 60.2]	0.2
'Rhizobium sophorae' (GCF 013087515.1)	Rhizobium trifolii DSM 30141	58.5	[54.9 - 62.0]	47.4	[44.9 - 50.0]	56.9	[53.8 - 60.1]	0.29
'Rhizobium laguerreae' (GCF 002008165.1)	Rhizobium trifolii DSM 30141	56.7	[53.2 - 60.2]	47.2	[44.6 - 49.8]	55.4	[52.2 - 58.5]	0.23
'Rhizobium leguminosarum bv. trifolii SRDI565' (GCF 000371905.1)	'Rhizobium sp. WYCCWR 11290' (GCF 013426945.1)	56.8	[53.2 - 60.3]	46.7	[44.1 - 49.3]	55.3	[52.1 - 58.4]	0.21
'Rhizobium leguminosarum bv. trifolii SRDI565' (GCF 000371905.1)	Rhizobium sophorae CCBAU 03386	56.7	[53.1 - 60.2]	46.6	[44.0 - 49.2]	55.1	[52.0 - 58.2]	0.17
'Rhizobium leguminosarum bv. trifolii SRDI565' (GCF 000371905.1)	'Rhizobium sophorae' (GCF 013087515.1)	56.7	[53.1 - 60.2]	46.6	[44.0 - 49.2]	55.1	[52.0 - 58.2]	0.16
'Rhizobium leguminosarum' (GCF 004306515.1)	Rhizobium anhuiense CGMCC 1.12621	64.1	[60.3 - 67.7]	44.3	[41.7 - 46.8]	60.6	[57.3 - 63.8]	0.34
'Rhizobium leguminosarum' (GCF 004306515.1)	Rhizobium anhuiense CCBAU 23252	65.6	[61.7 - 69.2]	44.3	[41.7 - 46.8]	61.8	[58.5 - 65.0]	0.36
'Rhizobium anhuiense' (GCF 003985145.1)	'Rhizobium leguminosarum' (GCF 004306515.1)	64.2	[60.5 - 67.8]	44.3	[41.7 - 46.8]	60.7	[57.4 - 63.9]	0.36
'Rhizobium anhuiense' (GCF 003985145.1)	Rhizobium leguminosarum USDA 2370	62.7	[59.0 - 66.3]	43.9	[41.4 - 46.5]	59.3	[56.1 - 62.5]	0.54
'Rhizobium leguminosarum bv. viciae USDA 2370' (GCF 002008365.1)	Rhizobium anhuiense CGMCC 1.12621	62.6	[58.9 - 66.2]	43.9	[41.4 - 46.5]	59.2	[56.0 - 62.4]	0.53
'Rhizobium anhuiense' (GCF 003985145.1)	Rhizobium leguminosarum DSM 106839	62.4	[58.7 - 66.0]	43.9	[41.4 - 46.5]	59.1	[55.8 - 62.2]	0.54
'Rhizobium leguminosarum bv. viciae USDA 2370' (GCF 002008365.1)	Rhizobium anhuiense CCBAU 23252	64.8	[61.0 - 68.4]	43.9	[41.4 - 46.5]	61	[57.8 - 64.2]	0.55
'Rhizobium leguminosarum bv. viciae USDA 2370' (GCF 002008365.1)	'Rhizobium anhuiense' (GCF 003985145.1)	62.7	[59.0 - 66.3]	43.9	[41.4 - 46.5]	59.3	[56.1 - 62.5]	0.54
'Rhizobium anhuiense' (GCF 003985145.1)	Rhizobium trifolii DSM 30141	62.2	[58.5 - 65.8]	43.8	[41.3 - 46.4]	58.9	[55.7 - 62.1]	0.58
'Rhizobium ruizarguesonis' (GCF 012349115.1)	Rhizobium anhuiense CCBAU 23252	63.7	[59.9 - 67.3]	43.3	[40.8 - 45.9]	59.9	[56.7 - 63.1]	0.38
'Rhizobium ruizarguesonis' (GCF 012349115.1)	Rhizobium anhuiense CGMCC 1.12621	61.8	[58.1 - 65.4]	43.3	[40.8 - 45.8]	58.4	[55.2 - 61.5]	0.36
'Rhizobium anhuiense' (GCF 003985145.1)	Rhizobium ruizarguesonis UPM1133T	62	[58.2 - 65.5]	43.3	[40.8 - 45.8]	58.5	[55.3 - 61.7]	0.37
'Rhizobium anhuiense' (GCF 003985145.1)	'Rhizobium ruizarguesonis' (GCF 012349115.1)	62	[58.2 - 65.5]	43.3	[40.8 - 45.8]	58.5	[55.3 - 61.7]	0.38
'Rhizobium anhuiense' (GCF 003985145.1)	'Rhizobium sp. WYCCWR 11290' (GCF 013426945.1)	58.9	[55.2 - 62.4]	43	[40.5 - 45.6]	55.9	[52.7 - 59.0]	0.25
'Rhizobium sp. WYCCWR 11290' (GCF 013426945.1)	Rhizobium anhuiense CGMCC 1.12621	58.7	[55.1 - 62.3]	43	[40.5 - 45.6]	55.8	[52.6 - 58.9]	0.23
'Rhizobium sp. WYCCWR 11290' (GCF 013426945.1)	Rhizobium anhuiense CCBAU 23252	59.5	[55.8 - 63.0]	43	[40.5 - 45.6]	56.4	[53.2 - 59.5]	0.25
'Rhizobium anhuiense' (GCF 003985145.1)	Rhizobium indicum MCC 3961T	60.3	[56.6 - 63.8]	42.9	[40.4 - 45.5]	57	[53.8 - 60.2]	0.35
'Rhizobium indicum' (GCF 005862305.2)	Rhizobium anhuiense CCBAU 23252	61.4	[57.7 - 65.0]	42.9	[40.4 - 45.5]	57.9	[54.7 - 61.1]	0.36
'Rhizobium leguminosarum bv. viciae 3841' (GCF 000009265.1)	Rhizobium anhuiense CCBAU 23252	60.2	[56.6 - 63.8]	42.9	[40.4 - 45.5]	57	[53.8 - 60.1]	0.27
'Rhizobium leguminosarum bv. viciae 3841' (GCF 000009265.1)	'Rhizobium anhuiense' (GCF 003985145.1)	58.6	[55.0 - 62.2]	42.9	[40.4 - 45.5]	55.7	[52.5 - 58.8]	0.26
'Rhizobium anhuiense' (GCF 003985145.1)	'Rhizobium indicum' (GCF 005862305.2)	60.3	[56.6 - 63.8]	42.9	[40.4 - 45.5]	57	[53.8 - 60.2]	0.35
'Rhizobium indicum' (GCF 005862305.2)	Rhizobium anhuiense CGMCC 1.12621	60.2	[56.5 - 63.7]	42.9	[40.4 - 45.5]	56.9	[53.7 - 60.1]	0.34
'Rhizobium leguminosarum bv. viciae 3841' (GCF 000009265.1)	Rhizobium anhuiense CGMCC 1.12621	58.5	[54.9 - 62.1]	42.9	[40.4 - 45.5]	55.6	[52.4 - 58.7]	0.25
'Rhizobium leguminosarum bv. trifolii' (GCF 000769405.2)	Rhizobium anhuiense CGMCC 1.12621	61.5	[57.8 - 65.0]	42.7	[40.2 - 45.3]	57.9	[54.7 - 61.0]	0.24
'Rhizobium leguminosarum bv. trifolii' (GCF 000769405.2)	Rhizobium anhuiense CCBAU 23252	61.5	[57.8 - 65.1]	42.7	[40.2 - 45.2]	57.9	[54.7 - 61.1]	0.26
'Rhizobium leguminosarum bv. trifolii' (GCF 000769405.2)	'Rhizobium anhuiense' (GCF 003985145.1)	61.6	[57.9 - 65.2]	42.7	[40.2 - 45.3]	58	[54.8 - 61.1]	0.25
'Rhizobium leguminosarum bv. phaseoli FA23' (GCF 000419705.1)	'Rhizobium anhuiense' (GCF 003985145.1)	58.6	[55.0 - 62.1]	42.7	[40.1 - 45.2]	55.6	[52.4 - 58.7]	0.28
'Rhizobium leguminosarum bv. phaseoli FA23' (GCF 000419705.1)	Rhizobium anhuiense CCBAU 23252	59.8	[56.1 - 63.3]	42.6	[40.1 - 45.2]	56.5	[53.4 - 59.7]	0.29
'Rhizobium leguminosarum bv. trifolii WSM1325' (GCF 000023185.1)	Rhizobium anhuiense CGMCC 1.12621	57.6	[54.0 - 61.1]	42.6	[40.1 - 45.1]	54.7	[51.6 - 57.8]	0.34
'Rhizobium leguminosarum bv. phaseoli FA23' (GCF 000419705.1)	Rhizobium anhuiense CGMCC 1.12621	58.5	[54.9 - 62.0]	42.6	[40.1 - 45.2]	55.5	[52.3 - 58.6]	0.27
'Rhizobium leguminosarum' (GCF 001652265.1)	Rhizobium anhuiense CGMCC 1.12621	52.8	[49.3 - 56.2]	42.6	[40.1 - 45.2]	50.7	[47.7 - 53.8]	0.49
'Rhizobium leguminosarum bv. trifolii WSM1325' (GCF 000023185.1)	'Rhizobium anhuiense' (GCF 003985145.1)	57.7	[54.1 - 61.2]	42.6	[40.1 - 45.1]	54.8	[51.7 - 57.9]	0.36
'Rhizobium leguminosarum' (GCF 001652265.1)	'Rhizobium anhuiense' (GCF 003985145.1)	52.9	[49.4 - 56.3]	42.6	[40.1 - 45.2]	50.8	[47.8 - 53.9]	0.5
'Rhizobium leguminosarum' (GCF 001652265.1)	Rhizobium anhuiense CCBAU 23252	55.2	[51.7 - 58.7]	42.6	[40.1 - 45.2]	52.8	[49.7 - 55.8]	0.51
'Rhizobium leguminosarum bv. trifolii WSM1325' (GCF 000023185.1)	Rhizobium anhuiense CCBAU 23252	58.5	[54.8 - 62.0]	42.6	[40.1 - 45.1]	55.4	[52.3 - 58.5]	0.36
'Rhizobium leguminosarum bv. viciae WSM1455' (GCF 000271805.1)	Rhizobium anhuiense CGMCC 1.12621	57.9	[54.3 - 61.4]	42.5	[40.0 - 45.1]	54.9	[51.8 - 58.0]	0.15
'Rhizobium leguminosarum bv. viciae WSM1455' (GCF 000271805.1)	'Rhizobium anhuiense' (GCF 003985145.1)	58	[54.4 - 61.5]	42.5	[40.0 - 45.1]	55	[51.9 - 58.1]	0.17
'Rhizobium leguminosarum bv. viciae WSM1455' (GCF 000271805.1)	Rhizobium anhuiense CCBAU 23252	59.1	[55.5 - 62.7]	42.5	[40.0 - 45.1]	56	[52.8 - 59.1]	0.17
'Rhizobium laguerreae' (GCF 010668165.1)	Rhizobium anhuiense CGMCC 1.12621	59	[55.4 - 62.6]	42.4	[39.9 - 45.0]	55.8	[52.7 - 58.9]	0.33
'Rhizobium sophorae' (GCF 013087515.1)	Rhizobium anhuiense CGMCC 1.12621	57.7	[54.1 - 61.2]	42.4	[39.9 - 44.9]	54.7	[51.6 - 57.9]	0.28
'Rhizobium sophorae' (GCF 013087515.1)	Rhizobium anhuiense CCBAU 23252	58.9	[55.3 - 62.5]	42.4	[39.9 - 44.9]	55.7	[52.6 - 58.8]	0.3
'Rhizobium anhuiense' (GCF 003985145.1)	Rhizobium sophorae CCBAU 03386	57.8	[54.2 - 61.4]	42.4	[39.9 - 44.9]	54.8	[51.7 - 57.9]	0.28
'Rhizobium leguminosarum bv. viciae 248' (GCF 010365265.1)	Rhizobium anhuiense CCBAU 23252	58.4	[54.8 - 61.9]	42.4	[39.9 - 44.9]	55.3	[52.1 - 58.4]	0.19
'Rhizobium anhuiense' (GCF 003985145.1)	'Rhizobium laguerreae' (GCF 010668165.1)	59.1	[55.5 - 62.7]	42.4	[39.9 - 45.0]	55.9	[52.8 - 59.0]	0.35
'Rhizobium leguminosarum bv. viciae 248' (GCF 010365265.1)	Rhizobium anhuiense CGMCC 1.12621	58.1	[54.5 - 61.7]	42.4	[39.9 - 44.9]	55.1	[52.0 - 58.2]	0.17
'Rhizobium laguerreae' (GCF 010668165.1)	Rhizobium anhuiense CCBAU 23252	59.6	[55.9 - 63.1]	42.4	[39.9 - 44.9]	56.3	[53.1 - 59.4]	0.35
'Rhizobium anhuiense' (GCF 003985145.1)	'Rhizobium leguminosarum bv. viciae 248' (GCF 010365265.1)	58.3	[54.6 - 61.8]	42.4	[39.9 - 45.0]	55.2	[52.1 - 58.3]	0.18
'Rhizobium anhuiense' (GCF 003985145.1)	'Rhizobium sophorae' (GCF 013087515.1)	57.8	[54.2 - 61.4]	42.4	[39.9 - 44.9]	54.8	[51.7 - 57.9]	0.29
'Rhizobium leguminosarum' (GCF 001679785.1)	'Rhizobium anhuiense' (GCF 003985145.1)	49.9	[46.5 - 53.4]	42.2	[39.7 - 44.7]	48.2	[45.2 - 51.3]	0.59
'Rhizobium leguminosarum' (GCF 001679785.1)	Rhizobium anhuiense CCBAU 23252	52.8	[49.3 - 56.2]	42.2	[39.7 - 44.8]	50.6	[47.5 - 53.7]	0.6
'Rhizobium leguminosarum' (GCF 001679785.1)	Rhizobium anhuiense CGMCC 1.12621	49.8	[46.4 - 53.2]	42.2	[39.7 - 44.8]	48.1	[45.1 - 51.2]	0.58
'Rhizobium leguminosarum bv. viciae TOM' (GCF 000372205.1)	Rhizobium anhuiense CGMCC 1.12621	59.1	[55.5 - 62.7]	41.7	[39.2 - 44.3]	55.7	[52.5 - 58.8]	0.28
'Rhizobium leguminosarum bv. viciae TOM' (GCF 000372205.1)	Rhizobium anhuiense CCBAU 23252	59.9	[56.2 - 63.4]	41.7	[39.2 - 44.3]	56.3	[53.1 - 59.4]	0.3
'Rhizobium laguerreae' (GCF 002008165.1)	'Rhizobium anhuiense' (GCF 003985145.1)	56.3	[52.8 - 59.8]	41.7	[39.2 - 44.3]	53.4	[50.3 - 56.5]	0.35
'Rhizobium laguerreae' (GCF 002008165.1)	Rhizobium anhuiense CGMCC 1.12621	56.2	[52.6 - 59.7]	41.7	[39.2 - 44.3]	53.3	[50.2 - 56.4]	0.33
'Rhizobium anhuiense' (GCF 003985145.1)	Rhizobium laguerreae FB206	56.3	[52.8 - 59.8]	41.7	[39.2 - 44.3]	53.4	[50.3 - 56.5]	0.35
'Rhizobium laguerreae' (GCF 002008165.1)	Rhizobium anhuiense CCBAU 23252	56.9	[53.3 - 60.4]	41.7	[39.2 - 44.3]	53.8	[50.7 - 56.9]	0.36
'Rhizobium leguminosarum bv. viciae TOM' (GCF 000372205.1)	'Rhizobium anhuiense' (GCF 003985145.1)	59.3	[55.7 - 62.9]	41.7	[39.2 - 44.3]	55.8	[52.7 - 58.9]	0.29
'Rhizobium leguminosarum bv. trifolii SRDI565' (GCF 000371905.1)	Rhizobium anhuiense CGMCC 1.12621	55.6	[52.1 - 59.1]	41.6	[39.1 - 44.2]	52.8	[49.7 - 55.9]	0.44
'Rhizobium leguminosarum bv. trifolii SRDI565' (GCF 000371905.1)	'Rhizobium anhuiense' (GCF 003985145.1)	55.7	[52.2 - 59.2]	41.6	[39.1 - 44.2]	52.9	[49.8 - 56.0]	0.45
'Rhizobium leguminosarum bv. trifolii SRDI565' (GCF 000371905.1)	Rhizobium anhuiense CCBAU 23252	55.2	[51.6 - 58.6]	41.6	[39.1 - 44.2]	52.4	[49.3 - 55.5]	0.46
'Rhizobium leguminosarum bv. phaseoli FA23' (GCF 000419705.1)	Rhizobium hidalgonense FH14	55.2	[51.6 - 58.6]	38	[35.5 - 40.5]	51.2	[48.1 - 54.3]	0.01
'Rhizobium leguminosarum bv. phaseoli FA23' (GCF 000419705.1)	Rhizobium vallis CCBAU 65647	49.9	[46.5 - 53.4]	37.3	[34.9 - 39.9]	46.8	[43.8 - 49.9]	0.07
'Rhizobium anhuiense' (GCF 003985145.1)	Rhizobium fabae DSM 19331	53.8	[50.3 - 57.2]	36.6	[34.2 - 39.1]	49.6	[46.6 - 52.7]	0.3
'Rhizobium anhuiense' (GCF 003985145.1)	Rhizobium fabae CCBAU 33202	56.7	[53.1 - 60.2]	36.2	[33.7 - 38.7]	51.7	[48.7 - 54.8]	0.05
'Rhizobium anhuiense' (GCF 003985145.1)	Rhizobium hidalgonense FH14	51.1	[47.6 - 54.5]	36.2	[33.8 - 38.7]	47.4	[44.3 - 50.4]	0.29
'Rhizobium anhuiense' (GCF 003985145.1)	Rhizobium pisi DSM 30132	52.7	[49.3 - 56.2]	36.2	[33.7 - 38.7]	48.7	[45.6 - 51.7]	0.15
'Rhizobium leguminosarum bv. viciae USDA 2370' (GCF 002008365.1)	Rhizobium fabae DSM 19331	48.4	[45.0 - 51.9]	36	[33.6 - 38.6]	45.2	[42.2 - 48.3]	0.25
'Rhizobium ruizarguesonis' (GCF 012349115.1)	Rhizobium hidalgonense FH14	50.1	[46.6 - 53.5]	36	[33.6 - 38.5]	46.5	[43.5 - 49.5]	0.09
'Rhizobium leguminosarum' (GCF 004306515.1)	Rhizobium fabae CCBAU 33202	51.5	[48.0 - 54.9]	36	[33.5 - 38.5]	47.6	[44.6 - 50.6]	0.3
'Rhizobium ruizarguesonis' (GCF 012349115.1)	Rhizobium fabae DSM 19331	47.6	[44.2 - 51.1]	36	[33.5 - 38.5]	44.6	[41.6 - 47.6]	0.08
'Rhizobium leguminosarum bv. viciae 248' (GCF 010365265.1)	Rhizobium hidalgonense FH14	48.9	[45.5 - 52.3]	35.9	[33.5 - 38.4]	45.5	[42.5 - 48.5]	0.11
'Rhizobium sp. WYCCWR 11290' (GCF 013426945.1)	Rhizobium hidalgonense FH14	48.7	[45.3 - 52.1]	35.9	[33.4 - 38.4]	45.4	[42.4 - 48.4]	0.04
'Rhizobium leguminosarum' (GCF 004306515.1)	Rhizobium fabae DSM 19331	47.6	[44.2 - 51.0]	35.9	[33.5 - 38.5]	44.5	[41.5 - 47.6]	0.06
'Rhizobium leguminosarum' (GCF 004306515.1)	Rhizobium pisi DSM 30132	48.9	[45.5 - 52.4]	35.9	[33.5 - 38.4]	45.6	[42.6 - 48.6]	0.21
'Rhizobium leguminosarum bv. viciae USDA 2370' (GCF 002008365.1)	Rhizobium hidalgonense FH14	47.3	[43.9 - 50.8]	35.9	[33.4 - 38.4]	44.3	[41.3 - 47.3]	0.26
'Rhizobium leguminosarum' (GCF 004306515.1)	Rhizobium hidalgonense FH14	49.5	[46.1 - 52.9]	35.9	[33.5 - 38.4]	46	[43.0 - 49.1]	0.07
'Rhizobium leguminosarum bv. viciae 3841' (GCF 000009265.1)	Rhizobium hidalgonense FH14	47.3	[43.9 - 50.7]	35.8	[33.3 - 38.3]	44.2	[41.2 - 47.2]	0.02
'Rhizobium laguerreae' (GCF 010668165.1)	Rhizobium hidalgonense FH14	48.9	[45.5 - 52.4]	35.8	[33.4 - 38.3]	45.6	[42.6 - 48.6]	0.06
'Rhizobium ruizarguesonis' (GCF 012349115.1)	Rhizobium fabae CCBAU 33202	52	[48.6 - 55.5]	35.8	[33.4 - 38.4]	48	[45.0 - 51.0]	0.32
'Rhizobium anhuiense' (GCF 003985145.1)	Rhizobium vallis CCBAU 65647	48.1	[44.7 - 51.5]	35.7	[33.3 - 38.3]	44.9	[41.9 - 47.9]	0.35
'Rhizobium sophorae' (GCF 013087515.1)	Rhizobium hidalgonense FH14	47.5	[44.1 - 50.9]	35.7	[33.2 - 38.2]	44.4	[41.4 - 47.4]	0
'Rhizobium leguminosarum bv. viciae USDA 2370' (GCF 002008365.1)	Rhizobium fabae CCBAU 33202	51.1	[47.7 - 54.6]	35.7	[33.2 - 38.2]	47.2	[44.2 - 50.3]	0.49
'Rhizobium leguminosarum' (GCF 001679785.1)	Rhizobium hidalgonense FH14	42.8	[39.5 - 46.3]	35.7	[33.3 - 38.2]	40.6	[37.6 - 43.6]	0.3
'Rhizobium leguminosarum bv. trifolii WSM1325' (GCF 000023185.1)	Rhizobium hidalgonense FH14	47.7	[44.3 - 51.1]	35.7	[33.2 - 38.2]	44.5	[41.5 - 47.6]	0.07
'Rhizobium leguminosarum bv. viciae WSM1455' (GCF 000271805.1)	Rhizobium hidalgonense FH14	48.2	[44.8 - 51.6]	35.7	[33.3 - 38.3]	44.9	[41.9 - 48.0]	0.12
'Rhizobium ruizarguesonis' (GCF 012349115.1)	Rhizobium pisi DSM 30132	49.5	[46.1 - 53.0]	35.7	[33.3 - 38.2]	46	[43.0 - 49.0]	0.23
'Rhizobium indicum' (GCF 005862305.2)	Rhizobium hidalgonense FH14	49.4	[46.0 - 52.9]	35.7	[33.3 - 38.3]	45.9	[42.9 - 49.0]	0.06
'Rhizobium sp. WYCCWR 11290' (GCF 013426945.1)	Rhizobium fabae DSM 19331	45.9	[42.5 - 49.4]	35.6	[33.2 - 38.1]	43.1	[40.1 - 46.1]	0.05
'Rhizobium leguminosarum' (GCF 001652265.1)	Rhizobium fabae DSM 19331	45	[41.7 - 48.5]	35.6	[33.1 - 38.1]	42.4	[39.4 - 45.4]	0.21
'Rhizobium leguminosarum bv. viciae WSM1455' (GCF 000271805.1)	Rhizobium fabae CCBAU 33202	48.2	[44.8 - 51.6]	35.6	[33.1 - 38.1]	44.9	[41.9 - 47.9]	0.11
'Rhizobium leguminosarum bv. viciae WSM1455' (GCF 000271805.1)	Rhizobium fabae DSM 19331	43.9	[40.5 - 47.3]	35.6	[33.2 - 38.1]	41.4	[38.4 - 44.4]	0.13
'Rhizobium leguminosarum' (GCF 001652265.1)	Rhizobium hidalgonense FH14	44.6	[41.2 - 48.0]	35.6	[33.2 - 38.2]	42	[39.0 - 45.0]	0.22
'Rhizobium indicum' (GCF 005862305.2)	Rhizobium fabae DSM 19331	45.7	[42.3 - 49.1]	35.6	[33.2 - 38.1]	42.9	[39.9 - 45.9]	0.05
'Rhizobium leguminosarum bv. viciae USDA 2370' (GCF 002008365.1)	Rhizobium pisi DSM 30132	47.8	[44.4 - 51.2]	35.6	[33.1 - 38.1]	44.6	[41.6 - 47.6]	0.4
'Rhizobium sophorae' (GCF 013087515.1)	Rhizobium pisi DSM 30132	48.6	[45.2 - 52.0]	35.6	[33.1 - 38.1]	45.2	[42.2 - 48.2]	0.14
'Rhizobium leguminosarum bv. trifolii' (GCF 000769405.2)	Rhizobium hidalgonense FH14	49.6	[46.1 - 53.0]	35.6	[33.2 - 38.1]	46	[43.0 - 49.0]	0.04
'Rhizobium leguminosarum' (GCF 001679785.1)	Rhizobium fabae DSM 19331	41.3	[38.0 - 44.8]	35.6	[33.1 - 38.1]	39.3	[36.4 - 42.4]	0.29
'Rhizobium indicum' (GCF 005862305.2)	Rhizobium fabae CCBAU 33202	50.4	[47.0 - 53.8]	35.6	[33.2 - 38.1]	46.6	[43.6 - 49.7]	0.3
'Rhizobium leguminosarum bv. phaseoli FA23' (GCF 000419705.1)	Rhizobium fabae CCBAU 33202	49.7	[46.3 - 53.2]	35.6	[33.1 - 38.1]	46.1	[43.1 - 49.1]	0.23
'Rhizobium indicum' (GCF 005862305.2)	Rhizobium pisi DSM 30132	48.3	[44.9 - 51.7]	35.6	[33.1 - 38.1]	44.9	[41.9 - 48.0]	0.21
'Rhizobium sp. WYCCWR 11290' (GCF 013426945.1)	Rhizobium pisi DSM 30132	46.9	[43.5 - 50.4]	35.5	[33.0 - 38.0]	43.8	[40.9 - 46.9]	0.1
'Rhizobium leguminosarum bv. viciae 3841' (GCF 000009265.1)	Rhizobium fabae DSM 19331	45	[41.7 - 48.5]	35.5	[33.1 - 38.0]	42.3	[39.4 - 45.4]	0.03
'Rhizobium leguminosarum bv. viciae 248' (GCF 010365265.1)	Rhizobium fabae DSM 19331	47.3	[43.9 - 50.7]	35.5	[33.1 - 38.0]	44.1	[41.1 - 47.2]	0.12
'Rhizobium sp. WYCCWR 11290' (GCF 013426945.1)	Rhizobium fabae CCBAU 33202	49.7	[46.3 - 53.1]	35.5	[33.1 - 38.0]	46.1	[43.1 - 49.1]	0.19
'Rhizobium leguminosarum' (GCF 004306515.1)	Rhizobium vallis CCBAU 65647	45.2	[41.8 - 48.6]	35.5	[33.1 - 38.0]	42.5	[39.5 - 45.5]	0
'Rhizobium leguminosarum' (GCF 001652265.1)	Rhizobium fabae CCBAU 33202	48.9	[45.4 - 52.3]	35.5	[33.0 - 38.0]	45.4	[42.4 - 48.4]	0.45
'Rhizobium leguminosarum bv. viciae TOM' (GCF 000372205.1)	Rhizobium hidalgonense FH14	49.1	[45.6 - 52.5]	35.5	[33.1 - 38.0]	45.5	[42.5 - 48.6]	0
'Rhizobium leguminosarum bv. viciae 3841' (GCF 000009265.1)	Rhizobium fabae CCBAU 33202	49.7	[46.3 - 53.1]	35.5	[33.0 - 38.0]	46	[43.0 - 49.1]	0.21
'Rhizobium leguminosarum bv. phaseoli FA23' (GCF 000419705.1)	Rhizobium fabae DSM 19331	44.5	[41.1 - 47.9]	35.4	[33.0 - 38.0]	41.9	[38.9 - 44.9]	0.02
'Rhizobium leguminosarum bv. viciae WSM1455' (GCF 000271805.1)	Rhizobium pisi DSM 30132	44.8	[41.4 - 48.2]	35.4	[33.0 - 37.9]	42.1	[39.1 - 45.1]	0.02
'Rhizobium leguminosarum' (GCF 001679785.1)	Rhizobium fabae CCBAU 33202	44.6	[41.2 - 48.0]	35.4	[33.0 - 37.9]	41.9	[39.0 - 45.0]	0.54
'Rhizobium laguerreae' (GCF 010668165.1)	Rhizobium fabae DSM 19331	47.7	[44.3 - 51.2]	35.4	[33.0 - 37.9]	44.5	[41.5 - 47.5]	0.05
'Rhizobium leguminosarum' (GCF 001652265.1)	Rhizobium pisi DSM 30132	44.7	[41.3 - 48.1]	35.4	[33.0 - 37.9]	42	[39.0 - 45.0]	0.36
'Rhizobium leguminosarum bv. phaseoli FA23' (GCF 000419705.1)	Rhizobium pisi DSM 30132	47.2	[43.8 - 50.7]	35.4	[33.0 - 37.9]	44.1	[41.1 - 47.1]	0.13
'Rhizobium leguminosarum bv. trifolii SRDI565' (GCF 000371905.1)	Rhizobium hidalgonense FH14	49.3	[45.9 - 52.7]	35.4	[33.0 - 38.0]	45.7	[42.7 - 48.7]	0.16
'Rhizobium leguminosarum bv. viciae 248' (GCF 010365265.1)	Rhizobium fabae CCBAU 33202	50.9	[47.4 - 54.3]	35.4	[33.0 - 37.9]	46.9	[43.9 - 50.0]	0.13
'Rhizobium laguerreae' (GCF 010668165.1)	Rhizobium fabae CCBAU 33202	50.7	[47.3 - 54.2]	35.3	[32.8 - 37.8]	46.8	[43.8 - 49.8]	0.29
'Rhizobium leguminosarum bv. trifolii' (GCF 000769405.2)	Rhizobium fabae CCBAU 33202	51.2	[47.8 - 54.7]	35.3	[32.9 - 37.8]	47.2	[44.2 - 50.2]	0.2
'Rhizobium leguminosarum bv. trifolii SRDI565' (GCF 000371905.1)	Rhizobium pisi DSM 30132	50.2	[46.8 - 53.7]	35.3	[32.8 - 37.8]	46.4	[43.4 - 49.4]	0.31
'Rhizobium sophorae' (GCF 013087515.1)	Rhizobium fabae CCBAU 33202	50.3	[46.8 - 53.7]	35.3	[32.8 - 37.8]	46.4	[43.4 - 49.4]	0.24
'Rhizobium leguminosarum bv. viciae 248' (GCF 010365265.1)	Rhizobium pisi DSM 30132	48.1	[44.7 - 51.5]	35.3	[32.8 - 37.8]	44.7	[41.7 - 47.7]	0.04
'Rhizobium leguminosarum bv. viciae 3841' (GCF 000009265.1)	Rhizobium pisi DSM 30132	46	[42.6 - 49.4]	35.3	[32.8 - 37.8]	43	[40.0 - 46.0]	0.12
'Rhizobium leguminosarum' (GCF 001679785.1)	Rhizobium pisi DSM 30132	40.9	[37.5 - 44.3]	35.3	[32.9 - 37.8]	38.9	[35.9 - 41.9]	0.45
'Rhizobium laguerreae' (GCF 002008165.1)	Rhizobium hidalgonense FH14	49.3	[45.9 - 52.8]	35.3	[32.9 - 37.8]	45.7	[42.7 - 48.7]	0.06
'Rhizobium leguminosarum bv. viciae TOM' (GCF 000372205.1)	Rhizobium fabae DSM 19331	46.3	[42.9 - 49.7]	35.3	[32.9 - 37.8]	43.3	[40.3 - 46.3]	0.01
'Rhizobium leguminosarum bv. trifolii' (GCF 000769405.2)	Rhizobium fabae DSM 19331	46.3	[43.0 - 49.8]	35.3	[32.8 - 37.8]	43.3	[40.3 - 46.3]	0.05
'Rhizobium leguminosarum bv. trifolii WSM1325' (GCF 000023185.1)	Rhizobium fabae CCBAU 33202	49.3	[45.9 - 52.8]	35.2	[32.8 - 37.7]	45.7	[42.7 - 48.7]	0.3
'Rhizobium leguminosarum' (GCF 001652265.1)	Rhizobium vallis CCBAU 65647	42.3	[39.0 - 45.8]	35.2	[32.8 - 37.7]	40.1	[37.1 - 43.1]	0.15
'Rhizobium laguerreae' (GCF 002008165.1)	Rhizobium fabae DSM 19331	44.8	[41.5 - 48.3]	35.2	[32.7 - 37.7]	42.1	[39.1 - 45.1]	0.05
'Rhizobium laguerreae' (GCF 010668165.1)	Rhizobium pisi DSM 30132	47.9	[44.5 - 51.3]	35.2	[32.7 - 37.7]	44.5	[41.5 - 47.6]	0.2
'Rhizobium ruizarguesonis' (GCF 012349115.1)	Rhizobium vallis CCBAU 65647	45.5	[42.1 - 48.9]	35.2	[32.8 - 37.8]	42.6	[39.6 - 45.7]	0.02
'Rhizobium leguminosarum bv. viciae USDA 2370' (GCF 002008365.1)	Rhizobium vallis CCBAU 65647	44.9	[41.5 - 48.3]	35.2	[32.7 - 37.7]	42.1	[39.2 - 45.2]	0.19
'Rhizobium leguminosarum bv. viciae TOM' (GCF 000372205.1)	Rhizobium fabae CCBAU 33202	50.2	[46.8 - 53.6]	35.2	[32.8 - 37.7]	46.3	[43.3 - 49.4]	0.24
'Rhizobium sp. WYCCWR 11290' (GCF 013426945.1)	Rhizobium vallis CCBAU 65647	44.1	[40.7 - 47.5]	35.2	[32.7 - 37.7]	41.5	[38.5 - 44.5]	0.11
'Rhizobium leguminosarum bv. trifolii' (GCF 000769405.2)	Rhizobium pisi DSM 30132	48.9	[45.5 - 52.3]	35.2	[32.8 - 37.7]	45.3	[42.3 - 48.4]	0.11
'Rhizobium sophorae' (GCF 013087515.1)	Rhizobium fabae DSM 19331	45.6	[42.2 - 49.0]	35.1	[32.7 - 37.6]	42.7	[39.7 - 45.7]	0.01
'Rhizobium laguerreae' (GCF 002008165.1)	Rhizobium fabae CCBAU 33202	48.9	[45.5 - 52.3]	35.1	[32.7 - 37.6]	45.3	[42.3 - 48.3]	0.29
'Rhizobium leguminosarum bv. trifolii SRDI565' (GCF 000371905.1)	Rhizobium fabae DSM 19331	46.5	[43.1 - 49.9]	35.1	[32.6 - 37.6]	43.4	[40.4 - 46.4]	0.15
'Rhizobium leguminosarum bv. trifolii SRDI565' (GCF 000371905.1)	Rhizobium fabae CCBAU 33202	51	[47.6 - 54.4]	35.1	[32.7 - 37.6]	46.9	[43.9 - 50.0]	0.4
'Rhizobium leguminosarum bv. trifolii WSM1325' (GCF 000023185.1)	Rhizobium fabae DSM 19331	44.7	[41.3 - 48.1]	35.1	[32.7 - 37.6]	42	[39.0 - 45.0]	0.06
'Rhizobium indicum' (GCF 005862305.2)	Rhizobium vallis CCBAU 65647	44.8	[41.4 - 48.2]	35.1	[32.7 - 37.6]	42	[39.0 - 45.0]	0
'Rhizobium leguminosarum bv. viciae WSM1455' (GCF 000271805.1)	Rhizobium vallis CCBAU 65647	43.1	[39.8 - 46.6]	35	[32.5 - 37.5]	40.6	[37.7 - 43.7]	0.19
'Rhizobium leguminosarum bv. trifolii WSM1325' (GCF 000023185.1)	Rhizobium pisi DSM 30132	46.6	[43.2 - 50.0]	35	[32.6 - 37.5]	43.4	[40.4 - 46.4]	0.21
'Rhizobium leguminosarum bv. viciae TOM' (GCF 000372205.1)	Rhizobium pisi DSM 30132	47.9	[44.5 - 51.3]	35	[32.6 - 37.6]	44.5	[41.5 - 47.5]	0.15
'Rhizobium leguminosarum bv. viciae 3841' (GCF 000009265.1)	Rhizobium vallis CCBAU 65647	44.5	[41.2 - 48.0]	35	[32.6 - 37.5]	41.8	[38.8 - 44.8]	0.09
'Rhizobium leguminosarum bv. viciae 248' (GCF 010365265.1)	Rhizobium vallis CCBAU 65647	44.4	[41.0 - 47.8]	35	[32.6 - 37.5]	41.7	[38.7 - 44.7]	0.17
'Rhizobium laguerreae' (GCF 010668165.1)	Rhizobium vallis CCBAU 65647	43.9	[40.5 - 47.3]	35	[32.6 - 37.6]	41.3	[38.3 - 44.3]	0.01
'Rhizobium laguerreae' (GCF 002008165.1)	Rhizobium pisi DSM 30132	46.5	[43.2 - 50.0]	35	[32.6 - 37.5]	43.4	[40.4 - 46.4]	0.2
'Rhizobium leguminosarum bv. trifolii' (GCF 000769405.2)	Rhizobium vallis CCBAU 65647	45.7	[42.3 - 49.2]	35	[32.6 - 37.5]	42.7	[39.8 - 45.8]	0.1
'Rhizobium leguminosarum bv. trifolii WSM1325' (GCF 000023185.1)	Rhizobium vallis CCBAU 65647	43.4	[40.0 - 46.8]	34.9	[32.5 - 37.4]	40.8	[37.9 - 43.9]	0
'Rhizobium leguminosarum' (GCF 001679785.1)	Rhizobium vallis CCBAU 65647	41	[37.7 - 44.5]	34.8	[32.3 - 37.3]	38.9	[35.9 - 41.9]	0.24
'Rhizobium leguminosarum bv. viciae TOM' (GCF 000372205.1)	Rhizobium vallis CCBAU 65647	44	[40.6 - 47.4]	34.8	[32.3 - 37.3]	41.3	[38.3 - 44.3]	0.06
'Rhizobium leguminosarum bv. trifolii SRDI565' (GCF 000371905.1)	Rhizobium vallis CCBAU 65647	44.6	[41.2 - 48.0]	34.8	[32.4 - 37.3]	41.8	[38.8 - 44.8]	0.1
'Rhizobium sophorae' (GCF 013087515.1)	Rhizobium vallis CCBAU 65647	44.5	[41.1 - 47.9]	34.8	[32.4 - 37.3]	41.7	[38.7 - 44.7]	0.06
'Rhizobium laguerreae' (GCF 002008165.1)	Rhizobium vallis CCBAU 65647	44.2	[40.8 - 47.6]	34.6	[32.1 - 37.1]	41.4	[38.4 - 44.4]	0
'Rhizobium sophorae' (GCF 013087515.1)	Rhizobium esperanzae CNPSo 668	47	[43.6 - 50.4]	33.8	[31.3 - 36.3]	43.3	[40.3 - 46.4]	0.22
'Rhizobium leguminosarum bv. phaseoli FA23' (GCF 000419705.1)	Rhizobium esperanzae CNPSo 668	46.3	[42.9 - 49.7]	33.7	[31.3 - 36.2]	42.8	[39.8 - 45.8]	0.21
'Rhizobium leguminosarum' (GCF 004306515.1)	Rhizobium esperanzae CNPSo 668	43.9	[40.5 - 47.3]	33.2	[30.8 - 35.7]	40.7	[37.8 - 43.8]	0.29
'Rhizobium anhuiense' (GCF 003985145.1)	Rhizobium esperanzae CNPSo 668	48.1	[44.7 - 51.5]	33.2	[30.8 - 35.7]	44	[41.0 - 47.0]	0.07
'Rhizobium leguminosarum bv. viciae WSM1455' (GCF 000271805.1)	Rhizobium esperanzae CNPSo 668	44.1	[40.7 - 47.5]	33.1	[30.6 - 35.6]	40.8	[37.9 - 43.9]	0.1
'Rhizobium ruizarguesonis' (GCF 012349115.1)	Rhizobium esperanzae CNPSo 668	44.4	[41.1 - 47.9]	33.1	[30.7 - 35.6]	41.1	[38.2 - 44.2]	0.31
'Rhizobium laguerreae' (GCF 010668165.1)	Rhizobium esperanzae CNPSo 668	45.9	[42.5 - 49.3]	33	[30.6 - 35.5]	42.2	[39.3 - 45.3]	0.28
'Rhizobium sp. WYCCWR 11290' (GCF 013426945.1)	Rhizobium esperanzae CNPSo 668	46.1	[42.7 - 49.5]	33	[30.6 - 35.5]	42.4	[39.4 - 45.4]	0.18
'Rhizobium leguminosarum bv. viciae TOM' (GCF 000372205.1)	Rhizobium esperanzae CNPSo 668	45.1	[41.8 - 48.6]	33	[30.6 - 35.5]	41.7	[38.7 - 44.7]	0.22
'Rhizobium leguminosarum' (GCF 001652265.1)	Rhizobium esperanzae CNPSo 668	40.7	[37.3 - 44.1]	33	[30.6 - 35.5]	38.1	[35.2 - 41.2]	0.44
'Rhizobium leguminosarum bv. viciae USDA 2370' (GCF 002008365.1)	Rhizobium esperanzae CNPSo 668	43	[39.7 - 46.5]	33	[30.6 - 35.5]	40	[37.0 - 43.0]	0.48
'Rhizobium indicum' (GCF 005862305.2)	Rhizobium esperanzae CNPSo 668	44.2	[40.8 - 47.6]	33	[30.6 - 35.5]	40.9	[38.0 - 44.0]	0.28
'Rhizobium leguminosarum' (GCF 001679785.1)	Rhizobium esperanzae CNPSo 668	40.5	[37.1 - 43.9]	32.9	[30.4 - 35.4]	37.9	[35.0 - 41.0]	0.52
'Rhizobium leguminosarum bv. viciae 3841' (GCF 000009265.1)	Rhizobium esperanzae CNPSo 668	43.2	[39.9 - 46.7]	32.9	[30.5 - 35.4]	40.1	[37.2 - 43.2]	0.2
'Rhizobium leguminosarum bv. trifolii WSM1325' (GCF 000023185.1)	Rhizobium esperanzae CNPSo 668	43.8	[40.4 - 47.3]	32.8	[30.4 - 35.3]	40.6	[37.6 - 43.6]	0.29
'Rhizobium leguminosarum bv. viciae 248' (GCF 010365265.1)	Rhizobium esperanzae CNPSo 668	47.4	[44.0 - 50.8]	32.8	[30.4 - 35.3]	43.3	[40.4 - 46.4]	0.12
'Rhizobium leguminosarum bv. trifolii SRDI565' (GCF 000371905.1)	Rhizobium esperanzae CNPSo 668	46.6	[43.2 - 50.1]	32.8	[30.4 - 35.3]	42.7	[39.8 - 45.8]	0.39
'Rhizobium laguerreae' (GCF 002008165.1)	Rhizobium esperanzae CNPSo 668	44.8	[41.4 - 48.2]	32.7	[30.3 - 35.2]	41.3	[38.3 - 44.3]	0.28
'Rhizobium leguminosarum bv. trifolii' (GCF 000769405.2)	Rhizobium esperanzae CNPSo 668	45.3	[41.9 - 48.7]	32.7	[30.3 - 35.2]	41.7	[38.7 - 44.7]	0.18

## Sheet: Table S8
Potential new species detected: your strain 'Rhizobium leguminosarum bv. trifolii CC278f' (GCF_000517045.1) does not belong to any species found in TYGS database.
Potential new species detected: your strain 'Rhizobium leguminosarum bv. trifolii WSM1689' (GCF_000517605.1) does not belong to any species found in TYGS database.
Potential new species detected: your strain 'Rhizobium leguminosarum' (GCF_001612535.1) does not belong to any species found in TYGS database.
Potential new species detected: your strain 'Rhizobium sp. WYCCWR10014' (GCF_001657485.1) does not belong to any species found in TYGS database.
Potential new species detected: your strain 'Rhizobium leguminosarum' (GCF_002953715.1) does not belong to any species found in TYGS database.
Potential new species detected: your strain 'Rhizobium leguminosarum' (GCF_004123835.1) does not belong to any species found in TYGS database.
Potential new species detected: your strain 'Rhizobium laguerreae' (GCF_012276585.1) does not belong to any species found in TYGS database.
Type Strain Genome Server
Query strain	Subject strain	dDDH (d0, in %)	C.I. (d0, in %)	dDDH (d4, in %)	C.I. (d4, in %)	dDDH (d6, in %)	C.I. (d6, in %)	G+C content difference (in %)
'Rhizobium laguerreae' (GCF 012276585.1)	Rhizobium laguerreae FB206	79.4	[75.5 - 82.9]	69.8	[66.8 - 72.6]	80.5	[77.1 - 83.5]	0.08
'Rhizobium leguminosarum bv. trifolii WSM1689' (GCF 000517605.1)	Rhizobium laguerreae FB206	55.4	[51.8 - 58.9]	65.8	[62.9 - 68.6]	58.1	[54.9 - 61.2]	0.32
'Rhizobium leguminosarum bv. trifolii CC278f' (GCF 000517045.1)	'Rhizobium leguminosarum' (GCF 002953715.1)	70.7	[66.7 - 74.3]	65.8	[62.8 - 68.6]	72.1	[68.6 - 75.3]	0.07
'Rhizobium leguminosarum bv. trifolii WSM1689' (GCF 000517605.1)	'Rhizobium laguerreae' (GCF 012276585.1)	54.6	[51.1 - 58.1]	63.9	[61.0 - 66.8]	57	[53.8 - 60.1]	0.24
'Rhizobium leguminosarum' (GCF 001612535.1)	Rhizobium indicum MCC 3961T	68.6	[64.7 - 72.3]	61.4	[58.5 - 64.1]	69.3	[65.8 - 72.5]	0.04
'Rhizobium leguminosarum bv. trifolii CC278f' (GCF 000517045.1)	Rhizobium leguminosarum USDA 2370	66.2	[62.3 - 69.8]	60.9	[58.1 - 63.7]	67	[63.6 - 70.2]	0.01
'Rhizobium leguminosarum bv. trifolii CC278f' (GCF 000517045.1)	Rhizobium leguminosarum DSM 106839	65.9	[62.1 - 69.6]	60.9	[58.1 - 63.7]	66.8	[63.4 - 70.0]	0.01
'Rhizobium leguminosarum bv. trifolii CC278f' (GCF 000517045.1)	Rhizobium trifolii DSM 30141	65.1	[61.3 - 68.7]	59.4	[56.6 - 62.2]	65.7	[62.4 - 69.0]	0.02
'Rhizobium leguminosarum bv. trifolii WSM1689' (GCF 000517605.1)	'Rhizobium leguminosarum' (GCF 001612535.1)	47.8	[44.4 - 51.3]	58.9	[56.1 - 61.6]	49.7	[46.7 - 52.8]	0.37
'Rhizobium leguminosarum' (GCF 002953715.1)	Rhizobium leguminosarum DSM 106839	66.4	[62.5 - 70.0]	58.7	[55.9 - 61.4]	66.7	[63.3 - 69.9]	0.06
'Rhizobium leguminosarum' (GCF 002953715.1)	Rhizobium leguminosarum USDA 2370	66.7	[62.9 - 70.4]	58.7	[55.9 - 61.4]	67	[63.6 - 70.2]	0.06
'Rhizobium leguminosarum' (GCF 004123835.1)	Rhizobium indicum MCC 3961T	72	[68.0 - 75.6]	58.5	[55.7 - 61.2]	71.5	[68.0 - 74.7]	0.32
'Rhizobium leguminosarum' (GCF 001612535.1)	'Rhizobium laguerreae' (GCF 012276585.1)	66.1	[62.3 - 69.7]	58.3	[55.5 - 61.0]	66.3	[62.9 - 69.6]	0.13
'Rhizobium leguminosarum' (GCF 002953715.1)	Rhizobium trifolii DSM 30141	63.1	[59.3 - 66.7]	58	[55.2 - 60.8]	63.6	[60.3 - 66.8]	0.09
'Rhizobium leguminosarum' (GCF 001612535.1)	Rhizobium laguerreae FB206	63	[59.2 - 66.6]	57.7	[54.9 - 60.4]	63.4	[60.1 - 66.6]	0.05
'Rhizobium leguminosarum' (GCF 001612535.1)	'Rhizobium leguminosarum' (GCF 004123835.1)	67.9	[64.1 - 71.6]	57.2	[54.4 - 59.9]	67.7	[64.2 - 70.9]	0.37
'Rhizobium leguminosarum' (GCF 001612535.1)	'Rhizobium sp. WYCCWR10014' (GCF 001657485.1)	65.3	[61.5 - 68.9]	56.4	[53.7 - 59.2]	65.2	[61.8 - 68.4]	0.08
'Rhizobium leguminosarum' (GCF 004123835.1)	Rhizobium sophorae CCBAU 03386	67.1	[63.2 - 70.7]	56.4	[53.7 - 59.1]	66.7	[63.3 - 70.0]	0.25
'Rhizobium sp. WYCCWR10014' (GCF 001657485.1)	Rhizobium indicum MCC 3961T	72.6	[68.6 - 76.2]	56	[53.3 - 58.8]	71.3	[67.8 - 74.5]	0.04
'Rhizobium leguminosarum bv. trifolii WSM1689' (GCF 000517605.1)	Rhizobium indicum MCC 3961T	49.7	[46.3 - 53.1]	56	[53.2 - 58.7]	51	[47.9 - 54.1]	0.32
'Rhizobium sp. WYCCWR10014' (GCF 001657485.1)	'Rhizobium leguminosarum' (GCF 004123835.1)	67.2	[63.4 - 70.9]	55.7	[53.0 - 58.4]	66.7	[63.3 - 69.9]	0.28
'Rhizobium laguerreae' (GCF 012276585.1)	Rhizobium indicum MCC 3961T	69.4	[65.5 - 73.1]	55.2	[52.4 - 57.9]	68.4	[65.0 - 71.6]	0.08
'Rhizobium leguminosarum' (GCF 002953715.1)	Rhizobium ruizarguesonis UPM1133T	68.7	[64.8 - 72.3]	55.2	[52.4 - 57.9]	67.8	[64.4 - 71.0]	0.12
'Rhizobium leguminosarum bv. trifolii WSM1689' (GCF 000517605.1)	'Rhizobium leguminosarum' (GCF 004123835.1)	52.5	[49.0 - 55.9]	54.7	[52.0 - 57.4]	53.3	[50.2 - 56.4]	0
'Rhizobium leguminosarum' (GCF 004123835.1)	Rhizobium laguerreae FB206	66.1	[62.3 - 69.7]	54.2	[51.5 - 56.9]	65.3	[61.9 - 68.5]	0.32
'Rhizobium leguminosarum bv. trifolii CC278f' (GCF 000517045.1)	'Rhizobium sp. WYCCWR10014' (GCF 001657485.1)	63.6	[59.9 - 67.3]	54.2	[51.5 - 56.9]	63.2	[59.8 - 66.4]	0.25
'Rhizobium leguminosarum' (GCF 004123835.1)	'Rhizobium laguerreae' (GCF 012276585.1)	67.1	[63.3 - 70.8]	54.1	[51.4 - 56.8]	66.2	[62.8 - 69.4]	0.24
'Rhizobium leguminosarum' (GCF 001612535.1)	Rhizobium sophorae CCBAU 03386	61.5	[57.8 - 65.1]	54.1	[51.4 - 56.8]	61.3	[58.0 - 64.4]	0.11
'Rhizobium leguminosarum bv. trifolii WSM1689' (GCF 000517605.1)	'Rhizobium sp. WYCCWR10014' (GCF 001657485.1)	48.7	[45.3 - 52.2]	53.7	[51.0 - 56.4]	49.7	[46.6 - 52.8]	0.29
'Rhizobium leguminosarum bv. trifolii WSM1689' (GCF 000517605.1)	Rhizobium sophorae CCBAU 03386	47.5	[44.1 - 50.9]	53.1	[50.4 - 55.8]	48.4	[45.4 - 51.5]	0.26
'Rhizobium leguminosarum' (GCF 001612535.1)	Rhizobium ruizarguesonis UPM1133T	62.7	[59.0 - 66.3]	53	[50.3 - 55.7]	62	[58.7 - 65.2]	0.03
'Rhizobium sp. WYCCWR10014' (GCF 001657485.1)	'Rhizobium laguerreae' (GCF 012276585.1)	65.4	[61.6 - 69.1]	52.9	[50.2 - 55.6]	64.4	[61.0 - 67.6]	0.04
'Rhizobium leguminosarum' (GCF 001612535.1)	'Rhizobium leguminosarum' (GCF 002953715.1)	63	[59.2 - 66.6]	52.9	[50.2 - 55.6]	62.2	[58.9 - 65.4]	0.09
'Rhizobium sp. WYCCWR10014' (GCF 001657485.1)	'Rhizobium leguminosarum' (GCF 002953715.1)	62.9	[59.2 - 66.5]	52.8	[50.1 - 55.5]	62.2	[58.9 - 65.4]	0.17
'Rhizobium leguminosarum bv. trifolii CC278f' (GCF 000517045.1)	Rhizobium ruizarguesonis UPM1133T	61.6	[57.9 - 65.2]	52.8	[50.1 - 55.4]	61	[57.8 - 64.2]	0.19
'Rhizobium sp. WYCCWR10014' (GCF 001657485.1)	Rhizobium sophorae CCBAU 03386	67.1	[63.2 - 70.7]	52.6	[49.9 - 55.3]	65.7	[62.3 - 68.9]	0.03
'Rhizobium laguerreae' (GCF 012276585.1)	Rhizobium sophorae CCBAU 03386	64.2	[60.4 - 67.8]	52.5	[49.8 - 55.2]	63.2	[59.9 - 66.4]	0.02
'Rhizobium sp. WYCCWR10014' (GCF 001657485.1)	Rhizobium laguerreae FB206	64.3	[60.5 - 67.9]	52.5	[49.8 - 55.1]	63.2	[59.9 - 66.4]	0.04
'Rhizobium sp. WYCCWR10014' (GCF 001657485.1)	Rhizobium leguminosarum USDA 2370	63.8	[60.1 - 67.4]	52.4	[49.7 - 55.1]	62.9	[59.5 - 66.1]	0.23
'Rhizobium sp. WYCCWR10014' (GCF 001657485.1)	Rhizobium leguminosarum DSM 106839	63.5	[59.7 - 67.1]	52.4	[49.7 - 55.1]	62.6	[59.3 - 65.8]	0.23
'Rhizobium leguminosarum' (GCF 002953715.1)	Rhizobium indicum MCC 3961T	62.6	[58.9 - 66.2]	52.1	[49.4 - 54.7]	61.7	[58.4 - 64.9]	0.13
'Rhizobium sp. WYCCWR10014' (GCF 001657485.1)	Rhizobium trifolii DSM 30141	64.4	[60.6 - 68.0]	52	[49.3 - 54.6]	63.2	[59.9 - 66.4]	0.26
'Rhizobium leguminosarum' (GCF 002953715.1)	'Rhizobium leguminosarum' (GCF 004123835.1)	60.6	[56.9 - 64.1]	51.6	[49.0 - 54.3]	59.8	[56.6 - 63.0]	0.46
'Rhizobium leguminosarum bv. trifolii CC278f' (GCF 000517045.1)	'Rhizobium leguminosarum' (GCF 001612535.1)	57.8	[54.2 - 61.3]	51.3	[48.6 - 53.9]	57.3	[54.1 - 60.5]	0.16
'Rhizobium leguminosarum bv. trifolii CC278f' (GCF 000517045.1)	'Rhizobium leguminosarum' (GCF 004123835.1)	59.2	[55.6 - 62.7]	51	[48.3 - 53.6]	58.5	[55.2 - 61.6]	0.53
'Rhizobium leguminosarum bv. trifolii CC278f' (GCF 000517045.1)	Rhizobium indicum MCC 3961T	60.7	[57.0 - 64.2]	51	[48.4 - 53.7]	59.8	[56.5 - 62.9]	0.21
'Rhizobium sp. WYCCWR10014' (GCF 001657485.1)	Rhizobium ruizarguesonis UPM1133T	65	[61.2 - 68.6]	50.7	[48.0 - 53.3]	63.4	[60.0 - 66.6]	0.06
'Rhizobium leguminosarum' (GCF 004123835.1)	Rhizobium ruizarguesonis UPM1133T	61.7	[58.0 - 65.3]	50.6	[47.9 - 53.2]	60.5	[57.3 - 63.7]	0.34
'Rhizobium leguminosarum' (GCF 001612535.1)	Rhizobium leguminosarum DSM 106839	61	[57.3 - 64.6]	50.2	[47.6 - 52.9]	59.8	[56.6 - 63.0]	0.15
'Rhizobium leguminosarum' (GCF 001612535.1)	Rhizobium leguminosarum USDA 2370	61.3	[57.6 - 64.9]	50.2	[47.6 - 52.8]	60.1	[56.8 - 63.3]	0.15
'Rhizobium leguminosarum' (GCF 001612535.1)	Rhizobium trifolii DSM 30141	58.1	[54.5 - 61.6]	50.1	[47.5 - 52.7]	57.3	[54.1 - 60.4]	0.18
'Rhizobium leguminosarum bv. trifolii WSM1689' (GCF 000517605.1)	'Rhizobium leguminosarum' (GCF 002953715.1)	44.5	[41.1 - 47.9]	50	[47.4 - 52.6]	45.1	[42.1 - 48.1]	0.46
'Rhizobium leguminosarum' (GCF 004123835.1)	Rhizobium trifolii DSM 30141	59.3	[55.7 - 62.8]	49.8	[47.2 - 52.4]	58.3	[55.0 - 61.4]	0.55
'Rhizobium leguminosarum bv. trifolii WSM1689' (GCF 000517605.1)	Rhizobium ruizarguesonis UPM1133T	46.8	[43.4 - 50.2]	49.8	[47.2 - 52.5]	47.2	[44.2 - 50.2]	0.34
'Rhizobium leguminosarum' (GCF 004123835.1)	Rhizobium leguminosarum DSM 106839	57.7	[54.1 - 61.2]	49.7	[47.0 - 52.3]	56.8	[53.6 - 60.0]	0.51
'Rhizobium laguerreae' (GCF 012276585.1)	Rhizobium ruizarguesonis UPM1133T	61.9	[58.2 - 65.5]	49.7	[47.0 - 52.3]	60.5	[57.2 - 63.6]	0.1
'Rhizobium leguminosarum' (GCF 004123835.1)	Rhizobium leguminosarum USDA 2370	58	[54.4 - 61.5]	49.6	[47.0 - 52.3]	57.1	[53.9 - 60.2]	0.51
'Rhizobium leguminosarum' (GCF 002953715.1)	Rhizobium sophorae CCBAU 03386	57.8	[54.2 - 61.3]	49.4	[46.8 - 52.0]	56.8	[53.7 - 60.0]	0.2
'Rhizobium leguminosarum bv. trifolii CC278f' (GCF 000517045.1)	'Rhizobium leguminosarum bv. trifolii WSM1689' (GCF 000517605.1)	40	[36.6 - 43.4]	49.4	[46.8 - 52.1]	40.8	[37.8 - 43.8]	0.53
'Rhizobium leguminosarum' (GCF 002953715.1)	Rhizobium laguerreae FB206	57	[53.5 - 60.6]	49.3	[46.6 - 51.9]	56.2	[53.0 - 59.3]	0.14
'Rhizobium leguminosarum' (GCF 002953715.1)	'Rhizobium laguerreae' (GCF 012276585.1)	58.7	[55.1 - 62.2]	49.2	[46.6 - 51.8]	57.6	[54.4 - 60.7]	0.22
'Rhizobium leguminosarum bv. trifolii CC278f' (GCF 000517045.1)	Rhizobium sophorae CCBAU 03386	56.9	[53.3 - 60.4]	48.9	[46.3 - 51.5]	55.9	[52.8 - 59.1]	0.27
'Rhizobium leguminosarum bv. trifolii CC278f' (GCF 000517045.1)	Rhizobium laguerreae FB206	53.8	[50.3 - 57.2]	48.5	[45.9 - 51.1]	53.1	[50.0 - 56.2]	0.21
'Rhizobium leguminosarum bv. trifolii CC278f' (GCF 000517045.1)	'Rhizobium laguerreae' (GCF 012276585.1)	55.7	[52.2 - 59.2]	48.5	[45.9 - 51.1]	54.8	[51.7 - 57.9]	0.29
'Rhizobium leguminosarum bv. trifolii WSM1689' (GCF 000517605.1)	Rhizobium trifolii DSM 30141	44.8	[41.4 - 48.2]	48.4	[45.8 - 51.0]	45.1	[42.1 - 48.1]	0.55
'Rhizobium leguminosarum bv. trifolii WSM1689' (GCF 000517605.1)	Rhizobium leguminosarum DSM 106839	43.2	[39.9 - 46.7]	48.2	[45.6 - 50.8]	43.6	[40.6 - 46.6]	0.52
'Rhizobium leguminosarum bv. trifolii WSM1689' (GCF 000517605.1)	Rhizobium leguminosarum USDA 2370	43.4	[40.0 - 46.8]	48.2	[45.6 - 50.8]	43.8	[40.8 - 46.8]	0.52
'Rhizobium laguerreae' (GCF 012276585.1)	Rhizobium leguminosarum USDA 2370	58.9	[55.3 - 62.5]	47.4	[44.8 - 50.0]	57.3	[54.1 - 60.4]	0.28
'Rhizobium laguerreae' (GCF 012276585.1)	Rhizobium leguminosarum DSM 106839	58.7	[55.1 - 62.2]	47.4	[44.8 - 50.0]	57.1	[53.9 - 60.2]	0.28
'Rhizobium laguerreae' (GCF 012276585.1)	Rhizobium trifolii DSM 30141	57	[53.4 - 60.5]	47.3	[44.7 - 49.9]	55.6	[52.5 - 58.7]	0.31
'Rhizobium leguminosarum' (GCF 002953715.1)	Rhizobium anhuiense CCBAU 23252	63.9	[60.1 - 67.5]	44	[41.5 - 46.6]	60.4	[57.1 - 63.5]	0.49
'Rhizobium leguminosarum' (GCF 002953715.1)	Rhizobium anhuiense CGMCC 1.12621	61.9	[58.2 - 65.5]	44	[41.5 - 46.6]	58.7	[55.5 - 61.9]	0.47
'Rhizobium leguminosarum bv. trifolii CC278f' (GCF 000517045.1)	Rhizobium anhuiense CCBAU 23252	61.1	[57.4 - 64.7]	43.7	[41.2 - 46.3]	58	[54.8 - 61.1]	0.56
'Rhizobium leguminosarum bv. trifolii CC278f' (GCF 000517045.1)	Rhizobium anhuiense CGMCC 1.12621	59	[55.3 - 62.5]	43.7	[41.1 - 46.2]	56.2	[53.0 - 59.3]	0.54
'Rhizobium leguminosarum' (GCF 004123835.1)	Rhizobium anhuiense CCBAU 23252	59.3	[55.7 - 62.9]	43.3	[40.7 - 45.8]	56.4	[53.2 - 59.5]	0.04
'Rhizobium leguminosarum' (GCF 004123835.1)	Rhizobium anhuiense CGMCC 1.12621	59.7	[56.1 - 63.3]	43.2	[40.7 - 45.8]	56.7	[53.5 - 59.8]	0.02
'Rhizobium leguminosarum' (GCF 001612535.1)	Rhizobium anhuiense CGMCC 1.12621	58	[54.4 - 61.5]	43	[40.5 - 45.5]	55.2	[52.0 - 58.3]	0.38
'Rhizobium leguminosarum' (GCF 001612535.1)	Rhizobium anhuiense CCBAU 23252	59.5	[55.9 - 63.1]	43	[40.5 - 45.5]	56.4	[53.3 - 59.5]	0.4
'Rhizobium sp. WYCCWR10014' (GCF 001657485.1)	Rhizobium anhuiense CCBAU 23252	60.5	[56.8 - 64.0]	42.5	[40.0 - 45.0]	57	[53.8 - 60.2]	0.32
'Rhizobium sp. WYCCWR10014' (GCF 001657485.1)	Rhizobium anhuiense CGMCC 1.12621	59.4	[55.8 - 63.0]	42.5	[40.0 - 45.0]	56.2	[53.0 - 59.3]	0.3
'Rhizobium leguminosarum bv. trifolii WSM1689' (GCF 000517605.1)	Rhizobium anhuiense CCBAU 23252	41.6	[38.2 - 45.1]	42.1	[39.6 - 44.6]	41	[38.0 - 44.0]	0.03
'Rhizobium leguminosarum bv. trifolii WSM1689' (GCF 000517605.1)	Rhizobium anhuiense CGMCC 1.12621	45.9	[42.5 - 49.3]	42.1	[39.6 - 44.6]	44.8	[41.8 - 47.8]	0.01
'Rhizobium laguerreae' (GCF 012276585.1)	Rhizobium anhuiense CGMCC 1.12621	56.8	[53.2 - 60.3]	41.8	[39.3 - 44.4]	53.8	[50.7 - 56.9]	0.25
'Rhizobium laguerreae' (GCF 012276585.1)	Rhizobium anhuiense CCBAU 23252	57.6	[54.0 - 61.2]	41.8	[39.3 - 44.4]	54.5	[51.4 - 57.6]	0.27
'Rhizobium leguminosarum bv. trifolii WSM1689' (GCF 000517605.1)	Rhizobium hidalgonense FH14	41.5	[38.1 - 44.9]	36.4	[33.9 - 38.9]	39.7	[36.7 - 42.7]	0.26
'Rhizobium leguminosarum' (GCF 002953715.1)	Rhizobium hidalgonense FH14	47.3	[43.9 - 50.7]	36.2	[33.8 - 38.7]	44.3	[41.3 - 47.4]	0.2
'Rhizobium leguminosarum' (GCF 004123835.1)	Rhizobium hidalgonense FH14	50.3	[46.8 - 53.7]	36	[33.6 - 38.6]	46.7	[43.7 - 49.7]	0.26
'Rhizobium leguminosarum' (GCF 001612535.1)	Rhizobium hidalgonense FH14	46.8	[43.4 - 50.2]	36	[33.6 - 38.5]	43.9	[40.9 - 46.9]	0.11
'Rhizobium leguminosarum' (GCF 004123835.1)	Rhizobium fabae CCBAU 33202	50.4	[46.9 - 53.8]	35.9	[33.5 - 38.4]	46.7	[43.7 - 49.7]	0.02
'Rhizobium leguminosarum bv. trifolii CC278f' (GCF 000517045.1)	Rhizobium hidalgonense FH14	44.8	[41.5 - 48.3]	35.9	[33.4 - 38.4]	42.3	[39.3 - 45.3]	0.27
'Rhizobium leguminosarum' (GCF 002953715.1)	Rhizobium fabae CCBAU 33202	50.6	[47.2 - 54.1]	35.9	[33.4 - 38.4]	46.9	[43.9 - 49.9]	0.43
'Rhizobium leguminosarum bv. trifolii WSM1689' (GCF 000517605.1)	Rhizobium pisi DSM 30132	42	[38.7 - 45.5]	35.8	[33.3 - 38.3]	40	[37.0 - 43.0]	0.12
'Rhizobium leguminosarum' (GCF 004123835.1)	Rhizobium pisi DSM 30132	49.7	[46.3 - 53.1]	35.8	[33.4 - 38.4]	46.2	[43.2 - 49.2]	0.12
'Rhizobium leguminosarum bv. trifolii WSM1689' (GCF 000517605.1)	Rhizobium fabae CCBAU 33202	39.2	[35.8 - 42.6]	35.7	[33.2 - 38.2]	37.6	[34.6 - 40.6]	0.03
'Rhizobium leguminosarum' (GCF 002953715.1)	Rhizobium pisi DSM 30132	47.6	[44.2 - 51.1]	35.7	[33.2 - 38.2]	44.5	[41.5 - 47.5]	0.34
'Rhizobium leguminosarum' (GCF 001612535.1)	Rhizobium fabae CCBAU 33202	49.1	[45.7 - 52.5]	35.7	[33.2 - 38.2]	45.6	[42.6 - 48.7]	0.34
'Rhizobium sp. WYCCWR10014' (GCF 001657485.1)	Rhizobium hidalgonense FH14	48.4	[45.0 - 51.9]	35.7	[33.3 - 38.2]	45.1	[42.1 - 48.1]	0.02
'Rhizobium leguminosarum bv. trifolii CC278f' (GCF 000517045.1)	Rhizobium fabae CCBAU 33202	48.7	[45.3 - 52.2]	35.6	[33.2 - 38.1]	45.3	[42.3 - 48.3]	0.5
'Rhizobium leguminosarum bv. trifolii WSM1689' (GCF 000517605.1)	Rhizobium vallis CCBAU 65647	35.8	[32.4 - 39.3]	35.6	[33.1 - 38.1]	34.7	[31.7 - 37.7]	0.33
'Rhizobium leguminosarum' (GCF 001612535.1)	Rhizobium pisi DSM 30132	45.8	[42.4 - 49.2]	35.5	[33.0 - 38.0]	42.9	[40.0 - 46.0]	0.25
'Rhizobium leguminosarum' (GCF 004123835.1)	Rhizobium vallis CCBAU 65647	45.1	[41.7 - 48.5]	35.4	[33.0 - 37.9]	42.3	[39.4 - 45.4]	0.32
'Rhizobium laguerreae' (GCF 012276585.1)	Rhizobium hidalgonense FH14	48	[44.6 - 51.4]	35.4	[33.0 - 37.9]	44.6	[41.7 - 47.7]	0.02
'Rhizobium leguminosarum' (GCF 002953715.1)	Rhizobium vallis CCBAU 65647	44.3	[40.9 - 47.7]	35.4	[33.0 - 37.9]	41.7	[38.7 - 44.7]	0.13
'Rhizobium leguminosarum bv. trifolii CC278f' (GCF 000517045.1)	Rhizobium pisi DSM 30132	46.1	[42.7 - 49.5]	35.3	[32.9 - 37.8]	43.1	[40.1 - 46.1]	0.41
'Rhizobium sp. WYCCWR10014' (GCF 001657485.1)	Rhizobium fabae CCBAU 33202	50.3	[46.8 - 53.7]	35.2	[32.8 - 37.8]	46.4	[43.4 - 49.4]	0.26
'Rhizobium leguminosarum bv. trifolii CC278f' (GCF 000517045.1)	Rhizobium vallis CCBAU 65647	43.2	[39.8 - 46.6]	35.2	[32.8 - 37.7]	40.8	[37.8 - 43.8]	0.2
'Rhizobium laguerreae' (GCF 012276585.1)	Rhizobium fabae CCBAU 33202	48.9	[45.5 - 52.4]	35.1	[32.7 - 37.6]	45.3	[42.3 - 48.4]	0.21
'Rhizobium sp. WYCCWR10014' (GCF 001657485.1)	Rhizobium pisi DSM 30132	47.7	[44.3 - 51.2]	35.1	[32.7 - 37.6]	44.4	[41.4 - 47.4]	0.17
'Rhizobium sp. WYCCWR10014' (GCF 001657485.1)	Rhizobium vallis CCBAU 65647	44	[40.6 - 47.4]	35	[32.6 - 37.5]	41.3	[38.4 - 44.4]	0.04
'Rhizobium laguerreae' (GCF 012276585.1)	Rhizobium pisi DSM 30132	46.5	[43.1 - 49.9]	35	[32.6 - 37.5]	43.4	[40.4 - 46.4]	0.12
'Rhizobium leguminosarum' (GCF 001612535.1)	Rhizobium vallis CCBAU 65647	44	[40.6 - 47.4]	35	[32.6 - 37.6]	41.4	[38.4 - 44.4]	0.04
'Rhizobium laguerreae' (GCF 012276585.1)	Rhizobium vallis CCBAU 65647	43.2	[39.8 - 46.7]	34.7	[32.2 - 37.2]	40.6	[37.7 - 43.7]	0.09
'Rhizobium leguminosarum' (GCF 004123835.1)	Rhizobium esperanzae CNPSo 668	46.4	[43.0 - 49.8]	33.2	[30.8 - 35.7]	42.7	[39.7 - 45.7]	0.04
'Rhizobium leguminosarum' (GCF 002953715.1)	Rhizobium esperanzae CNPSo 668	42.2	[38.8 - 45.6]	33.2	[30.8 - 35.7]	39.4	[36.5 - 42.5]	0.42
'Rhizobium leguminosarum bv. trifolii WSM1689' (GCF 000517605.1)	Rhizobium esperanzae CNPSo 668	42.7	[39.3 - 46.1]	33.2	[30.8 - 35.7]	39.8	[36.8 - 42.8]	0.04
'Rhizobium leguminosarum' (GCF 001612535.1)	Rhizobium esperanzae CNPSo 668	43.1	[39.7 - 46.5]	33.2	[30.8 - 35.7]	40.1	[37.2 - 43.2]	0.33
'Rhizobium leguminosarum bv. trifolii CC278f' (GCF 000517045.1)	Rhizobium esperanzae CNPSo 668	40.6	[37.2 - 44.0]	33	[30.6 - 35.5]	38.1	[35.1 - 41.1]	0.49
'Rhizobium sp. WYCCWR10014' (GCF 001657485.1)	Rhizobium esperanzae CNPSo 668	44.3	[41.0 - 47.8]	32.8	[30.4 - 35.4]	41	[38.0 - 44.0]	0.24
'Rhizobium laguerreae' (GCF 012276585.1)	Rhizobium esperanzae CNPSo 668	45.5	[42.1 - 48.9]	32.6	[30.2 - 35.2]	41.8	[38.8 - 44.9]	0.2

## Sheet: Table S9
Sort_order	Strain	Accession	Genospecies	16S_location	70	71	72	74	151	152	153	111	237	360	518	519	522	527	534	619	630	631	642	814	1021	1023	1036	1151	1152	1169	1207		16S allele	16S allele
1	CF307	GCF_000799945.1	anhuiense	R._leguminosarum_CF307_GCF_000799945.1_NZ_JUHS01000033.1_375-1855	C	C	C	C	G	G	G	-	G	G	C	C	C	T	C	-	A	G	T	T	A	T	A	C	A	-	A	1	a	a
2	CF286	GCF_000800135.1	anhuiense	R._tropici_CF286_GCF_000800135.1_NZ_JUHK01000027.1_375-1855	C	C	C	C	G	G	G	-	G	G	C	C	C	T	C	-	A	G	T	T	A	T	A	C	A	-	A	1	a	a
3	BK398	GCF_004343265.1	anhuiense	R._sp._BK398_BK398_GCF_004343265.1_NZ_SLZM01000028.1_79-1559	C	C	C	C	G	G	G	-	G	G	C	C	C	T	C	-	A	G	T	T	A	T	A	C	A	-	A	1	a	a
4	CCBAU_23252	GCF_003985145.1	anhuiense	R._anhuiense_CCBAU_23252_GCF_003985145.1_NZ_ML133552.1_375-1855	C	C	C	C	G	G	G	-	G	G	C	C	C	T	C	-	A	G	T	T	A	T	A	C	A	-	A	1	a	a
5	CCBAU43229	GCF_012276505.1	anhuiense	R._anhuiense_CCBAU43229_GCF_012276505.1_NZ_WIFM01000053.1_375-1855	C	C	C	C	G	G	G	-	G	G	C	C	C	T	C	-	A	G	T	T	A	T	A	C	A	-	A	1	a	a
6	S10	GCF_002531655.1	anhuiense	R._anhuiense_S10_GCF_002531655.1_NZ_NWSK01000048.1_375-1855	C	C	C	C	G	G	G	-	G	G	G	T	A	C	T	-	A	G	T	T	A	T	A	C	A	-	A	2	l	l
7	Y27	GCF_002531615.1	anhuiense	R._anhuiense_Y27_GCF_002531615.1_NZ_NWSL01000073.1_235-1715	C	C	C	C	G	G	G	-	G	A	C	C	C	T	C	-	A	G	T	T	A	T	A	C	A	-	A	3	a	a
8	JX3	GCF_002531635.1	anhuiense	R._anhuiense_JX3_GCF_002531635.1_NZ_NWSM01000047.1_375-1855	C	C	C	C	G	G	G	-	G	G	C	C	C	T	C	-	A	G	T	T	A	T	A	C	A	-	A	1	a	a
9	C15	GCF_002531695.1	anhuiense	R._anhuiense_C15_GCF_002531695.1_NZ_NWSN01000049.1_c4316-5796	C	C	C	C	G	G	G	-	G	G	C	C	C	T	C	-	A	G	T	T	A	T	A	C	A	-	A	1	a	a
10	J3	GCF_002531645.1	anhuiense	R._anhuiense_J3_GCF_002531645.1_NZ_NWSJ01000036.1_c3213-4693	C	C	C	C	G	G	G	-	G	G	C	C	C	T	C	-	A	G	T	T	A	T	A	C	A	-	A	1	a	a
11	WYCCWR10015	GCF_001632995.1	anhuiense	R._anhuiense_WYCCWR10015_GCF_001632995.1_NZ_LWMO01000017.1_c4108-5588	C	C	C	C	G	G	G	-	G	G	C	C	C	T	C	-	A	G	T	T	A	T	A	C	A	-	A	1	a	a
12	Vaf-46	GCF_001652265.1	L	R._leguminosarum_Vaf-46_GCF_001652265.1_NZ_LWBS01000029.1_405-1885	C	C	C	C	G	G	G	-	G	G	C	C	C	T	C	-	A	G	T	T	A	C	G	C	A	-	A	4	e	e
13	JHI1093	GCF_010668385.1	L	R._leguminosarum_JHI1093_GCF_010668385.1_NZ_WUFA01000097.1_431-1911	C	C	C	C	G	G	G	-	G	G	C	C	C	T	C	-	A	G	T	T	A	T	A	A	A	-	A	13	c	c
14	JHI1096	GCF_010668355.1	L	R._leguminosarum_JHI1096_GCF_010668355.1_NZ_WUEZ01000091.1_431-1911	C	C	C	C	G	G	G	-	G	G	C	C	C	T	C	-	A	G	T	T	A	T	A	A	A	-	A	13	c	c
15	GPTR02	GCF_013004165.1	M	R._laguerreae_GPTR02_GCF_013004165.1_NZ_JABEQY010000088.1_c108-1588	C	C	C	C	G	G	G	-	G	G	C	C	C	T	C	-	A	G	T	T	A	C	G	G	A	-	A	6	f	f
16	GPTR21	GCF_013004185.1	M	R._laguerreae_GPTR21_GCF_013004185.1_NZ_JABERA010000042.1_431-1911	C	C	C	C	G	G	G	-	G	G	C	C	C	T	C	-	A	G	T	T	A	C	G	G	A	-	A	6	f	f
17	SRDI565	GCF_000371905.1	M	R._leguminosarum_SRDI565_GCF_000371905.1_NZ_AQUD01000003.1_c251450-252930	C	C	C	C	G	G	G	-	G	G	C	C	C	T	C	-	A	G	T	T	A	C	G	G	A	-	A	6	f	f
18	GPTR19	GCF_013004175.1	M	R._laguerreae_GPTR19_GCF_013004175.1_NZ_JABEQZ010000079.1_54-1534	C	C	C	C	G	G	G	-	G	G	C	C	C	T	C	-	A	G	T	T	A	C	G	G	A	-	A	6	f	f
19	GPTR08	GCF_010119525.1	M	R._laguerreae_GPTR08_GCF_010119525.1_NZ_JAAEAB010000075.1_c27-1507	C	C	C	C	G	G	G	-	G	G	C	C	C	T	C	-	A	G	T	T	A	C	G	G	A	-	A	6	f	f
20	GPTR29	GCF_013004155.1	M	R._laguerreae_GPTR29_GCF_013004155.1_NZ_JABERB010000049.1_375-1855	C	C	C	C	G	G	G	-	G	G	C	C	C	T	C	-	A	G	T	T	A	C	G	G	A	-	A	6	f	f
21	SM132	GCF_004304375.1	C	gsC_R._leguminosarum_SM132_GCF_004304375.1_NZ_SIOJ01000001.1_c3904943-3906423	C	C	C	C	G	G	G	-	G	G	C	C	C	T	C	-	A	G	T	T	A	T	A	T	A	-	A	12	b	b
22	Vh3	GCF_000373325.1	C	R._leguminosarum_Vh3_GCF_000373325.1																												0	0	0
23	JHI925	GCF_010668625.1	C	R._leguminosarum_JHI925_GCF_010668625.1_NZ_WUFJ01000121.1_374-1854	C	C	C	C	G	G	G	-	G	G	C	C	C	T	C	-	A	G	T	T	A	T	A	T	A	-	A	12	b	b
24	Lp8	GCF_012276035.1	C	R._leguminosarum_Lp8_GCF_012276035.1_NZ_WIEB01000139.1_374-1854	C	C	C	C	G	G	G	-	G	G	C	C	C	T	C	-	A	G	T	T	A	T	A	T	A	-	A	12	b	b
25	Vc2	GCF_000373285.1	C	R._leguminosarum_Vc2_GCF_000373285.1_NZ_KB890804.1_c420-1900	C	C	C	C	G	G	G	-	G	G	C	C	C	T	C	-	A	G	T	T	A	T	A	T	A	-	A	12	b	b
26	FRF1H7	GCF_004330625.1	C	R._leguminosarum_FRF1H7_GCF_004330625.1_NZ_SJMX01000099.1_c4393-5873	C	C	C	C	G	G	G	-	G	G	C	C	C	T	C	-	A	G	T	T	A	T	A	C	A	-	A	1	a	a
27	SM92	GCF_004305315.1	C	gsC_R._leguminosarum_SM92_GCF_004305315.1_NZ_SIMR01000001.1_c3963819-3965299	C	C	C	C	G	G	G	-	G	G	C	C	C	T	C	-	A	G	T	T	A	T	A	C	A	-	A	1	a	a
28	JHI1422	GCF_010668245.1	C	R._leguminosarum_JHI1422_GCF_010668245.1_NZ_WXXN01000061.1_373-1853	C	C	C	C	G	G	G	-	G	G	C	C	C	T	C	-	A	G	T	T	A	T	A	C	A	-	A	1	a	a
29	SM115	GCF_004304975.1	C	gsC_R._leguminosarum_SM115_GCF_004304975.1_NZ_SINO01000001.1_c4028143-4029623	C	C	C	C	G	G	G	-	G	G	C	C	C	T	C	-	A	G	T	T	A	T	A	C	A	-	A	1	a	a
30	SM133A	GCF_004304585.1	C	gsC_R._leguminosarum_SM133A_GCF_004304585.1_NZ_SIOK01000001.1_c4595264-4596744	C	C	C	C	G	G	G	-	G	G	C	C	C	T	C	-	A	G	T	T	A	T	A	C	A	-	A	1	a	a
31	SM97	GCF_004305575.1	C	gsC_R._leguminosarum_SM97_GCF_004305575.1_NZ_SIMW01000001.1_c4119920-4121400	C	C	C	C	G	G	G	-	G	G	C	C	C	T	C	-	A	G	T	T	A	T	A	C	A	-	A	1	a	a
32	SM94	GCF_004305375.1	C	gsC_R._leguminosarum_SM94_GCF_004305375.1_NZ_SIMT01000001.1_c3605851-3607331	C	C	C	C	G	G	G	-	G	G	C	C	C	T	C	-	A	G	T	T	A	T	A	C	A	-	A	1	a	a
33	SM96	GCF_004305005.1	C	gsC_R._leguminosarum_SM96_GCF_004305005.1_NZ_SIMV01000001.1_c4060131-4061611	C	C	C	C	G	G	G	-	G	G	C	C	C	T	C	-	A	G	T	T	A	T	A	C	A	-	A	1	a	a
34	SM113	GCF_004305255.1	C	gsC_R._leguminosarum_SM113_GCF_004305255.1_NZ_SINM01000001.1_c4066469-4067949	C	C	C	C	G	G	G	-	G	G	C	C	C	T	C	-	A	G	T	T	A	T	A	C	A	-	A	1	a	a
35	SM109	GCF_004305085.1	C	gsC_R._leguminosarum_SM109_GCF_004305085.1_NZ_SINI01000001.1_c4154120-4155600	C	C	C	C	G	G	G	-	G	G	C	C	C	T	C	-	A	G	T	T	A	T	A	C	A	-	A	1	a	a
36	SM91	GCF_004304665.1	C	gsC_R._leguminosarum_SM91_GCF_004304665.1_NZ_SIMQ01000001.1_c4089587-4091067	C	C	C	C	G	G	G	-	G	G	C	C	C	T	C	-	A	G	T	T	A	T	A	C	A	-	A	1	a	a
37	JHI1266	GCF_010668285.1	C	R._leguminosarum_JHI1266_GCF_010668285.1_NZ_WUEW01000071.1_373-1853	C	C	C	C	G	G	G	-	G	G	C	C	C	T	C	-	A	G	T	T	A	T	A	C	A	-	A	1	a	a
38	SM90	GCF_004305475.1	C	gsC_R._leguminosarum_SM90_GCF_004305475.1_NZ_SIMP01000001.1_c4501498-4502978	C	C	C	C	G	G	G	-	G	G	C	C	C	T	C	-	A	G	T	T	A	T	A	C	A	-	A	1	a	a
39	SM114	GCF_004305615.1	C	gsC_R._leguminosarum_SM114_GCF_004305615.1_NZ_SINN01000001.1_c4090082-4091562	C	C	C	C	G	G	G	-	G	G	C	C	C	T	C	-	A	G	T	T	A	T	A	C	A	-	A	1	a	a
40	SM85	GCF_004305485.1	C	gsC_R._leguminosarum_SM85_GCF_004305485.1_NZ_SIMK01000001.1_c4042208-4043688	C	C	C	C	G	G	G	-	G	G	C	C	C	T	C	-	A	G	T	T	A	T	A	C	A	-	A	1	a	a
41	SM116	GCF_004305025.1	C	gsC_R._leguminosarum_SM116_GCF_004305025.1_NZ_SINP01000001.1_c4060910-4062390	C	C	C	C	G	G	G	-	G	G	C	C	C	T	C	-	A	G	T	T	A	T	A	C	A	-	A	1	a	a
42	SM120	GCF_004304935.1	C	gsC_R._leguminosarum_SM120_GCF_004304935.1_NZ_SINT01000001.1_c4373110-4374590	C	C	C	C	G	G	G	-	G	G	C	C	C	T	C	-	A	G	T	T	A	T	A	C	A	-	A	1	a	a
43	SM168C	GCF_004303135.1	C	gsC_R._leguminosarum_SM168C_GCF_004303135.1_NZ_SIQZ01000001.1_c3597607-3599087	C	C	C	C	G	G	G	-	G	G	C	C	C	T	C	-	A	G	T	T	A	T	A	A	A	-	A	13	c	c
44	SM151C	GCF_004303995.1	C	gsC_R._leguminosarum_SM151C_GCF_004303995.1_NZ_SIPT01000001.1_c3675793-3677273	C	C	C	C	G	G	G	-	G	G	C	C	C	T	C	-	A	G	T	T	A	T	A	A	A	-	A	13	c	c
45	SM166A	GCF_004303455.1	C	gsC_R._leguminosarum_SM166A_GCF_004303455.1_NZ_SIQU01000001.1_c3650794-3652274	C	C	C	C	G	G	G	-	G	G	C	C	C	T	C	-	A	G	T	T	A	T	A	A	A	-	A	13	c	c
46	SM147A	GCF_004304035.1	C	gsC_R._leguminosarum_SM147A_GCF_004304035.1_NZ_SIPH01000001.1_c3729473-3730953	C	C	C	C	G	G	G	-	G	G	C	C	C	T	C	-	A	G	T	T	A	T	A	A	A	-	A	13	c	c
47	SM147B	GCF_004303885.1	C	gsC_R._leguminosarum_SM147B_GCF_004303885.1_NZ_SIPI01000001.1_c3726215-3727695	C	C	C	C	G	G	G	-	G	G	C	C	C	T	C	-	A	G	T	T	A	T	A	A	A	-	A	13	c	c
48	SM147C	GCF_004303815.1	C	gsC_R._leguminosarum_SM147C_GCF_004303815.1_NZ_SIPJ01000001.1_c3734102-3735582	C	C	C	C	G	G	G	-	G	G	C	C	C	T	C	-	A	G	T	T	A	T	A	A	A	-	A	13	c	c
49	A1	GCA_011128975.2	C	R._leguminosarum_A1_GCA_011128975.2_CP049730.1_4666278-4667758	C	C	C	C	G	G	G	-	G	G	C	C	C	T	C	-	A	G	T	T	A	T	A	A	A	-	A	13	c	c
50	JHI953	GCF_010668555.1	C	R._leguminosarum_JHI953_GCF_010668555.1_NZ_WUFI01000057.1_374-1854	C	C	C	C	G	G	G	-	G	G	C	C	C	T	C	-	A	G	T	T	A	T	A	A	A	-	A	13	c	c
51	SM167	GCF_004303385.1	C	gsC_R._leguminosarum_SM167_GCF_004303385.1_NZ_SIQW01000001.1_c3522459-3523939	C	C	C	C	G	G	G	-	G	G	C	C	C	T	C	-	A	G	T	T	A	T	A	A	A	-	A	13	c	c
52	JHI364	GCF_010668825.1	C	R._leguminosarum_JHI364_GCF_010668825.1_NZ_WUFU01000044.1_c4565-6045	C	C	C	C	G	G	G	-	G	G	C	C	C	T	C	-	A	G	T	T	A	T	A	A	A	-	A	13	c	c
53	VF2	GCF_010668085.1	C	R._leguminosarum_VF2_GCF_010668085.1_NZ_WUEM01000041.1_374-1854	C	C	C	C	G	G	G	-	G	G	C	C	C	T	C	-	A	G	T	T	A	T	A	A	A	-	A	13	c	c
54	SM153A	GCF_004303915.1	C	gsC_R._leguminosarum_SM153A_GCF_004303915.1_NZ_SIPX01000001.1_c3796817-3798297	C	C	C	C	G	G	G	-	G	G	C	C	C	T	C	-	A	G	T	T	A	T	A	C	A	-	A	1	a	a
55	SM126B	GCF_004304735.1	C	gsC_R._leguminosarum_SM126B_GCF_004304735.1_NZ_SIOB01000015.1_360-1840	C	C	C	C	G	G	G	-	G	G	C	C	C	T	C	-	A	G	T	T	A	T	A	C	A	-	A	1	a	a
56	SM153C	GCF_004303845.1	C	gsC_R._leguminosarum_SM153C_GCF_004303845.1_NZ_SIPY01000001.1_c3667783-3669263	C	C	C	C	G	G	G	-	G	G	C	C	C	T	C	-	A	G	T	T	A	T	A	C	A	-	A	1	a	a
57	SM148C	GCF_004304165.1	C	gsC_R._leguminosarum_SM148C_GCF_004304165.1_NZ_SIPM01000001.1_c3440639-3442119	C	C	C	C	G	G	G	-	G	G	C	C	C	T	C	-	A	G	T	T	A	T	A	C	A	-	A	1	a	a
58	SM141A	GCF_004304575.1	C	gsC_R._leguminosarum_SM141A_GCF_004304575.1_NZ_SIOX01000001.1_c3884715-3886195	C	C	C	C	G	G	G	-	G	G	C	C	C	T	C	-	A	G	T	T	A	T	A	C	A	-	A	1	a	a
59	SM158	GCF_004303575.1	C	gsC_R._leguminosarum_SM158_GCF_004303575.1_NZ_SIQJ01000001.1_c3623458-3624938	C	C	C	C	G	G	G	-	G	G	C	C	C	T	C	-	A	G	T	T	A	T	A	C	A	-	A	1	a	a
60	SM157A	GCF_004303635.1	C	gsC_R._leguminosarum_SM157A_GCF_004303635.1_NZ_SIQG01000001.1_c3831315-3832795	C	C	C	C	G	G	G	-	G	G	C	C	C	T	C	-	A	G	T	T	A	T	A	C	A	-	A	1	a	a
61	SM149B	GCF_004304215.1	C	gsC_R._leguminosarum_SM149B_GCF_004304215.1_NZ_SIPO01000001.1_c3643376-3644856	C	C	C	C	G	G	G	-	G	G	C	C	C	T	C	-	A	G	T	T	A	T	A	C	A	-	A	1	a	a
62	SM122A	GCF_004304755.1	C	gsC_R._leguminosarum_SM122A_GCF_004304755.1_NZ_SINW01000001.1_c3700428-3701908	C	C	C	C	G	G	G	-	G	G	C	C	C	T	C	-	A	G	T	T	A	T	A	C	A	-	A	1	a	a
63	SM165B	GCF_004303445.1	C	gsC_R._leguminosarum_SM165B_GCF_004303445.1_NZ_SIQT01000001.1_c3476549-3478029	C	C	C	C	G	G	G	-	G	G	C	C	C	T	C	-	A	G	T	T	A	T	A	C	A	-	A	1	a	a
64	SM165A	GCF_004303315.1	C	gsC_R._leguminosarum_SM165A_GCF_004303315.1_NZ_SIQS01000001.1_c3814396-3815876	C	C	C	C	G	G	G	-	G	G	C	C	C	T	C	-	A	G	T	T	A	T	A	C	A	-	A	1	a	a
65	SM166B	GCF_004303155.1	C	gsC_R._leguminosarum_SM166B_GCF_004303155.1_NZ_SIQV01000001.1_c3651807-3653287	C	C	C	C	G	G	G	-	G	G	C	C	C	T	C	-	A	G	T	T	A	T	A	C	A	-	A	1	a	a
66	SM148B	GCF_004304055.1	C	gsC_R._leguminosarum_SM148B_GCF_004304055.1_NZ_SIPL01000001.1_c3598716-3600196	C	C	C	C	G	G	G	-	G	G	C	C	C	T	C	-	A	G	T	T	A	T	A	C	A	-	A	1	a	a
67	SM153D	GCF_004303775.1	C	gsC_R._leguminosarum_SM153D_GCF_004303775.1_NZ_SIPZ01000001.1_c3685273-3686753	C	C	C	C	G	G	G	-	G	G	C	C	C	T	C	-	A	G	T	T	A	T	A	C	A	-	A	1	a	a
68	SM157B	GCF_004303615.1	C	gsC_R._leguminosarum_SM157B_GCF_004303615.1_NZ_SIQH01000001.1_c3650054-3651534	C	C	C	C	G	G	G	-	G	G	C	C	C	T	C	-	A	G	T	T	A	T	A	C	A	-	A	1	a	a
69	SM157C	GCF_004303335.1	C	gsC_R._leguminosarum_SM157C_GCF_004303335.1_NZ_SIQI01000001.1_406142-407622	C	C	C	C	G	G	G	-	G	G	C	C	C	T	C	-	A	G	T	T	A	T	A	C	A	-	A	1	a	a
70	SM148A	GCF_004303685.1	C	gsC_R._leguminosarum_SM148A_GCF_004303685.1_NZ_SIPK01000025.1_282-1762	C	C	C	C	G	G	G	-	G	G	C	C	C	T	C	-	A	G	T	T	A	T	A	C	A	-	A	1	a	a
71	SM149C	GCF_004304125.1	C	gsC_R._leguminosarum_SM149C_GCF_004304125.1_NZ_SIPP01000001.1_c3656784-3658264	C	C	C	C	G	G	G	-	G	G	C	C	C	T	C	-	A	G	T	T	A	T	A	C	A	-	A	1	a	a
72	SM134A	GCF_004304255.1	C	gsC_R._leguminosarum_SM134A_GCF_004304255.1_NZ_SIOM01000001.1_c3643852-3645332	C	C	C	C	G	G	G	-	G	G	C	C	C	T	C	-	A	G	T	T	A	T	A	C	A	-	A	1	a	a
73	SM134B	GCF_004304235.1	C	gsC_R._leguminosarum_SM134B_GCF_004304235.1_NZ_SION01000001.1_c4042497-4043977	C	C	C	C	G	G	G	-	G	G	C	C	C	T	C	-	A	G	T	T	A	T	A	C	A	-	A	1	a	a
74	SM143	GCF_004304645.1	C	gsC_R._leguminosarum_SM143_GCF_004304645.1_NZ_SIOZ01000001.1_c3696454-3697934	C	C	C	C	G	G	G	-	G	G	C	C	C	T	C	-	A	G	T	T	A	T	A	C	A	-	A	1	a	a
75	SM164A	GCF_004303525.1	C	gsC_R._leguminosarum_SM164A_GCF_004303525.1_NZ_SIQP01000001.1_c3618598-3620078	C	C	C	C	G	G	G	-	G	G	C	C	C	T	C	-	A	G	T	T	A	T	A	C	A	-	A	1	a	a
76	SM164C	GCF_004303425.1	C	gsC_R._leguminosarum_SM164C_GCF_004303425.1_NZ_SIQR01000001.1_c4035192-4036672	C	C	C	C	G	G	G	-	G	G	C	C	C	T	C	-	A	G	T	T	A	T	A	C	A	-	A	1	a	a
77	UPM1133	GCF_012349115.1	C	R._ruizarguesonis_UPM1133_GCF_012349115.1_NZ_PQIG01000143.1_374-1854	C	C	C	C	G	G	G	-	G	G	C	C	C	T	C	-	A	G	T	T	A	T	A	C	A	-	A	1	a	a
78	UPM1135	GCF_012412905.1	C	R._ruizarguesonis_UPM1135_GCF_012412905.1_NZ_PQIE02000001.1_3487-4967	C	C	C	C	G	G	G	-	G	G	C	C	C	T	C	-	A	G	T	T	A	T	A	C	A	-	A	1	a	a
79	UPM1132	GCF_012349105.1	C	R._ruizarguesonis_UPM1132_GCF_012349105.1_NZ_PQIH01000103.1_375-1855	C	C	C	C	G	G	G	-	G	G	C	C	C	T	C	-	A	G	T	T	A	T	A	C	A	-	A	1	a	a
80	UPM1134	GCF_012349085.1	C	R._ruizarguesonis_UPM1134_GCF_012349085.1_NZ_PQIF01000098.1_375-1855	C	C	C	C	G	G	G	-	G	G	C	C	C	T	C	-	A	G	T	T	A	T	A	C	A	-	A	1	a	a
81	JHI782	GCF_010668685.1	C	R._leguminosarum_JHI782_GCF_010668685.1_NZ_WUFN01000050.1_372-1852	C	C	C	C	G	G	G	-	G	G	C	C	C	T	C	-	A	G	T	T	A	T	A	C	A	-	A	1	a	a
82	JHI783	GCF_010668665.1	C	R._leguminosarum_JHI783_GCF_010668665.1_NZ_WUFM01000054.1_372-1852	C	C	C	C	G	G	G	-	G	G	C	C	C	T	C	-	A	G	T	T	A	T	A	C	A	-	A	1	a	a
83	SM103	GCF_004305395.1	C	gsC_R._leguminosarum_SM103_GCF_004305395.1_NZ_SINC01000001.1_c2501938-2503418	C	C	C	C	G	G	G	-	G	G	C	C	C	T	C	-	A	G	T	T	A	T	A	C	A	-	A	1	a	a
84	JHI367	GCF_010668835.1	C	R._leguminosarum_JHI367_GCF_010668835.1_NZ_WUFS01000051.1_372-1852	C	C	C	C	G	G	G	-	G	G	C	C	C	T	C	-	A	G	T	T	A	T	A	C	A	-	A	1	a	a
85	SM108	GCF_004305105.1	C	gsC_R._leguminosarum_SM108_GCF_004305105.1_NZ_SINH01000009.1_372-1852	C	C	C	C	G	G	G	-	G	G	C	C	C	T	C	-	A	G	T	T	A	T	A	C	A	-	A	1	a	a
86	SM95	GCF_004305145.1	C	gsC_R._leguminosarum_SM95_GCF_004305145.1_NZ_SIMU01000001.1_c3625325-3626805	C	C	C	C	G	G	G	-	G	G	C	C	C	T	C	-	A	G	T	T	A	T	A	C	A	-	A	1	a	a
87	SM105	GCF_004305365.1	C	gsC_R._leguminosarum_SM105_GCF_004305365.1_NZ_SINE01000001.1_3665811-3667291	C	C	C	C	G	G	G	-	G	G	C	C	C	T	C	-	A	G	T	T	A	T	A	C	A	-	A	1	a	a
88	SM87	GCF_004305495.1	C	gsC_R._leguminosarum_SM87_GCF_004305495.1_NZ_SIMM01000011.1_c18249-19729	C	C	C	C	G	G	G	-	G	G	C	C	C	T	C	-	A	G	T	T	A	T	A	C	A	-	A	1	a	a
89	SM161	GCF_004303545.1	C	gsC_R._leguminosarum_SM161_GCF_004303545.1_NZ_SIQM01000001.1_c3695582-3697062	C	C	C	C	G	G	G	-	G	G	C	C	C	T	C	-	A	G	T	T	A	T	A	C	A	-	A	1	a	a
90	SM88	GCF_004305605.1	C	gsC_R._leguminosarum_SM88_GCF_004305605.1_NZ_SIMN01000001.1_c3972426-3973906	C	C	C	C	G	G	G	-	G	G	C	C	C	T	C	-	A	G	T	T	A	T	A	C	A	-	A	1	a	a
91	SM112	GCF_004304745.1	C	gsC_R._leguminosarum_SM112_GCF_004304745.1_NZ_SINL01000001.1_c3760492-3761972	C	C	C	C	G	G	G	-	G	G	C	C	C	T	C	-	A	G	T	T	A	T	A	A	A	-	A	13	c	c
92	SM119	GCF_004304955.1	C	gsC_R._leguminosarum_SM119_GCF_004304955.1_NZ_SINS01000001.1_c3719306-3720786	C	C	C	C	G	G	G	-	G	G	C	C	C	T	C	-	A	G	T	T	A	T	A	C	A	-	A	1	a	a
93	JHI42	GCF_010668865.1	C	R._leguminosarum_JHI42_GCF_010668865.1_NZ_WUFW01000062.1_309-1789	C	C	C	C	G	G	G	-	G	G	C	C	C	T	C	-	A	G	T	T	A	T	A	C	A	-	A	1	a	a
94	Ps8	GCF_000375705.1	C	R._leguminosarum_Ps8_GCF_000375705.1																												0	0	0
95	JHI1418	GCF_010668275.1	C	R._leguminosarum_JHI1418_GCF_010668275.1_NZ_WUEU01000059.1_372-1852	C	C	C	C	G	G	G	-	G	G	C	C	C	T	C	-	A	G	T	T	A	T	A	C	A	-	A	1	a	a
96	JHI979	GCF_010668465.1	C	R._leguminosarum_JHI979_GCF_010668465.1_NZ_WUFD01000066.1_372-1852	C	C	C	C	G	G	G	-	G	G	C	C	C	T	C	-	A	G	T	T	A	T	A	C	A	-	A	1	a	a
97	JHI1259	GCF_010668315.1	C	R._leguminosarum_JHI1259_GCF_010668315.1_NZ_WXXO01000059.1_c4447-5927	C	C	C	C	G	G	G	-	G	G	C	C	C	T	C	-	A	G	T	T	A	T	A	C	A	-	A	1	a	a
98	SM100	GCF_004305515.1	C	gsC_R._leguminosarum_SM100_GCF_004305515.1_NZ_SIMZ01000001.1_c3647950-3649430	C	C	C	C	G	G	G	-	G	G	C	C	C	T	C	-	A	G	T	T	A	T	A	C	A	-	A	1	a	a
99	JHI1442	GCF_010668215.1	C	R._leguminosarum_JHI1442_GCF_010668215.1_NZ_WUET01000060.1_372-1852	C	C	C	C	G	G	G	-	G	G	C	C	C	T	C	-	A	G	T	T	A	T	A	C	A	-	A	1	a	a
100	TA1	GCF_000430465.3	C	R._leguminosarum_TA1_GCF_000430465.3_NZ_CP053205.2_c3622920-3624400	C	C	C	C	G	G	G	-	G	G	C	C	C	T	C	-	A	G	T	T	A	T	A	C	A	-	A	1	a	a
101	SM101	GCF_004305545.1	C	gsC_R._leguminosarum_SM101_GCF_004305545.1_NZ_SINA01000001.1_c3605212-3606692	C	C	C	C	G	G	G	-	G	G	C	C	C	T	C	-	A	G	T	T	A	T	A	C	A	-	A	1	a	a
102	RCAM2802	GCA_014189655.1	C	R._leguminosarum_RCAM2802_GCA_014189655.1_CP050562.1_366-1846	C	C	C	C	G	G	G	-	G	G	C	C	C	T	C	-	A	G	T	T	A	T	A	C	A	-	A	1	a	a
103	SM122B	GCF_004305265.1	C	gsC_R._leguminosarum_SM122B_GCF_004305265.1_NZ_SINX01000001.1_c4112016-4113496	C	C	C	C	G	G	G	-	G	G	C	C	C	T	C	-	A	G	T	T	A	T	A	C	A	-	A	1	a	a
104	SM84	GCF_004306055.1	C	gsC_R._leguminosarum_SM84_GCF_004306055.1_NZ_SIMJ01000001.1_c3726096-3727576	C	C	C	C	G	G	G	-	G	G	C	C	C	T	C	-	A	G	T	T	A	T	A	C	A	-	A	1	a	a
105	SM89	GCF_004305305.1	C	gsC_R._leguminosarum_SM89_GCF_004305305.1_NZ_SIMO01000001.1_c3651966-3653446	C	C	C	C	G	G	G	-	G	G	C	C	C	T	C	-	A	G	T	T	A	T	A	C	A	-	A	1	a	a
106	SM117	GCF_004305595.1	C	gsC_R._leguminosarum_SM117_GCF_004305595.1_NZ_SINQ01000001.1_c3709523-3711003	C	C	C	C	G	G	G	-	G	G	C	C	C	T	C	-	A	G	T	T	A	T	A	C	A	-	A	1	a	a
107	SM86	GCF_004305175.1	C	gsC_R._leguminosarum_SM86_GCF_004305175.1_NZ_SIML01000001.1_c4199668-4201148	C	C	C	C	G	G	G	-	G	G	C	C	C	T	C	-	A	G	T	T	A	T	A	C	A	-	A	1	a	a
108	SM98	GCF_004305075.1	C	gsC_R._leguminosarum_SM98_GCF_004305075.1_NZ_SIMX01000001.1_c3767216-3768696	C	C	C	C	G	G	G	-	G	G	C	C	C	T	C	-	A	G	T	T	A	T	A	C	A	-	A	1	a	a
109	SM111	GCF_004305195.1	C	gsC_R._leguminosarum_SM111_GCF_004305195.1_NZ_SINK01000001.1_c1029436-1030916	C	C	C	C	G	G	G	-	G	G	C	C	C	T	C	-	A	G	T	T	A	T	A	C	A	-	A	1	a	a
110	SM104	GCF_004304775.1	C	gsC_R._leguminosarum_SM104_GCF_004304775.1_NZ_SIND01000001.1_c3603888-3605368	C	C	C	C	G	G	G	-	G	G	C	C	C	T	C	-	A	G	T	T	A	T	A	C	A	-	A	1	a	a
111	SM107	GCF_004305095.1	C	gsC_R._leguminosarum_SM107_GCF_004305095.1_NZ_SING01000001.1_c3628228-3629708	C	C	C	C	G	G	G	-	G	G	C	C	C	T	C	-	A	G	T	T	A	T	A	C	A	-	A	1	a	a
112	SM81	GCF_004305685.1	C	gsC_R._leguminosarum_SM81_GCF_004305685.1_NZ_SIMG01000001.1_c3608767-3610247	C	C	C	C	G	G	G	-	G	G	C	C	C	T	C	-	A	G	T	T	A	T	A	C	A	-	A	1	a	a
113	SM129	GCF_004304465.1	C	gsC_R._leguminosarum_SM129_GCF_004304465.1_NZ_SIOF01000001.1_c4335062-4336542	C	C	C	C	G	G	G	-	G	G	C	C	C	T	C	-	A	G	T	T	A	T	A	C	A	-	A	1	a	a
114	SM99B	GCF_004305435.1	C	gsC_R._leguminosarum_SM99B_GCF_004305435.1_NZ_SIMY01000001.1_c4698462-4699942	C	C	C	C	G	G	G	-	G	G	C	C	C	T	C	-	A	G	T	T	A	T	A	C	A	-	A	1	a	a
115	SM133B	GCF_004304435.1	C	gsC_R._leguminosarum_SM133B_GCF_004304435.1_NZ_SIOL01000001.1_4662716-4664196	C	C	C	C	G	G	G	-	G	G	C	C	C	T	C	-	A	G	T	T	A	T	A	C	A	-	A	1	a	a
116	SM110	GCF_004305235.1	C	gsC_R._leguminosarum_SM110_GCF_004305235.1_NZ_SINJ01000001.1_c4083322-4084802	C	C	C	C	G	G	G	-	G	G	C	C	C	T	C	-	A	G	T	T	A	T	A	C	A	-	A	1	a	a
117	SM170C	GCF_004303145.1	C	gsC_R._leguminosarum_SM170C_GCF_004303145.1_NZ_SIRD01000001.1_c3676372-3677852	C	C	C	C	G	G	G	-	G	G	C	C	C	T	C	-	A	G	T	T	A	T	A	C	A	-	A	1	a	a
118	SM170A	GCF_004303115.1	C	gsC_R._leguminosarum_SM170A_GCF_004303115.1_NZ_SIRB01000001.1_c3669019-3670499	C	C	C	C	G	G	G	-	G	G	C	C	C	T	C	-	A	G	T	T	A	T	A	C	A	-	A	1	a	a
119	SM121A	GCF_004305455.1	C	gsC_R._leguminosarum_SM121A_GCF_004305455.1_NZ_SINU01000001.1_c2440816-2442296	C	C	C	C	G	G	G	-	G	G	C	C	C	T	C	-	A	G	T	T	A	T	A	C	A	-	A	1	a	a
120	SM121B	GCF_004304885.1	C	gsC_R._leguminosarum_SM121B_GCF_004304885.1_NZ_SINV01000001.1_c3686090-3687570	C	C	C	C	G	G	G	-	G	G	C	C	C	T	C	-	A	G	T	T	A	T	A	C	A	-	A	1	a	a
121	SM48	GCF_004305825.1	C	gsC_R._leguminosarum_SM48_GCF_004305825.1_NZ_SILD01000001.1_1934626-1936106	C	C	C	C	G	G	G	-	G	G	C	C	C	T	C	-	A	G	T	T	A	T	A	C	A	-	A	1	a	a
122	SM83	GCF_004304855.1	C	gsC_R._leguminosarum_SM83_GCF_004304855.1_NZ_SIMI01000001.1_c4186729-4188209	C	C	C	C	G	G	G	-	G	G	C	C	C	T	C	-	A	G	T	T	A	T	A	C	A	-	A	1	a	a
123	SM93	GCF_004305295.1	C	gsC_R._leguminosarum_SM93_GCF_004305295.1_NZ_SIMS01000001.1_c4205324-4206804	C	C	C	C	G	G	G	-	G	G	C	C	C	T	C	-	A	G	T	T	A	T	A	C	A	-	A	1	a	a
124	RCAM_1026	GCF_001927265.1	C	R._leguminosarum_RCAM_1026_GCF_001927265.1_NZ_MPZP01000064.1_374-1854	C	C	C	C	G	G	G	-	G	G	C	C	C	T	C	-	A	G	T	T	A	T	A	C	A	-	G	19	o	o
125	JHI24	GCF_010668905.1	C	R._leguminosarum_JHI24_GCF_010668905.1_NZ_WUFX01000045.1_374-1854	C	C	C	C	G	G	G	-	G	G	C	C	C	T	C	-	A	G	T	T	A	T	A	C	A	-	A	1	a	a
126	JHI787	GCF_010668635.1	C	R._leguminosarum_JHI787_GCF_010668635.1_NZ_WUFL01000048.1_374-1854	C	C	C	C	G	G	G	-	G	G	C	C	C	T	C	-	A	G	T	T	A	T	A	C	A	-	A	1	a	a
127	SM49	GCF_004306285.1	C	gsC_R._leguminosarum_SM49_GCF_004306285.1_NZ_SILE01000001.1_c3900736-3902216	C	C	C	C	G	G	G	-	G	G	C	C	C	T	C	-	A	G	T	T	A	T	A	C	A	-	A	1	a	a
128	SM47	GCF_004305895.1	C	gsC_R._leguminosarum_SM47_GCF_004305895.1_NZ_SILC01000001.1_c3922788-3924268	C	C	C	C	G	G	G	-	G	G	C	C	C	T	C	-	A	G	T	T	A	T	A	C	A	-	A	1	a	a
129	SM60	GCF_004306185.1	C	gsC_R._leguminosarum_SM60_GCF_004306185.1_NZ_SILP01000001.1_c3867165-3868645	C	C	C	C	G	G	G	-	G	G	C	C	C	T	C	-	A	G	T	T	A	T	A	C	A	-	A	1	a	a
130	L116	GCF_012276295.1	C	R._leguminosarum_L116_GCF_012276295.1_NZ_WIEF01000062.1_374-1854	C	C	C	C	G	G	G	-	G	G	C	C	C	T	C	-	A	G	T	T	A	T	A	C	A	-	A	1	a	a
131	SM102	GCF_004304905.1	C	gsC_R._leguminosarum_SM102_GCF_004304905.1_NZ_SINB01000001.1_c3716090-3717570	C	C	C	C	G	G	G	-	G	G	C	C	C	T	C	-	A	G	T	T	A	T	A	C	A	-	A	1	a	a
132	SM106	GCF_004305185.1	C	gsC_R._leguminosarum_SM106_GCF_004305185.1_NZ_SINF01000001.1_c3609036-3610516	C	C	C	C	G	G	G	-	G	G	C	C	C	T	C	-	A	G	T	T	A	T	A	C	A	-	A	1	a	a
133	SEF5C12	GCF_004329975.1	C	R._leguminosarum_SEF5C12_SEF5C12_16S_2-1482	C	C	C	C	G	G	G	-	G	G	C	C	C	T	C	-	A	G	T	T	A	T	A	C	A	-	A	1	a	a
134	GB29	GCF_012276435.1	C	R._leguminosarum_GB29_GCF_012276435.1_NZ_WIEK01000061.1_c4528-6008	C	C	C	C	G	G	G	-	G	G	C	C	C	T	C	-	A	G	T	T	A	T	A	C	A	-	A	1	a	a
135	JHI788	GCF_010668585.1	C	R._leguminosarum_JHI788_GCF_010668585.1_NZ_WUFK01000062.1_374-1854	C	C	C	C	G	G	G	-	G	G	C	C	C	T	C	-	A	G	T	T	A	T	A	C	A	-	A	1	a	a
136	CZP2H1	GCF_004330815.1	C	R._leguminosarum_CZP2H1_CZP2H1_16S_2-1482	C	C	C	C	G	G	G	-	G	G	C	C	C	T	C	-	A	G	T	T	A	T	A	C	A	-	A	1	a	a
137	CZF1B5	GCF_004330975.1	C	R._leguminosarum_CZF1B5_GCF_004330975.1_NZ_SJNN01000204.1_c4528-6008	C	C	C	C	G	G	G	-	G	G	C	C	C	T	C	-	A	G	T	T	A	T	A	C	A	-	A	1	a	a
138	GB30	GCF_000419745.1	C	R._leguminosarum_GB30_GCF_000419745.1_NZ_ATTP01000068.1_c4528-6008	C	C	C	C	G	G	G	-	G	G	C	C	C	T	C	-	A	G	T	T	A	T	A	C	A	-	A	1	a	a
139	P2.5	GCF_012275925.1	C	R._leguminosarum_P2.5_GCF_012275925.1_NZ_WIDV01000058.1_c4528-6008	C	C	C	C	G	G	G	-	G	G	C	C	C	T	C	-	A	G	T	T	A	T	A	C	A	-	A	1	a	a
140	JHI1592	GCF_010668145.1	C	R._leguminosarum_JHI1592_GCF_010668145.1_NZ_WUER01000052.1_374-1854	C	C	C	C	G	G	G	-	G	G	C	C	C	T	C	-	A	G	T	T	A	T	A	C	A	-	A	1	a	a
141	CZF5B4	GCF_004330955.1	C	R._leguminosarum_CZF5B4_GCF_004330955.1_NZ_SJNL01000046.1_374-1854	C	C	C	C	G	G	G	-	G	G	C	C	C	T	C	-	A	G	T	T	A	T	A	C	A	-	A	1	a	a
142	CZF5G8	GCF_004330945.1	C	R._leguminosarum_CZF5G8_CZF5G8_16S_2-1482	C	C	C	C	G	G	G	-	G	G	C	C	C	T	C	-	A	G	T	T	A	T	A	C	A	-	A	1	a	a
143	JHI388	GCF_010668735.1	C	R._leguminosarum_JHI388_GCF_010668735.1_NZ_WUFQ01000058.1_374-1854	C	C	C	C	G	G	G	-	G	G	C	C	C	T	C	-	A	G	T	T	A	T	A	C	A	-	A	1	a	a
144	JHI1253	GCF_010668345.1	C	R._leguminosarum_JHI1253_GCF_010668345.1_NZ_WUEX01000055.1_374-1854	C	C	C	C	G	G	G	-	G	G	C	C	C	T	C	-	A	G	T	T	A	T	A	C	A	-	A	1	a	a
145	JHI370	GCF_010668785.1	C	R._leguminosarum_JHI370_GCF_010668785.1_NZ_WUFR01000053.1_374-1854	C	C	C	C	G	G	G	-	G	G	C	C	C	T	C	-	A	G	T	T	A	T	A	C	A	-	A	1	a	a
146	JHI387	GCF_010668765.1	C	R._leguminosarum_JHI387_GCF_010668765.1_NZ_WXXQ01000050.1_374-1854	C	C	C	C	G	G	G	-	G	G	C	C	C	T	C	-	A	G	T	T	A	T	A	C	A	-	A	1	a	a
147	CZP3H6	GCF_004330725.1	C	R._leguminosarum_CZP3H6_GCF_004330725.1_NZ_SJNB01000063.1_c4035-5515	C	C	C	C	G	G	G	-	G	G	C	C	C	T	C	-	A	G	T	T	A	T	A	C	A	-	A	1	a	a
148	SM71	GCF_004306385.1	C	gsC_R._leguminosarum_SM71_GCF_004306385.1_NZ_SILX01000001.1_c3749607-3751087	C	C	C	C	G	G	G	-	G	G	C	C	C	T	C	-	A	G	T	T	A	T	A	C	A	-	A	1	a	a
149	SM73	GCF_004305795.1	C	gsC_R._leguminosarum_SM73_GCF_004305795.1_NZ_SILZ01000001.1_c3821003-3822483	C	C	C	C	G	G	G	-	G	G	C	C	C	T	C	-	A	G	T	T	A	T	A	C	A	-	A	1	a	a
150	SM125	GCF_004304835.1	C	gsC_R._leguminosarum_SM125_GCF_004304835.1_NZ_SINZ01000001.1_c4387668-4389148	C	C	C	C	G	G	G	-	G	G	C	C	C	T	C	-	A	G	T	T	A	T	A	C	A	-	A	1	a	a
151	SM170B	GCF_004303245.1	C	gsC_R._leguminosarum_SM170B_GCF_004303245.1_NZ_SIRC01000001.1_c4036341-4037821	C	C	C	C	G	G	G	-	G	G	C	C	C	T	C	-	A	G	T	T	A	T	A	C	A	-	A	1	a	a
152	SM74	GCF_004306305.1	C	gsC_R._leguminosarum_SM74_GCF_004306305.1_NZ_SIMA01000001.1_c3889672-3891152	C	C	C	C	G	G	G	-	G	G	C	C	C	T	C	-	A	G	T	T	A	T	A	C	A	-	A	1	a	a
153	SM42	GCF_004306325.1	C	gsC_R._leguminosarum_SM42_GCF_004306325.1_NZ_SIKX01000001.1_c3934474-3935954	C	C	C	C	G	G	G	-	G	G	C	C	C	T	C	-	A	G	T	T	A	T	A	C	A	-	A	1	a	a
154	SM56	GCF_004306705.1	C	gsC_R._leguminosarum_SM56_GCF_004306705.1_NZ_SILL01000001.1_c3711101-3712581	C	C	C	C	G	G	G	-	G	G	C	C	C	T	C	-	A	G	T	T	A	T	A	C	A	-	A	1	a	a
155	SM57	GCF_004306695.1	C	gsC_R._leguminosarum_SM57_GCF_004306695.1_NZ_SILM01000001.1_c3798737-3800217	C	C	C	C	G	G	G	-	G	G	C	C	C	T	C	-	A	G	T	T	A	T	A	C	A	-	A	1	a	a
156	SM59	GCF_004306245.1	C	gsC_R._leguminosarum_SM59_GCF_004306245.1_NZ_SILO01000001.1_c3785995-3787475	C	C	C	C	G	G	G	-	G	G	C	C	C	T	C	-	A	G	T	T	A	T	A	C	A	-	A	1	a	a
157	SM44	GCF_004306495.1	C	gsC_R._leguminosarum_SM44_GCF_004306495.1_NZ_SIKZ01000009.1_374-1854	C	C	C	C	G	G	G	-	G	G	C	C	C	T	C	-	A	G	T	T	A	T	A	C	A	-	A	1	a	a
158	SM67	GCF_004306615.1	C	gsC_R._leguminosarum_SM67_GCF_004306615.1_NZ_SILT01000009.1_374-1854	C	C	C	C	G	G	G	-	G	G	C	C	C	T	C	-	A	G	T	T	A	T	A	C	A	-	A	1	a	a
159	SM68	GCF_004306485.1	C	gsC_R._leguminosarum_SM68_GCF_004306485.1_NZ_SILU01000011.1_374-1854	C	C	C	C	G	G	G	-	G	G	C	C	C	T	C	-	A	G	T	T	A	T	A	C	A	-	A	1	a	a
160	SM82	GCF_004306075.1	C	gsC_R._leguminosarum_SM82_GCF_004306075.1_NZ_SIMH01000008.1_374-1854	C	C	C	C	G	G	G	-	G	G	C	C	C	T	C	-	A	G	T	T	A	T	A	C	A	-	A	1	a	a
161	SM54	GCF_004305915.1	C	gsC_R._leguminosarum_SM54_GCF_004305915.1_NZ_SILJ01000010.1_c7737-9217	C	C	C	C	G	G	G	-	G	G	C	C	C	T	C	-	A	G	T	T	A	T	A	C	A	-	A	1	a	a
162	SM80	GCF_004305765.1	C	gsC_R._leguminosarum_SM80_GCF_004305765.1_NZ_SIMF01000014.1_374-1854	C	C	C	C	G	G	G	-	G	G	C	C	C	T	C	-	A	G	T	T	A	T	A	C	A	-	A	1	a	a
163	SM150	GCF_004304105.1	C	gsC_R._leguminosarum_SM150_GCF_004304105.1_NZ_SIPQ01000021.1_374-1854	C	C	C	C	G	G	G	-	G	G	C	C	C	T	C	-	A	G	T	T	A	T	A	C	A	-	A	1	a	a
164	SEF4H7	GCF_004329995.1	C	R._leguminosarum_SEF4H7_GCF_004329995.1_NZ_SJMB01000117.1_374-1854	C	C	C	C	G	G	G	-	G	G	C	C	C	T	C	-	A	G	T	T	A	T	A	C	A	-	A	1	a	a
165	SM53	GCF_004306365.1	C	gsC_R._leguminosarum_SM53_GCF_004306365.1_NZ_SILI01000013.1_c7737-9217	C	C	C	C	G	G	G	-	G	G	C	C	C	T	C	-	A	G	T	T	A	T	A	C	A	-	A	1	a	a
166	SM43	GCF_004306775.1	C	gsC_R._leguminosarum_SM43_GCF_004306775.1_NZ_SIKY01000011.1_c7818-9298	C	C	C	C	G	G	G	-	G	G	C	C	C	T	C	-	A	G	T	T	A	T	A	C	A	-	A	1	a	a
167	SM58	GCF_004305715.1	C	gsC_R._leguminosarum_SM58_GCF_004305715.1_NZ_SILN01000001.1_c3896976-3898456	C	C	C	C	G	G	G	-	G	G	C	C	C	T	C	-	A	G	T	T	A	T	A	C	A	-	A	1	a	a
168	CZP2D2	GCF_004330835.1	C	R._leguminosarum_CZP2D2_GCF_004330835.1_NZ_SJNF01000061.1_374-1854	C	C	C	C	G	G	G	-	G	G	C	C	C	T	C	-	A	G	T	T	A	T	A	C	A	-	A	1	a	a
169	RCAM0626	GCA_014189575.1	C	R._leguminosarum_RCAM0626_GCA_014189575.1_CP050555.1_384860-386339	C	C	C	C	G	G	G	-	G	G	C	C	C	T	C	-	G	T	C	-	A	T	A	C	A	-	A	18	n	n
170	31B	GCF_011604465.1	C	R._leguminosarum_31B_GCF_011604465.1_NZ_CP050080.1_4536277-4537757	C	C	C	C	G	G	G	-	G	G	C	C	C	T	C	-	A	G	T	T	A	T	A	C	A	-	A	1	a	a
171	SM137A	GCF_004304265.1	C	gsC_R._leguminosarum_SM137A_GCF_004304265.1_NZ_SIOR01000001.1_c3700925-3702405	C	C	C	C	G	G	G	-	G	G	C	C	C	T	C	-	A	G	T	T	A	T	A	C	A	-	A	1	a	a
172	SM118	GCF_004304965.1	C	gsC_R._leguminosarum_SM118_GCF_004304965.1_NZ_SINR01000001.1_c3675487-3676967	C	C	C	C	G	G	G	-	G	G	C	C	C	T	C	-	A	G	T	T	A	T	A	C	A	-	A	1	a	a
173	SEF4B9	GCF_004330015.1	C	R._leguminosarum_SEF4B9_GCF_004330015.1_NZ_SJMD01000025.1_c204-1684	C	C	C	C	G	G	G	-	G	G	C	C	C	T	C	-	A	G	T	T	A	T	A	C	A	-	A	1	a	a
174	VF5	GCF_010668055.1	C	R._leguminosarum_VF5_GCF_010668055.1_NZ_WUEL01000051.1_c4531-6011	C	C	C	C	G	G	G	-	G	G	C	C	C	T	C	-	A	G	T	T	A	T	A	C	A	-	A	1	a	a
175	SM55	GCF_004306675.1	C	gsC_R._leguminosarum_SM55_GCF_004306675.1_NZ_SILK01000001.1_c4305857-4307337	C	C	C	C	G	G	G	-	G	G	C	C	C	T	C	-	A	G	T	T	A	T	A	C	A	-	A	1	a	a
176	SM127	GCF_004304685.1	C	gsC_R._leguminosarum_SM127_GCF_004304685.1_NZ_SIOC01000001.1_c3754268-3755748	C	C	C	C	G	G	G	-	G	G	C	C	C	T	C	-	A	G	T	T	A	T	A	C	A	-	A	1	a	a
177	SM169	GCF_004303225.1	C	gsC_R._leguminosarum_SM169_GCF_004303225.1_NZ_SIRA01000001.1_c3560296-3561776	C	C	C	C	G	G	G	-	G	G	C	C	C	T	C	-	A	G	T	T	A	T	A	C	A	-	A	1	a	a
178	SM77	GCF_004306275.1	C	gsC_R._leguminosarum_SM77_GCF_004306275.1_NZ_SIMC01000001.1_c5074679-5076159	C	C	C	C	G	G	G	-	G	G	C	C	C	T	C	-	A	G	T	T	A	T	A	C	A	-	A	1	a	a
179	SM76	GCF_004306095.1	C	gsC_R._leguminosarum_SM76_GCF_004306095.1_NZ_SIMB01000001.1_c3820013-3821493	C	C	C	C	G	G	G	-	G	G	C	C	C	T	C	-	A	G	T	T	A	T	A	C	A	-	A	1	a	a
180	SM46	GCF_004306475.1	C	gsC_R._leguminosarum_SM46_GCF_004306475.1_NZ_SILB01000001.1_c4459671-4461151	C	C	C	C	G	G	G	-	G	G	C	C	C	T	C	-	A	G	T	T	A	T	A	C	A	-	A	1	a	a
181	JHI985	GCF_010668445.1	C	R._leguminosarum_JHI985_GCF_010668445.1_NZ_WUFC01000070.1_c4093-5573	C	C	C	C	G	G	G	-	G	G	C	C	C	T	C	-	A	G	T	T	A	T	A	C	A	-	A	1	a	a
182	SM41	GCF_004305845.1	C	gsC_R._leguminosarum_SM41_GCF_004305845.1_NZ_SIKW01000001.1_c3751100-3752580	C	C	C	C	G	G	G	-	G	G	C	C	C	T	C	-	A	G	T	T	A	T	A	C	A	-	A	1	a	a
183	SM70	GCF_004305815.1	C	gsC_R._leguminosarum_SM70_GCF_004305815.1_NZ_SILW01000001.1_c3789634-3791114	C	C	C	C	G	G	G	-	G	G	C	C	C	T	C	-	A	G	T	T	A	T	A	C	A	-	A	1	a	a
184	SM69	GCF_004322935.1	C	gsC_R._leguminosarum_SM69_GCF_004322935.1_NZ_SILV01000001.1_c3623106-3624586	C	C	C	C	G	G	G	-	G	G	C	C	C	T	C	-	A	G	T	T	A	T	A	C	A	-	A	1	a	a
185	SM66	GCF_004306595.1	C	gsC_R._leguminosarum_SM66_GCF_004306595.1_NZ_SILS01000001.1_c3677676-3679156	C	C	C	C	G	G	G	-	G	G	C	C	C	T	C	-	A	G	T	T	A	T	A	C	A	-	A	1	a	a
186	SM63	GCF_004305675.1	C	gsC_R._leguminosarum_SM63_GCF_004305675.1_NZ_SILR01000001.1_c3738319-3739799	C	C	C	C	G	G	G	-	G	G	C	C	C	T	C	-	A	G	T	T	A	T	A	C	A	-	A	1	a	a
187	SM50	GCF_004306575.1	C	gsC_R._leguminosarum_SM50_GCF_004306575.1_NZ_SILF01000001.1_c3693486-3694966	C	C	C	C	G	G	G	-	G	G	C	C	C	T	C	-	A	G	T	T	A	T	A	C	A	-	A	1	a	a
188	SM61	GCF_004306165.1	C	gsC_R._leguminosarum_SM61_GCF_004306165.1_NZ_SILQ01000001.1_c3681715-3683195	C	C	C	C	G	G	G	-	G	G	C	C	C	T	C	-	A	G	T	T	A	T	A	C	A	-	A	1	a	a
189	CC278f	GCF_000517045.1	unique	R._leguminosarum_CC278f_GCF_000517045.1_NZ_KI912100.1_1821570-1823050	C	C	C	C	G	G	G	-	G	G	C	C	C	T	C	-	A	G	T	T	A	T	A	A	A	-	A	13	c	c
190	Norway	GCF_002953715.1	unique	R._leguminosarum_Norway_GCF_002953715.1_NZ_CP025012.1_c3610458-3611938	C	C	C	C	G	G	G	-	G	G	C	C	C	T	C	-	A	G	T	T	A	T	A	A	A	-	A	13	c	c
191	WSM80	GCF_004028075.1	D	R._leguminosarum_WSM80_GCF_004028075.1_NZ_SBHW01000163.1_706-2186	C	C	C	C	G	G	G	-	G	G	C	C	C	T	C	-	A	G	T	T	A	T	A	A	A	-	A	13	c	c
192	L145	GCF_012276215.1	D	R._leguminosarum_L145_GCF_012276215.1_NZ_WIED01000054.1_c4456-5936	C	C	C	C	G	G	G	-	G	G	C	C	C	T	C	-	A	G	T	T	A	T	A	A	A	-	A	13	c	c
193	SM78	GCF_004305755.1	D	gsD_R._leguminosarum_SM78_GCF_004305755.1_NZ_SIMD01000009.1_392-1872	C	C	C	C	G	G	G	-	G	G	C	C	C	T	C	-	A	G	T	T	A	T	A	A	A	-	A	13	c	c
194	SM72	GCF_004306415.1	D	gsD_R._leguminosarum_SM72_GCF_004306415.1_NZ_SILY01000001.1_c3635033-3636513	C	C	C	C	G	G	G	-	G	G	C	C	C	T	C	-	A	G	T	T	A	T	A	A	A	-	A	13	c	c
195	SM164B	GCF_004303415.1	D	gsD_R._leguminosarum_SM164B_GCF_004303415.1_NZ_SIQQ01000026.1_c4340-5820	C	C	C	C	G	G	G	-	G	G	C	C	C	T	C	-	A	G	T	T	A	T	A	A	A	-	A	13	c	c
196	WSM448	GCF_004028185.1	D	R._leguminosarum_WSM448_GCF_004028185.1_NZ_SBHX01000177.1_597-2077	C	C	C	C	G	G	G	-	G	G	C	C	C	T	C	-	A	G	T	T	A	T	A	A	A	-	A	13	c	c
197	SM51	GCF_004306515.1	D	gsD_R._leguminosarum_SM51_GCF_004306515.1_NZ_SILG01000014.1_306-1786	C	C	C	C	G	G	G	-	G	G	C	C	C	T	C	-	A	G	T	T	A	T	A	A	A	-	A	13	c	c
198	SM79	GCF_004305055.1	D	gsD_R._leguminosarum_SM79_GCF_004305055.1_NZ_SIME01000001.1_c3455341-3456821	C	C	C	C	G	G	G	-	G	G	C	C	C	T	C	-	A	G	T	T	A	T	A	A	A	-	A	13	c	c
199	ATCC_14479	GCF_003290405.1	E	R._leguminosarum_ATCC_14479_GCF_003290405.1_NZ_CP030760.1_c2127272-2128752	C	C	C	C	G	G	G	-	G	G	C	C	C	T	C	-	A	G	T	T	A	T	A	C	A	-	A	1	a	a
200	DSM_30141	GCF_014138565.1	E	R._leguminosarum_DSM_30141_GCF_014138565.1_NZ_JACJHV010000035.1_c3602-5082	C	C	C	C	G	G	G	-	G	G	C	C	C	T	C	-	A	G	T	T	A	T	A	C	A	-	A	1	a	a
201	RCAM0610	GCA_014189555.1	E	R._leguminosarum_RCAM0610_GCA_014189555.1_CP050549.1_391-1871	C	C	C	C	G	G	G	-	G	G	C	C	C	T	C	-	A	G	T	T	A	T	A	C	A	-	A	1	a	a
202	GB51	GCF_012276395.1	E	R._leguminosarum_GB51_GCF_012276395.1_NZ_WIEJ01000060.1_c163-1643	C	C	C	C	G	G	G	-	G	G	C	C	C	T	C	-	A	G	T	T	A	T	A	C	A	-	A	1	a	a
203	P2.59	GCF_012275835.1	E	R._leguminosarum_P2.59_GCF_012275835.1_NZ_WIDU01000063.1_141-1621	C	C	C	C	G	G	G	-	G	G	C	C	C	T	C	-	A	G	T	T	A	T	A	C	A	-	A	1	a	a
204	GD25	GCF_012276375.1	E	R._leguminosarum_GD25_GCF_012276375.1_NZ_WIEI01000044.1_392-1872	C	C	C	C	G	G	G	-	G	G	C	C	C	T	C	-	A	G	T	T	A	T	A	C	A	-	A	1	a	a
205	SM135B	GCF_004304595.1	E	gsE_R._leguminosarum_SM135B_GCF_004304595.1_NZ_SIOP01000001.1_c4159662-4161142	C	C	C	C	G	G	G	-	G	G	C	C	C	T	C	-	A	G	T	T	A	T	A	C	A	-	A	1	a	a
206	SM135A	GCF_004304495.1	E	gsE_R._leguminosarum_SM135A_GCF_004304495.1_NZ_SIOO01000001.1_c3483682-3485162	C	C	C	C	G	G	G	-	G	G	C	C	C	T	C	-	A	G	T	T	A	T	A	C	A	-	A	1	a	a
207	SM149A	GCF_004304155.1	E	gsE_R._leguminosarum_SM149A_GCF_004304155.1_NZ_SIPN01000001.1_c3948176-3949656	C	C	C	C	G	G	G	-	G	G	C	C	C	T	C	-	A	G	T	T	A	T	A	C	A	-	A	1	a	a
208	SM160	GCF_004303515.1	E	gsE_R._leguminosarum_SM160_GCF_004303515.1_NZ_SIQL01000001.1_c3564948-3566428	C	C	C	C	G	G	G	-	G	G	C	C	C	T	C	-	A	G	T	T	A	T	A	C	A	-	A	1	a	a
209	SM141B	GCF_004303925.1	E	gsE_R._leguminosarum_SM141B_GCF_004303925.1_NZ_SIOY01000001.1_c4022021-4023501	C	C	C	C	G	G	G	-	G	G	C	C	C	T	C	-	A	G	T	T	A	T	A	C	A	-	A	1	a	a
210	SM168A	GCF_004303215.1	E	gsE_R._leguminosarum_SM168A_GCF_004303215.1_NZ_SIQX01000001.1_c3334945-3336425	C	C	C	C	G	G	G	-	G	G	C	C	C	T	C	-	A	G	T	T	A	T	A	C	A	-	A	1	a	a
211	SM168B	GCF_004303125.1	E	gsE_R._leguminosarum_SM168B_GCF_004303125.1_NZ_SIQY01000001.1_c3489705-3491185	C	C	C	C	G	G	G	-	G	G	C	C	C	T	C	-	A	G	T	T	A	T	A	C	A	-	A	1	a	a
212	SM159	GCF_004303345.1	E	gsE_R._leguminosarum_SM159_GCF_004303345.1_NZ_SIQK01000001.1_c3904281-3905761	C	C	C	C	G	G	G	-	G	G	C	C	C	T	C	-	A	G	T	T	A	T	A	C	A	-	A	1	a	a
213	SM126A	GCF_004304815.1	E	gsE_R._leguminosarum_SM126A_GCF_004304815.1_NZ_SIOA01000001.1_c3923616-3925096	C	C	C	C	G	G	G	-	G	G	C	C	C	T	C	-	A	G	T	T	A	T	A	C	A	-	A	1	a	a
214	3B	GCF_011604545.1	E	R._leguminosarum_3B_GCF_011604545.1_NZ_CP050108.1_c3189936-3191416	C	C	C	C	G	G	G	-	G	G	C	C	C	T	C	-	A	G	T	T	A	T	A	C	A	-	A	1	a	a
215	4B	GCF_011604565.1	E	R._leguminosarum_4B_GCF_011604565.1_NZ_CP050103.1_c3190242-3191722	C	C	C	C	G	G	G	-	G	G	C	C	C	T	C	-	A	G	T	T	A	T	A	C	A	-	A	1	a	a
216	OV152	GCF_000799985.1	E	R._leguminosarum_OV152_GCF_000799985.1_NZ_JUHU01000040.1_c4319-5799	C	C	C	C	G	G	G	-	G	G	C	C	C	T	C	-	A	G	T	T	A	T	A	C	A	-	A	1	a	a
217	FRP3G5	GCF_004330525.1	E	R._leguminosarum_FRP3G5_GCF_004330525.1_NZ_SJMR01000046.1_c4433-5913	C	C	C	C	G	G	G	-	G	G	C	C	C	T	C	-	A	G	T	T	A	T	A	C	A	-	A	1	a	a
218	23B	GCF_011604505.1	E	R._leguminosarum_23B_GCF_011604505.1_NZ_CP050085.1_3880878-3882358	C	C	C	C	G	G	G	-	G	G	C	C	C	T	C	-	A	G	T	T	A	T	A	C	A	-	A	1	a	a
219	P1.14	GCF_012275975.1	E	R._leguminosarum_P1.14_GCF_012275975.1_NZ_WIEA01000071.1_c4516-5996	C	C	C	C	G	G	G	-	G	G	C	C	C	T	C	-	A	G	T	T	A	T	A	C	A	-	A	1	a	a
220	FRP3A12	GCF_004330515.1	E	R._leguminosarum_FRP3A12_GCF_004330515.1_NZ_SJMU01000058.1_c111-1591	C	C	C	C	G	G	G	-	G	G	C	C	C	T	C	-	A	G	T	T	A	T	A	C	A	-	A	1	a	a
221	LCS0306	GCF_009755765.1	E	R._leguminosarum_LCS0306_GCF_009755765.1_NZ_WNKD01000046.1_392-1872	C	C	C	C	G	G	G	-	G	G	C	C	C	T	C	-	A	G	T	T	A	T	A	C	A	-	A	1	a	a
222	SEMIA_460	GCF_014138515.1	E	R._leguminosarum_SEMIA_460_GCF_014138515.1_NZ_JACJIU010000024.1_c3952-5432	C	C	C	C	G	G	G	-	G	G	C	C	C	T	C	-	A	G	T	T	A	T	A	C	A	-	A	1	a	a
223	IAUb11	GCF_012275645.1	E	R._leguminosarum_IAUb11_GCF_012275645.1_NZ_WIEH01000057.1_392-1872	C	C	C	C	G	G	G	-	G	G	C	C	C	T	C	-	A	G	T	T	A	T	A	C	A	-	A	1	a	a
224	Rt24.2	GCF_001679565.1	E	R._leguminosarum_Rt24.2_GCF_001679565.1_NZ_MAMO01000119.1_c4724-6204	C	C	C	C	G	G	G	-	G	G	C	C	C	T	C	-	A	G	T	T	A	T	A	C	A	-	A	1	a	a
225	CB1	GCF_004028065.1	E	R._leguminosarum_CB1_GCF_004028065.1_NZ_SBHT01000350.1_599-2079	C	C	C	C	G	G	G	-	G	G	C	C	C	T	C	-	A	G	T	T	A	T	A	C	A	-	A	1	a	a
226	FRP2D7	GCF_004330615.1	E	R._leguminosarum_FRP2D7_GCF_004330615.1_NZ_SJMV01000036.1_141-1621	C	C	C	C	G	G	G	-	G	G	C	C	C	T	C	-	A	G	T	T	A	T	A	C	A	-	A	1	a	a
227	SM52	GCF_004306555.1	E	gsE_R._leguminosarum_SM52_GCF_004306555.1_NZ_SILH01000001.1_c3476916-3478396	C	C	C	C	G	G	G	-	G	G	C	C	C	T	C	-	A	G	T	T	A	T	A	C	A	-	A	1	a	a
228	UPM1137	GCF_000427705.1	E	R._leguminosarum_UPM1137_GCF_000427705.1_NZ_ATYN01000048.1_c4704-6184	C	C	C	C	G	G	G	-	G	G	C	C	C	T	C	-	A	G	T	T	A	T	A	C	A	-	A	1	a	a
229	SM45	GCF_004305865.1	E	gsE_R._leguminosarum_SM45_GCF_004305865.1_NZ_SILA01000001.1_c3625290-3626770	C	C	C	C	G	G	G	-	G	G	C	C	C	T	C	-	A	G	T	T	A	T	A	C	A	-	A	1	a	a
230	FRP5A4	GCF_004330235.1	E	R._leguminosarum_FRP5A4_GCF_004330235.1_NZ_SJMO01000060.1_c3989-5469	C	C	C	C	G	G	G	-	G	G	C	C	C	T	C	-	A	G	T	T	A	T	A	C	A	-	A	1	a	a
231	FRF1A1	GCF_004330635.1	E	R._leguminosarum_FRF1A1_GCF_004330635.1_NZ_SJMZ01000056.1_63-1543	C	C	C	C	G	G	G	-	G	G	C	C	C	T	C	-	A	G	T	T	A	T	A	C	A	-	A	1	a	a
232	FRF3E2	GCF_004330645.1	E	R._leguminosarum_FRF3E2_GCF_004330645.1_NZ_SJMW01000083.1_63-1543	C	C	C	C	G	G	G	-	G	G	C	C	C	T	C	-	A	G	T	T	A	T	A	C	A	-	A	1	a	a
233	CZP3H7	GCF_004330715.1	E	R._leguminosarum_CZP3H7_GCF_004330715.1_NZ_SJNA01000067.1_c643-2123	C	C	C	C	G	G	G	-	G	G	C	C	C	T	C	-	A	G	T	T	A	T	A	C	A	-	A	1	a	a
234	SEMIA_499	GCF_014198835.1	E	R._leguminosarum_SEMIA_499_GCF_014198835.1_NZ_JACIIH010000045.1_c4119-5599	C	C	C	C	G	G	G	-	G	G	C	C	C	T	C	-	A	G	T	T	A	T	A	C	A	-	A	1	a	a
235	SEP4B10	GCF_004329875.1	E	R._leguminosarum_SEP4B10_GCF_004329875.1_NZ_SJLY01000035.1_392-1872	C	C	C	C	G	G	G	-	G	G	C	C	C	T	C	-	A	G	T	T	A	T	A	C	A	-	A	1	a	a
236	USDA_2370	GCF_002008365.1	E	R._leguminosarum_USDA_2370_GCF_002008365.1_NZ_MRDL01000029.1_c4119-5599	C	C	C	C	G	G	G	-	G	G	C	C	C	T	C	-	A	G	T	T	A	T	A	C	A	-	A	1	a	a
237	SEMIA_498	GCF_014198195.1	E	R._leguminosarum_SEMIA_498_GCF_014198195.1_NZ_JACIHA010000048.1_c4119-5599	C	C	C	C	G	G	G	-	G	G	C	C	C	T	C	-	A	G	T	T	A	T	A	C	A	-	A	1	a	a
238	P221	GCF_012275915.1	E	R._leguminosarum_P221_GCF_012275915.1_NZ_WIDZ01000043.1_c4119-5599	C	C	C	C	G	G	G	-	G	G	C	C	C	T	C	-	A	G	T	T	A	T	A	C	A	-	A	1	a	a
239	SEMIA_416	GCF_014197975.1	E	R._leguminosarum_SEMIA_416_GCF_014197975.1_NZ_JACIGP010000042.1_c4119-5599	C	C	C	C	G	G	G	-	G	G	C	C	C	T	C	-	A	G	T	T	A	T	A	C	A	-	A	1	a	a
240	SEMIA_488	GCF_014206965.1	E	R._leguminosarum_SEMIA_488_GCF_014206965.1_NZ_JACIIC010000043.1_c4119-5599	C	C	C	C	G	G	G	-	G	G	C	C	C	T	C	-	A	G	T	T	A	T	A	C	A	-	A	1	a	a
241	CZP1G4	GCF_004330845.1	E	R._leguminosarum_CZP1G4_GCF_004330845.1_NZ_SJNI01000042.1_392-1872	C	C	C	C	G	G	G	-	G	G	C	C	C	T	C	-	A	G	T	T	A	T	A	C	A	-	A	1	a	a
242	FRP3E11	GCF_004330545.1	E	R._leguminosarum_FRP3E11_GCF_004330545.1_NZ_SJMT01000068.1_c4119-5599	C	C	C	C	G	G	G	-	G	G	C	C	C	T	C	-	A	G	T	T	A	T	A	C	A	-	A	1	a	a
243	SEP2G2	GCF_004329895.1	E	R._leguminosarum_SEP2G2_GCF_004329895.1_NZ_SJLZ01000066.1_c4119-5599	C	C	C	C	G	G	G	-	G	G	C	C	C	T	C	-	A	G	T	T	A	T	A	C	A	-	A	1	a	a
244	FRP5C5	GCF_004330225.1	E	R._leguminosarum_FRP5C5_GCF_004330225.1_NZ_SJMN01000044.1_c4542-6022	C	C	C	C	G	G	G	-	G	G	C	C	C	T	C	-	A	G	T	T	A	T	A	C	A	-	A	1	a	a
245	JHI944	GCF_010668605.1	E	R._leguminosarum_JHI944_GCF_010668605.1_NZ_WXXP01000053.1_392-1872	C	C	C	C	G	G	G	-	G	G	C	C	C	T	C	-	A	G	T	T	A	T	A	C	A	-	A	1	a	a
246	SEMIA_481	GCF_014198655.1	E	R._leguminosarum_SEMIA_481_GCF_014198655.1_NZ_JACIHY010000048.1_c4119-5599	C	C	C	C	G	G	G	-	G	G	C	C	C	T	C	-	A	G	T	T	A	T	A	C	A	-	A	1	a	a
247	RSP1E11	GCF_004330095.1	E	R._leguminosarum_RSP1E11_GCF_004330095.1_NZ_SJMH01000067.1_392-1872	C	C	C	C	G	G	G	-	G	G	C	C	C	T	C	-	A	G	T	T	A	T	A	C	A	-	A	1	a	a
248	SEP3F1	GCF_004329915.1	E	R._leguminosarum_SEP3F1_GCF_004329915.1_NZ_SJLV01000041.1_392-1872	C	C	C	C	G	G	G	-	G	G	C	C	C	T	C	-	A	G	T	T	A	T	A	C	A	-	A	1	a	a
249	SEP5D7	GCF_004329905.1	E	R._leguminosarum_SEP5D7_GCF_004329905.1_NZ_SJLW01000058.1_392-1872	C	C	C	C	G	G	G	-	G	G	C	C	C	T	C	-	A	G	T	T	A	T	A	C	A	-	A	1	a	a
250	FRP5D3	GCF_004330205.1	E	R._leguminosarum_FRP5D3_GCF_004330205.1_NZ_SJMM01000036.1_392-1872	C	C	C	C	G	G	G	-	G	G	C	C	C	T	C	-	A	G	T	T	A	T	A	C	A	-	A	1	a	a
251	L113	GCF_012275605.1	E	R._leguminosarum_L113_GCF_012275605.1_NZ_WIEG01000098.1_432-1912	C	C	C	C	G	G	G	-	G	G	C	C	C	T	C	-	A	G	T	T	A	T	A	C	A	-	A	1	a	a
252	FRP4H3	GCF_004330265.1	E	R._leguminosarum_FRP4H3_GCF_004330265.1_NZ_SJMP01000061.1_392-1872	C	C	C	C	G	G	G	-	G	G	C	C	C	T	C	-	A	G	T	T	A	T	A	C	A	-	A	1	a	a
253	SEMIA_483	GCF_014198695.1	E	R._leguminosarum_SEMIA_483_GCF_014198695.1_NZ_JACIIA010000055.1_392-1872	C	C	C	C	G	G	G	-	G	G	C	C	C	T	C	-	A	G	T	T	A	T	A	C	A	-	A	1	a	a
254	SEMIA_445	GCF_014198115.1	E	R._leguminosarum_SEMIA_445_GCF_014198115.1_NZ_JACIGV010000051.1_c3865-5345	C	C	C	C	G	G	G	-	G	G	C	C	C	T	C	-	A	G	T	T	A	T	A	C	A	-	A	1	a	a
255	SEMIA_449	GCF_014198095.1	E	R._leguminosarum_SEMIA_449_GCF_014198095.1_NZ_JACIGX010000055.1_c4747-6227	C	C	C	C	G	G	G	-	G	G	C	C	C	T	C	-	A	G	T	T	A	T	A	C	A	-	A	1	a	a
256	SEMIA_485	GCF_014198735.1	E	R._leguminosarum_SEMIA_485_GCF_014198735.1_NZ_JACIIB010000046.1_c4747-6227	C	C	C	C	G	G	G	-	G	G	C	C	C	T	C	-	A	G	T	T	A	T	A	C	A	-	A	1	a	a
257	CZP1G1	GCF_004330915.1	E	R._leguminosarum_CZP1G1_GCF_004330915.1_NZ_SJNJ01000060.1_c4542-6022	C	C	C	C	G	G	G	-	G	G	C	C	C	T	C	-	A	G	T	T	A	T	A	C	A	-	A	1	a	a
258	SEP5D11	GCF_004329885.1	E	R._leguminosarum_SEP5D11_GCF_004329885.1_NZ_SJLX01000068.1_392-1872	C	C	C	C	G	G	G	-	G	G	C	C	C	T	C	-	A	G	T	T	A	T	A	C	A	-	A	1	a	a
259	FRP3E5	GCF_004330535.1	E	R._leguminosarum_FRP3E5_GCF_004330535.1_NZ_SJMS01000048.1_392-1872	C	C	C	C	G	G	G	-	G	G	C	C	C	T	C	-	A	G	T	T	A	T	A	C	A	-	A	1	a	a
260	UPM988	GCF_012275595.1	E	R._leguminosarum_UPM988_GCF_012275595.1_NZ_WIDS01000053.1_c4711-6191	C	C	C	C	G	G	G	-	G	G	C	C	C	T	C	-	A	G	T	T	A	T	A	C	A	-	A	1	a	a
261	128C53	GCF_000373425.1	E	R._leguminosarum_128C53_GCF_000373425.1																												0	0	0
262	UPM791	GCF_002948295.1	E	R._leguminosarum_UPM791_GCF_002948295.1_NZ_CP025509.1_c3412725-3414205	C	C	C	C	G	G	G	-	G	G	C	C	C	T	C	-	A	G	T	T	A	T	A	C	A	-	A	1	a	a
263	JHI1084	GCF_010668425.1	E	R._leguminosarum_JHI1084_GCF_010668425.1_NZ_WUFB01000067.1_392-1872	C	C	C	C	G	G	G	-	G	G	C	C	C	T	C	-	A	G	T	T	A	T	A	C	A	-	A	1	a	a
264	CC283b	GCF_000515375.1	E	R._leguminosarum_CC283b_NZ_KI911773.1:2375805-...-2378383_1-1481	C	C	C	C	G	G	G	-	G	G	C	C	C	T	C	-	A	G	T	T	A	T	A	C	A	-	A	1	a	a
265	4292	GCF_000379005.1	E	R._leguminosarum_4292_GCF_000379005.1_NZ_KB905373.1_c3102166-3103646	C	C	C	C	G	G	G	-	G	G	C	C	C	T	C	-	A	G	T	T	A	T	A	C	A	-	A	1	a	a
266	SEMIA_459	GCF_014198415.1	E	R._leguminosarum_SEMIA_459_GCF_014198415.1_NZ_JACIHO010000034.1_c4119-5599	C	C	C	C	G	G	G	-	G	G	C	C	C	T	C	-	A	G	T	T	A	T	A	C	A	-	A	1	a	a
267	SEMIA_463	GCF_014198545.1	E	R._leguminosarum_SEMIA_463_GCF_014198545.1_NZ_JACIHR010000034.1_c4119-5599	C	C	C	C	G	G	G	-	G	G	C	C	C	T	C	-	A	G	T	T	A	T	A	C	A	-	A	1	a	a
268	L125	GCF_012276315.1	E	R._leguminosarum_L125_GCF_012276315.1_NZ_WIEE01000043.1_392-1872	C	C	C	C	G	G	G	-	G	G	C	C	C	T	C	-	A	G	T	T	A	T	A	C	A	-	A	1	a	a
269	CZP1G9	GCF_004330865.1	E	R._leguminosarum_CZP1G9_GCF_004330865.1_NZ_SJNH01000048.1_c4119-5599	C	C	C	C	G	G	G	-	G	G	C	C	C	T	C	-	A	G	T	T	A	T	A	C	A	-	A	1	a	a
270	CZP1H7	GCF_004330855.1	E	R._leguminosarum_CZP1H7_GCF_004330855.1_NZ_SJNG01000053.1_392-1872	C	C	C	C	G	G	G	-	G	G	C	C	C	T	C	-	A	G	T	T	A	T	A	C	A	-	A	1	a	a
271	BIHB_1217	GCF_002243365.1	E	R._leguminosarum_BIHB_1217_GCF_002243365.1_NZ_CP022665.1_c2146838-2148318	C	C	C	C	G	G	G	-	G	G	C	C	C	T	C	-	A	G	T	T	A	T	A	C	A	-	A	1	a	a
272	FRP4D11	GCF_004330555.1	E	R._leguminosarum_FRP4D11_GCF_004330555.1_NZ_SJMQ01000041.1_392-1872	C	C	C	C	G	G	G	-	G	G	C	C	C	T	C	-	A	G	T	T	A	T	A	C	A	-	A	1	a	a
273	FRP5H7	GCF_004330185.1	E	R._leguminosarum_FRP5H7_GCF_004330185.1_NZ_SJML01000052.1_392-1872	C	C	C	C	G	G	G	-	G	G	C	C	C	T	C	-	A	G	T	T	A	T	A	C	A	-	A	1	a	a
274	L324	GCF_012276125.1	E	R._leguminosarum_L324_GCF_012276125.1_NZ_WIEC01000040.1_392-1872	C	C	C	C	G	G	G	-	G	G	C	C	C	T	C	-	A	G	T	T	A	T	A	C	A	-	A	1	a	a
275	CZP3C9	GCF_004330755.1	E	R._leguminosarum_CZP3C9_GCF_004330755.1_NZ_SJND01000045.1_392-1872	C	C	C	C	G	G	G	-	G	G	C	C	C	T	C	-	A	G	T	T	A	T	A	C	A	-	A	1	a	a
276	CZP3G7	GCF_004330735.1	E	R._leguminosarum_CZP3G7_GCF_004330735.1_NZ_SJNC01000051.1_c4747-6227	C	C	C	C	G	G	G	-	G	G	C	C	C	T	C	-	A	G	T	T	A	T	A	C	A	-	A	1	a	a
277	CZF1F8	GCF_004330935.1	E	R._leguminosarum_CZF1F8_GCF_004330935.1_NZ_SJNM01000049.1_392-1872	C	C	C	C	G	G	G	-	G	G	C	C	C	T	C	-	A	G	T	T	A	T	A	C	A	-	A	1	a	a
278	SRDI943	GCF_000372105.1	H	R._leguminosarum_SRDI943_GCF_000372105.1_NZ_AQUN01000001.1_c3327340-3328820	C	C	C	C	G	G	G	-	G	G	C	C	C	T	C	-	A	G	T	T	A	T	A	C	A	-	A	1	a	a
279	CB2179	GCF_004028055.1	H	R._leguminosarum_CB2179_GCF_004028055.1_NZ_SBHV01000215.1_c4883-6363	C	C	C	C	G	G	G	-	G	G	C	C	C	T	C	-	A	G	T	T	A	T	A	C	A	-	A	1	a	a
280	WSM409	GCF_004054165.1	H	R._leguminosarum_WSM409_GCF_004054165.1_NZ_SBJF01000028.1_392-1872	C	C	C	C	G	G	G	-	G	G	C	C	C	T	C	-	A	G	T	T	A	T	A	C	A	-	A	1	a	a
281	WSM1325	GCF_000023185.1	H	R._leguminosarum_WSM1325_GCF_000023185.1_NC_012850.1_c3464930-3466410	C	C	C	C	G	G	G	-	G	G	C	C	C	T	C	-	A	G	T	T	A	T	A	C	A	-	A	1	a	a
282	WSM1328	GCF_004054135.1	H	R._leguminosarum_WSM1328_GCF_004054135.1_NZ_SBJG01000017.1_392-1872	C	C	C	C	G	G	G	-	G	G	C	C	C	T	C	-	A	G	T	T	A	T	A	C	A	-	A	1	a	a
283	RCAM1365	GCA_014189635.1	A	R._leguminosarum_RCAM1365_GCA_014189635.1_CP050514.1_c4287780-4289260	C	C	C	C	G	G	G	-	G	G	C	C	C	T	C	-	A	G	T	T	A	T	A	C	A	-	A	1	a	a
284	WSM78	GCF_004054145.1	A	R._leguminosarum_WSM78_GCF_004054145.1_NZ_SBJE01000016.1_220486-221966	C	C	C	C	G	G	G	-	G	G	C	C	C	T	C	-	A	G	T	T	A	T	A	C	A	-	A	1	a	a
285	SM151A	GCF_004304175.1	A	gsA_R._leguminosarum_SM151A_GCF_004304175.1_NZ_SIPR01000040.1_54-1534	C	C	C	C	G	G	G	-	G	G	C	C	C	T	C	-	A	G	T	T	A	T	A	C	A	-	A	1	a	a
286	SM151B	GCF_004304085.1	A	gsA_R._leguminosarum_SM151B_GCF_004304085.1_NZ_SIPS01000015.1_54-1534	C	C	C	C	G	G	G	-	G	G	C	C	C	T	C	-	A	G	T	T	A	T	A	C	A	-	A	1	a	a
287	SM123	GCF_004304845.1	A	gsA_R._leguminosarum_SM123_GCF_004304845.1_NZ_SINY01000001.1_c3504152-3505632	C	C	C	C	G	G	G	-	G	G	C	C	C	T	C	-	A	G	T	T	A	T	A	C	A	-	A	1	a	a
288	SM154A	GCF_004303735.1	A	gsA_R._leguminosarum_SM154A_GCF_004303735.1_NZ_SIQA01000001.1_c3497254-3498734	C	C	C	C	G	G	G	-	G	G	C	C	C	T	C	-	A	G	T	T	A	T	A	C	A	-	A	1	a	a
289	SM154B	GCF_004303745.1	A	gsA_R._leguminosarum_SM154B_GCF_004303745.1_NZ_SIQB01000001.1_c3499366-3500846	C	C	C	C	G	G	G	-	G	G	C	C	C	T	C	-	A	G	T	T	A	T	A	C	A	-	A	1	a	a
290	SM146A	GCF_004303875.1	A	gsA_R._leguminosarum_SM146A_GCF_004303875.1_NZ_SIPF01000001.1_c3552468-3553948	C	C	C	C	G	G	G	-	G	G	C	C	C	T	C	-	A	G	T	T	A	T	A	C	A	-	A	1	a	a
291	9B	GCF_011604485.1	A	R._leguminosarum_9B_GCF_011604485.1_NZ_CP050097.1_c4782896-4784376	C	C	C	C	G	G	G	-	G	G	C	C	C	T	C	-	A	G	T	T	A	T	A	C	A	-	A	1	a	a
292	T88	GCF_013426935.1	A	R._leguminosarum_T88_GCF_013426935.1_NZ_JACDJD010000044.1_c4647-6127	C	C	C	C	G	G	G	-	G	G	C	C	C	T	C	-	A	G	T	T	A	T	A	C	A	-	A	1	a	a
293	SM131	GCF_004304285.1	A	gsA_R._leguminosarum_SM131_GCF_004304285.1_NZ_SIOI01000001.1_c3513764-3515244	C	C	C	C	G	G	G	-	G	G	C	C	C	T	C	-	A	G	T	T	A	T	A	C	A	-	A	1	a	a
294	SM128A	GCF_004304705.1	A	gsA_R._leguminosarum_SM128A_GCF_004304705.1_NZ_SIOD01000001.1_c4286261-4287741	C	C	C	C	G	G	G	-	G	G	C	C	C	T	C	-	A	G	T	T	A	T	A	C	A	-	A	1	a	a
295	SM128B	GCF_004304555.1	A	gsA_R._leguminosarum_SM128B_GCF_004304555.1_NZ_SIOE01000001.1_c4116381-4117861	C	C	C	C	G	G	G	-	G	G	C	C	C	T	C	-	A	G	T	T	A	T	A	C	A	-	A	1	a	a
296	SM138A	GCF_004304455.1	A	gsA_R._leguminosarum_SM138A_GCF_004304455.1_NZ_SIOT01000001.1_c3514842-3516322	C	C	C	C	G	G	G	-	G	G	C	C	C	T	C	-	A	G	T	T	A	T	A	C	A	-	A	1	a	a
297	CC275e	GCF_000769405.2	A	R._leguminosarum_CC275e_GCF_000769405.2_NZ_CP053439.1_c3527932-3529412	C	C	C	C	G	G	G	-	G	G	C	C	C	T	C	-	A	G	T	T	A	T	A	C	A	-	A	1	a	a
298	SM140B	GCF_004304635.1	A	gsA_R._leguminosarum_SM140B_GCF_004304635.1_NZ_SIOW01000001.1_c3526415-3527895	C	C	C	C	G	G	G	-	G	G	C	C	C	T	C	-	A	G	T	T	A	T	A	C	A	-	A	1	a	a
299	SM145C	GCF_004304065.1	A	gsA_R._leguminosarum_SM145C_GCF_004304065.1_NZ_SIPE01000001.1_c3615968-3617448	C	C	C	C	G	G	G	-	G	G	C	C	C	T	C	-	A	G	T	T	A	T	A	C	A	-	A	1	a	a
300	SM130B	GCF_004304475.1	A	gsA_R._leguminosarum_SM130B_GCF_004304475.1_NZ_SIOH01000001.1_c3858234-3859714	C	C	C	C	G	G	G	-	G	G	C	C	C	T	C	-	A	G	T	T	A	T	A	C	A	-	A	1	a	a
301	SM155B	GCF_004303535.1	A	gsA_R._leguminosarum_SM155B_GCF_004303535.1_NZ_SIQE01000001.1_c3558169-3559649	C	C	C	C	G	G	G	-	G	G	C	C	C	T	C	-	A	G	T	T	A	T	A	C	A	-	A	1	a	a
302	SM155A	GCF_004303465.1	A	gsA_R._leguminosarum_SM155A_GCF_004303465.1_NZ_SIQD01000001.1_c3709201-3710681	C	C	C	C	G	G	G	-	G	G	C	C	C	T	C	-	A	G	T	T	A	T	A	C	A	-	A	1	a	a
303	SM155C	GCF_004303655.1	A	gsA_R._leguminosarum_SM155C_GCF_004303655.1_NZ_SIQF01000001.1_c3849774-3851254	C	C	C	C	G	G	G	-	G	G	C	C	C	T	C	-	A	G	T	T	A	T	A	C	A	-	A	1	a	a
304	SM140A	GCF_004304355.1	A	gsA_R._leguminosarum_SM140A_GCF_004304355.1_NZ_SIOV01000001.1_2197133-2198613	C	C	C	C	G	G	G	-	G	G	C	C	C	T	C	-	A	G	T	T	A	T	A	T	A	-	A	12	b	b
305	SM146B	GCF_004303835.1	A	gsA_R._leguminosarum_SM146B_GCF_004303835.1_NZ_SIPG01000001.1_c3546002-3547482	C	C	C	C	G	G	G	-	G	G	C	C	C	T	C	-	A	G	T	T	A	T	A	T	A	-	A	12	b	b
306	SM130A	GCF_004304365.1	A	gsA_R._leguminosarum_SM130A_GCF_004304365.1_NZ_SIOG01000001.1_4047709-4049189	C	C	C	C	G	G	G	-	G	G	C	C	C	T	C	-	A	G	T	T	A	T	A	T	A	-	A	12	b	b
307	SM163A	GCF_004303275.1	A	gsA_R._leguminosarum_SM163A_GCF_004303275.1_NZ_SIQN01000001.1_c3653609-3655089	C	C	C	C	G	G	G	-	G	G	C	C	C	T	C	-	A	G	T	T	A	T	A	T	A	-	A	12	b	b
308	SM136A	GCF_004304335.1	A	gsA_R._leguminosarum_SM136A_GCF_004304335.1_NZ_SIOQ01000001.1_c3495109-3496589	C	C	C	C	G	G	G	-	G	G	C	C	C	T	C	-	A	G	T	T	A	T	A	T	A	-	A	12	b	b
309	SM154C	GCF_004303365.1	A	gsA_R._leguminosarum_SM154C_GCF_004303365.1_NZ_SIQC01000014.1_66-1546	C	C	C	C	G	G	G	-	G	G	C	C	C	T	C	-	A	G	T	T	A	T	A	C	A	-	A	1	a	a
310	SM163B	GCF_004303255.1	A	gsA_R._leguminosarum_SM163B_GCF_004303255.1_NZ_SIQO01000001.1_c3527059-3528539	C	C	C	C	G	G	G	-	G	G	C	C	C	T	C	-	A	G	T	T	A	T	A	C	A	-	A	1	a	a
311	SM145A	GCF_004304245.1	A	gsA_R._leguminosarum_SM145A_GCF_004304245.1_NZ_SIPC01000001.1_c3468497-3469977	C	C	C	C	G	G	G	-	G	G	C	C	C	T	C	-	A	G	T	T	A	T	A	C	A	-	A	1	a	a
312	SM144B	GCF_004303975.1	A	gsA_R._leguminosarum_SM144B_GCF_004303975.1_NZ_SIPB01000001.1_c3336205-3337685	C	C	C	C	G	G	G	-	G	G	C	C	C	T	C	-	A	G	T	T	A	T	A	C	A	-	A	1	a	a
313	SM138B	GCF_004304385.1	A	gsA_R._leguminosarum_SM138B_GCF_004304385.1_NZ_SIOU01000001.1_c3724159-3725639	C	C	C	C	G	G	G	-	G	G	C	C	C	T	C	-	A	G	T	T	A	T	A	C	A	-	A	1	a	a
314	SM144A	GCF_004303625.1	A	gsA_R._leguminosarum_SM144A_GCF_004303625.1_NZ_SIPA01000001.1_c3674099-3675579	C	C	C	C	G	G	G	-	G	G	C	C	C	T	C	-	A	G	T	T	A	T	A	C	A	-	A	1	a	a
315	SM137B	GCF_004304535.1	A	gsA_R._leguminosarum_SM137B_GCF_004304535.1_NZ_SIOS01000001.1_c3404685-3406165	C	C	C	C	G	G	G	-	G	G	C	C	C	T	C	-	A	G	T	T	A	T	A	C	A	-	A	1	a	a
316	SM145B	GCF_004303985.1	A	gsA_R._leguminosarum_SM145B_GCF_004303985.1_NZ_SIPD01000001.1_c3514896-3516376	C	C	C	C	G	G	G	-	T	G	C	C	C	T	C	-	A	G	T	T	A	T	A	C	A	-	A	26	a	a
317	SM152A	GCF_004303715.1	A	gsA_R._leguminosarum_SM152A_GCF_004303715.1_NZ_SIPU01000001.1_c3530309-3531789	C	C	C	C	G	G	G	-	G	G	C	C	C	T	C	-	A	G	T	T	A	T	A	C	A	-	A	1	a	a
318	SM152B	GCF_004303755.1	A	gsA_R._leguminosarum_SM152B_GCF_004303755.1_NZ_SIPV01000001.1_c3492547-3494027	C	C	C	C	G	G	G	-	G	G	C	C	C	T	C	-	A	G	T	T	A	T	A	C	A	-	A	1	a	a
319	SM152C	GCF_004303945.1	A	gsA_R._leguminosarum_SM152C_GCF_004303945.1_NZ_SIPW01000001.1_c3538020-3539500	C	C	C	C	G	G	G	-	G	G	C	C	C	T	C	-	A	G	T	T	A	T	A	C	A	-	A	1	a	a
320	WYCCWR10014	GCF_001657485.1	unique	R._sp._WYCCWR10014_WYCCWR10014_GCF_001657485.1_NZ_LXFU01000011.1_c4778-6258	C	C	C	C	G	G	G	-	G	G	C	C	C	T	C	-	A	G	T	T	A	T	A	C	A	-	A	1	a	a
321	Tri-43	GCF_004123835.1	unique	R._leguminosarum_Tri-43_GCF_004123835.1_NZ_MZMU01000006.1_393-1873	C	C	C	C	G	G	G	-	G	G	C	C	C	T	C	-	A	G	T	T	A	T	A	G	A	-	A	14	d	d
322	CCBAU11080	GCF_012276545.1	G	R._leguminosarum_CCBAU11080_GCF_012276545.1_NZ_WIEN01000051.1_66-1546	C	C	C	C	G	G	G	-	G	G	C	C	C	T	C	-	A	G	T	T	A	T	A	C	A	-	A	1	a	a
323	CCBAU33195	GCF_012276535.1	G	R._leguminosarum_CCBAU33195_GCF_012276535.1_NZ_WIEM01000081.1_c4492-5972	C	C	C	C	G	G	G	-	G	G	C	C	C	T	C	-	A	G	T	T	A	T	A	C	A	-	A	1	a	a
324	CCBAU_03386	GCF_013087515.1	G	R._sophorae_CCBAU_03386_GCF_013087515.1_NZ_JABFCN010000087.1_c4432-5912	C	C	C	C	G	G	G	-	G	G	C	C	C	T	C	-	A	G	T	T	A	T	A	C	A	-	A	1	a	a
325	WYCCWR11317	GCF_014050125.1	S	R._sp._WYCCWR11317_GCF_014050125.1_NZ_JACGBJ010000034.1_392-1872	C	C	C	C	G	G	G	-	G	G	C	C	C	T	C	-	A	G	T	T	A	T	A	T	G	-	A	25	k	k
326	WYCCWR_11279	GCF_013087625.1	S	R._sp._WYCCWR_11279_WYCCWR_11279_GCF_013087625.1_NZ_JABFCQ010000014.1_c4479-5959	C	C	C	C	G	G	G	-	G	G	C	C	C	T	C	-	A	G	T	T	A	T	A	A	A	-	A	13	c	c
327	WYCCWR_11290	GCF_013426945.1	S	R._sp._WYCCWR_11290_WYCCWR_11290_GCF_013426945.1_NZ_JACCPJ010000023.1_74-1554	C	C	C	C	G	G	G	-	G	G	C	C	C	T	C	-	A	G	T	T	A	T	A	T	G	-	A	25	k	k
328	JKLM12A2	GCF_005862305.2	I	R._sp._JKLM12A2_JKLM12A2_GCF_005862305.2_NZ_CP054021.1_3198673-3200154	C	C	C	C	G	G	G	-	G	G	C	C	C	T	C	G	A	G	T	T	A	T	A	C	A	-	A	24	a	a
329	WYCCWR_11128	GCF_013416305.1	I	R._sp._WYCCWR_11128_WYCCWR_11128_GCF_013416305.1_NZ_JACCEZ010000024.1_c4087-5567	C	C	C	C	G	G	G	-	G	G	C	C	C	T	C	-	A	G	T	T	A	T	A	C	A	-	A	1	a	a
330	WYCCWR_11146	GCA_013591995.1	I	R._sp._WYCCWR_11146_WYCCWR_11146_GCA_013591995.1_JACCEY010000034.1_c4295-5775	C	C	C	C	G	G	G	-	G	G	C	C	C	T	C	-	A	G	T	T	A	T	A	A	A	-	A	13	c	c
331	JKLM13E	GCF_005860925.2	I	R._sp._JKLM13E_JKLM13E_GCF_005860925.2_NZ_CP054031.1_3684116-3685596	C	C	C	C	G	G	G	-	G	G	C	C	C	T	C	-	A	G	T	T	A	T	A	A	A	-	A	13	c	c
332	WYCCWR_11152	GCF_013087615.1	I	R._sp._WYCCWR_11152_WYCCWR_11152_GCF_013087615.1_NZ_JABFCP010000033.1_c4189-5669	C	C	C	C	G	G	G	-	G	G	C	C	C	T	C	-	A	G	T	T	A	T	A	C	A	-	A	1	a	a
333	HP3	GCF_012276365.1	Q	R._laguerreae_HP3_GCF_012276365.1_NZ_WIFK01000058.1_c4362-5842	C	C	C	C	G	G	G	-	G	G	C	C	C	T	C	-	A	G	T	T	A	C	G	C	A	-	A	4	e	e
334	SPF2A11	GCF_004329805.1	Q	R._laguerreae_SPF2A11_GCF_004329805.1_NZ_SJNQ01000049.1_390-1870	C	C	C	C	G	G	G	-	G	G	C	C	C	T	C	-	A	G	T	T	A	C	G	C	A	-	A	4	e	e
335	248	GCF_010365265.1	Q	R._leguminosarum_248_GCF_010365265.1_NZ_CP048280.1_c3705882-3707512	C	C	C	C	G	G	G	G	G	G	C	C	C	T	C	-	A	G	T	T	A	C	G	G	A	-	A	11	h	h
336	L241	GCF_012276195.1	Q	R._leguminosarum_L241_L241_16S_2-1482	C	C	C	C	G	G	G	-	G	G	C	C	C	T	C	-	A	G	T	T	A	C	G	G	A	-	A	6	f	f
337	GLR17	GCF_012276335.1	Q	R._leguminosarum_GLR17_GCF_012276335.1_NZ_WIFC01000080.1_c4611-6218*	C	C	C	C	G	G	G	G	G	G	C	C	C	T	C	-	A	G	T	T	A	C	G	G	A	-	A	11	h	h
338	GLR2	GCF_012276355.1	Q	R._leguminosarum_GLR2_GCF_012276355.1_NZ_WIFB01000060.1_c186-1793*	C	C	C	C	G	G	G	A	G	G	C	C	C	T	C	-	A	G	T	T	A	C	G	C	A	-	A	16	i	i
339	L144	GCF_012276225.1	Q	R._leguminosarum_L144_GCF_012276225.1_NZ_WIEY01000015.1_c847-2327	C	C	C	C	G	G	G	-	G	G	C	C	C	T	C	-	A	G	T	T	A	C	G	C	A	-	A	4	e	e
340	L353	GCF_012276115.1	Q	R._leguminosarum_L353_GCF_012276115.1_NZ_WIEU01000046.1_377-1857	G	T	A	C	T	A	C	-	G	G	C	C	C	T	C	-	A	G	T	T	A	C	G	C	A	-	A	17	m	m
341	WSM1689	GCF_000517605.1	unique	R._leguminosarum_WSM1689_GCF_000517605.1_NZ_CP007045.1_c3582054-3583534	C	C	C	C	G	G	G	-	G	G	C	C	C	T	C	-	A	G	T	T	A	T	A	C	A	-	A	1	a	a
342	CCBAU10279	GCF_012276585.1	unique	R._laguerreae_CCBAU10279_GCF_012276585.1_NZ_WIFN01000069.1_c92-1572	C	C	C	C	G	G	G	-	G	G	C	C	C	T	C	-	A	G	T	T	A	C	G	C	A	-	A	4	e	e
343	CL8	GCF_012276455.1	R	R._laguerreae_CL8_GCF_012276455.1_NZ_WIFL01000038.1_391-1871	C	C	C	C	G	G	G	-	G	G	C	C	C	T	C	-	A	G	T	T	A	C	G	C	A	-	A	4	e	e
344	FB403	GCF_004346285.1	R	R._laguerreae_FB403_GCF_004346285.1_NZ_SMBI01000054.1_c*1-945	C	C	C	C	G	G	G	-	G	G	C	C	C	T	C	-	A	G	T	T	-	-	-	-	-	-	-	5	0	0
345	SS21	GCF_012275795.1	R	R._laguerreae_SS21_GCF_012275795.1_NZ_WIFE01000038.1_391-1871	C	C	C	C	G	G	G	-	G	G	C	C	C	T	C	-	A	G	T	T	A	C	G	C	A	-	A	4	e	e
346	OS25	GCF_012276015.1	R	R._laguerreae_OS25_GCF_012276015.1_NZ_WIFI01000041.1_391-1871	C	C	C	C	G	G	G	-	G	G	C	C	C	T	C	-	A	G	T	T	A	C	G	C	A	-	A	4	e	e
347	OL29	GCF_012275995.1	R	R._laguerreae_OL29_GCF_012275995.1_NZ_WIFJ01000073.1_391-1871	C	C	C	C	G	G	G	-	G	G	C	C	C	T	C	-	A	G	T	T	A	C	G	C	A	-	A	4	e	e
348	SL16	GCF_012275885.1	R	R._laguerreae_SL16_GCF_012275885.1_NZ_WIFH01000041.1_c4117-5597	C	C	C	C	G	G	G	-	G	G	C	C	C	T	C	-	A	G	T	T	A	C	G	C	A	-	A	4	e	e
349	SP4	GCF_012275785.1	R	R._laguerreae_SP4_R._laguerreae_SP4_16S_1-1439*	C	C	C	C	G	G	G	-	G	G	C	C	C	T	C	-	A	G	T	T	-	-	N	C	A	-	A	8	0	0
350	FB206	GCF_002008165.1	R	R._laguerreae_FB206_GCF_002008165.1_NZ_MRDM01000018.1_c186-1666	C	C	C	C	G	G	G	-	G	G	C	C	C	T	C	-	A	G	T	T	A	T	A	C	A	-	A	1	a	a
351	SPF2F4	GCF_004329785.1	R	R._laguerreae_SPF2F4_GCF_004329785.1_NZ_SJNP01000047.1_391-1871	C	C	C	C	G	G	G	-	G	G	C	C	C	T	C	-	A	G	T	T	G	C	G	C	A	-	A	9	e	e
352	SPF4F7	GCF_004329795.1	R	R._laguerreae_SPF4F7_GCF_004329795.1_NZ_SJNO01000037.1_c4084-5564	C	C	C	C	G	G	G	-	G	G	C	C	C	T	C	-	A	G	T	T	A	C	G	C	A	-	A	4	e	e
353	HUTR05	GCF_013004195.1	R	R._laguerreae_HUTR05_GCF_013004195.1_NZ_JABEQX010000024.1_c4580-6060	C	C	C	C	G	G	G	-	G	G	C	C	C	T	C	-	A	G	T	T	A	C	G	C	A	-	A	4	e	e
354	SP15	GCF_012275855.1	R	R._laguerreae_SP15_GCF_012275855.1_NZ_WIFG01000052.1_c4485-5965	C	C	C	C	G	G	G	-	G	G	C	C	C	T	C	-	A	G	T	T	A	C	G	C	A	-	A	4	e	e
355	Vaf-108	GCF_001890425.1	P	R._leguminosarum_Vaf-108_GCF_001890425.1_NZ_CP018228.1_78647-80277	C	C	C	C	G	G	G	A	G	G	C	C	C	T	C	-	A	G	T	T	A	C	G	C	A	-	A	16	i	i
356	Vaf10	GCF_001679785.1	P	R._leguminosarum_Vaf10_GCF_001679785.1_NZ_CP016286.1_c3156616-3158096	C	C	C	C	G	G	G	-	G	G	C	C	C	T	C	-	A	G	T	T	A	C	G	G	A	-	A	6	f	f
357	L411	GCF_012275615.1	O	R._leguminosarum_L411_GCF_012275615.1_NZ_WIER01000050.1_301-1931	C	C	C	C	G	G	G	G	G	G	C	C	C	T	C	-	A	G	T	T	A	C	G	C	A	-	A	7	g	g
358	UPM1131	GCF_000427945.1	O	R._leguminosarum_UPM1131_GCF_000427945.1_NZ_ATYZ01000039.1_372-2002	C	C	C	C	G	G	G	G	G	G	C	C	C	T	C	-	A	G	T	T	A	T	A	C	A	-	A	21	p	p
359	JHI2449	GCF_010668165.1	O	R._laguerreae_JHI2449_GCF_010668165.1_NZ_WUEP01000075.1_c106-1736	C	C	C	C	G	G	G	G	G	G	C	C	C	T	C	-	A	G	T	T	A	C	G	C	A	-	A	7	g	g
360	L563	GCF_012276025.1	O	R._leguminosarum_L563_GCF_012276025.1_NZ_WIEQ01000060.1_54-1534	C	C	C	C	G	G	G	-	G	G	C	C	C	T	C	-	A	G	T	T	A	C	G	C	A	-	A	4	e	e
361	L244	GCF_012276155.1	O	R._leguminosarum_L244_GCF_012276155.1_NZ_WIEV01000162.1_c4641-6271	C	C	C	C	G	G	G	G	G	G	C	C	C	T	C	-	A	G	T	T	A	C	G	C	A	-	A	7	g	g
362	L231	GCF_012276175.1	O	R._leguminosarum_L231_GCF_012276175.1_NZ_WIEX01000070.1_c4641-6271	C	C	C	C	G	G	G	G	G	G	C	C	C	T	C	-	A	G	T	T	A	C	G	C	A	-	A	7	g	g
363	L361	GCF_012276075.1	O	R._leguminosarum_L361_GCF_012276075.1_NZ_WIET01000066.1_299-1929	C	C	C	C	G	G	G	G	G	G	C	C	C	T	C	-	A	G	T	T	A	C	G	C	A	-	A	7	g	g
364	L364	GCF_012276085.1	O	R._leguminosarum_L364_GCF_012276085.1_NZ_WIES01000048.1_211-1841	C	C	C	C	G	G	G	G	G	G	C	C	C	T	C	-	A	G	T	T	A	C	G	C	A	-	A	7	g	g
365	RSP1A1	GCF_004330105.1	N	R._leguminosarum_RSP1A1_GCF_004330105.1_NZ_SJMI01000057.1_c4293-5773	C	C	C	C	G	G	G	-	G	G	C	C	C	T	C	-	A	G	T	T	A	T	A	A	A	-	A	13	c	c
366	FRF1D12	GCF_004330655.1	N	R._leguminosarum_FRF1D12_GCF_004330655.1_NZ_SJMY01000045.1_430-1910	C	C	C	C	G	G	G	-	G	G	C	C	C	T	C	-	A	G	T	T	A	T	A	G	A	-	A	14	d	d
367	L141	GCF_012276275.1	N	R._leguminosarum_L141_GCF_012276275.1_NZ_WIFA01000034.1_c4536-6016	C	C	C	C	G	G	G	-	G	G	C	C	C	T	C	-	A	G	T	T	A	T	A	G	A	-	A	14	d	d
368	RSF1B9	GCF_004330175.1	N	R._leguminosarum_RSF1B9_GCF_004330175.1_NZ_SJMK01000036.1_375-1855	C	C	C	C	G	G	G	-	G	G	C	C	C	T	C	-	A	G	T	T	A	T	A	G	A	-	A	14	d	d
369	RSP1F2	GCF_004330005.1	N	R._leguminosarum_RSP1F2_GCF_004330005.1_NZ_SJME01000041.1_375-1855	C	C	C	C	G	G	G	-	G	G	C	C	C	T	C	-	A	G	T	T	A	T	A	A	A	-	A	13	c	c
370	L143	GCF_012276245.1	N	R._leguminosarum_L143_GCF_012276245.1_NZ_WIEZ01000005.1_c205-1685	C	C	C	C	G	G	G	-	G	G	C	C	C	T	C	-	A	G	T	T	A	T	A	G	A	-	A	14	d	d
371	PEPV16	GCF_008919455.1	N	R._sp._PEPV16_PEPV16_GCF_008919455.1_NZ_VSZV01000330.1_c17372-18852	C	C	C	C	G	G	G	-	G	G	C	C	C	T	C	-	A	G	T	T	A	T	A	A	A	-	A	13	c	c
372	TOM	GCF_000372205.1	N	R._leguminosarum_TOM_GCF_000372205.1_NZ_AQUC01000006.1_c3585896-3587376	C	C	C	C	G	G	G	-	G	G	C	C	C	T	C	-	A	G	T	T	A	T	A	G	A	-	A	14	d	d
373	CCBAU83268	GCF_012276475.1	N	R._leguminosarum_CCBAU83268_GCF_012276475.1_NZ_WIFD01000081.1_c1256-2736	C	C	C	C	G	G	G	-	G	G	C	C	C	T	C	-	A	G	T	T	A	T	A	G	A	-	A	14	d	d
374	BIHB_1148	GCF_002240185.1	N	R._leguminosarum_BIHB_1148_GCF_002240185.1_NZ_CP022564.1_c3127189-3128669	C	C	C	C	G	G	G	-	G	G	C	C	C	T	C	-	A	G	T	T	A	T	A	G	A	-	A	14	d	d
375	RSP1F10	GCF_004330075.1	N	R._leguminosarum_RSP1F10_GCF_004330075.1_NZ_SJMF01000055.1_432-1912	C	C	C	C	G	G	G	-	G	G	C	C	C	T	C	-	A	G	T	T	A	T	A	G	A	-	A	14	d	d
376	FWPou15	GCF_013391685.1	N	R._leguminosarum_FWPou15_GCF_013391685.1_NZ_JACBGR010000051.1_391-1871	C	C	C	C	G	G	G	-	G	G	C	C	C	T	C	-	A	G	T	T	A	T	A	C	A	-	A	1	a	a
377	FWPou32	GCF_013391665.1	N	R._leguminosarum_FWPou32_GCF_013391665.1_NZ_JACBGQ010000042.1_391-1871	C	C	C	C	G	G	G	-	G	G	C	C	C	T	C	-	A	G	T	T	A	T	A	C	A	-	A	1	a	a
378	FWPou38	GCF_013391705.1	N	R._leguminosarum_FWPou38_GCF_013391705.1_NZ_JACBGP010000042.1_391-1871	C	C	C	C	G	G	G	-	G	G	C	C	C	T	C	-	A	G	T	T	A	T	A	C	A	-	A	1	a	a
379	Vaf12	GCF_001612535.1	unique	R._leguminosarum_Vaf12_GCF_001612535.1_NZ_LVYU01000079.1_c97995-99475	G	T	G	T	C	A	C	-	G	G	C	C	C	T	C	-	A	G	T	T	A	T	A	C	A	-	A	22	q	q
380	JHI10	GCF_010668925.1	K	R._leguminosarum_JHI10_GCF_010668925.1_NZ_WUFZ01000044.1_389-1869	C	C	C	C	G	G	G	-	G	G	C	C	C	T	C	-	A	G	T	T	A	T	A	C	A	-	A	1	a	a
381	JHI2450	GCF_010668125.1	K	R._leguminosarum_JHI2450_GCF_010668125.1_NZ_WUEO01000044.1_c4294-5774	C	C	C	C	G	G	G	-	G	G	C	C	C	T	C	-	A	G	T	T	A	T	A	C	A	-	A	1	a	a
382	JHI54	GCF_010668875.1	K	R._leguminosarum_JHI54_GCF_010668875.1_NZ_WUFV01000075.1_391-1871	C	C	C	C	G	G	G	-	G	G	C	C	C	T	C	-	A	G	T	T	A	T	A	C	A	-	A	1	a	a
383	FA23	GCF_000419705.1	K	R._leguminosarum_FA23_GCF_000419705.1_NZ_ATTN01000051.1_*1-1276	-	-	-	-	-	-	-	-	-	G	C	C	C	T	C	-	A	G	T	T	A	T	A	C	A	-	A	15	0	0
384	JHI2451	GCF_010668065.1	K	R._leguminosarum_JHI2451_GCF_010668065.1_NZ_WUEN01000034.1_c4587-6067	C	C	C	C	G	G	G	-	G	G	C	C	C	T	C	-	A	G	T	T	A	T	A	C	A	-	A	1	a	a
385	WSM1455	GCF_000271805.1	J	R._leguminosarum_WSM1455_GCF_000271805.1_NZ_JH719384.1_c2411473-2412953	C	C	C	C	G	G	G	-	G	G	C	C	C	T	C	-	A	G	T	T	A	T	A	G	A	-	A	14	d	d
386	WSM1481	GCF_000372305.1	J	R._leguminosarum_WSM1481_GCF_000372305.1_NZ_AQUM01000001.1_c1816571-1818051	G	T	A	C	T	A	C	-	G	G	C	C	C	T	C	-	A	G	T	T	A	T	A	G	A	-	A	23	r	r
387	SM12	GCF_004306015.1	B	gsB_R._leguminosarum_SM12_GCF_004306015.1_NZ_SIJY01000001.1_c3939140-3940620	C	C	C	C	G	G	G	-	G	G	C	C	C	T	C	-	A	G	T	T	A	T	A	T	A	-	A	12	b	b
388	P1NP2K	GCF_012275875.1	B	R._leguminosarum_P1NP2K_GCF_012275875.1_NZ_WIDW01000038.1_c4719-6199	C	C	C	C	G	G	G	-	G	G	C	C	C	T	C	-	A	G	T	T	A	T	A	T	A	-	A	12	b	b
389	RSP1E6	GCF_004330085.1	B	R._leguminosarum_RSP1E6_GCF_004330085.1_NZ_SJMG01000057.1_488-1968	C	C	C	C	G	G	G	-	G	G	C	C	C	T	C	-	A	G	T	T	A	T	A	T	A	-	A	12	b	b
390	VF39	GCF_000427765.1	B	R._leguminosarum_VF39_GCF_000427765.1_NZ_ATYQ01000059.1_448-1928	C	C	C	C	G	G	G	-	G	G	C	C	C	T	C	-	A	G	T	T	A	T	A	T	A	-	A	12	b	b
391	SM32	GCF_004322915.1	B	gsB_R._leguminosarum_SM32_GCF_004322915.1_NZ_SIKO01000001.1_c3585320-3586800	C	C	C	C	G	G	G	-	G	G	C	C	C	T	C	-	A	G	T	T	A	T	A	T	A	-	A	12	b	b
392	SM17	GCF_004306885.1	B	gsB_R._leguminosarum_SM17_GCF_004306885.1_NZ_SIKD01000001.1_c3640107-3641587	C	C	C	C	G	G	G	-	G	G	C	C	C	T	C	-	A	G	T	T	A	T	A	T	A	-	A	12	b	b
393	SM7	GCF_004307195.1	B	gsB_R._leguminosarum_SM7_GCF_004307195.1_NZ_SIJU01000001.1_3023297-3024777	C	C	C	C	G	G	G	-	G	G	C	C	C	T	C	-	A	G	T	T	A	T	A	T	A	-	A	12	b	b
394	SM11	GCF_004306915.1	B	gsB_R._leguminosarum_SM11_GCF_004306915.1_NZ_SIJX01000001.1_c3689393-3690873	C	C	C	C	G	G	G	-	G	G	C	C	C	T	C	-	A	G	T	T	A	T	A	T	A	-	A	12	b	b
395	SM9	GCF_004307185.1	B	gsB_R._leguminosarum_SM9_GCF_004307185.1_NZ_SIJV01000001.1_c4071635-4073115	C	C	C	C	G	G	G	-	G	G	C	C	C	T	C	-	A	G	T	T	A	T	A	T	A	-	A	12	b	b
396	SM13	GCF_004307165.1	B	gsB_R._leguminosarum_SM13_GCF_004307165.1_NZ_SIJZ01000001.1_c3781451-3782931	C	C	C	C	G	G	G	-	G	G	C	C	C	T	C	-	A	G	T	T	A	T	A	T	A	-	A	12	b	b
397	SM34	GCF_004306605.1	B	gsB_R._leguminosarum_SM34_GCF_004306605.1_NZ_SIKP01000001.1_c3821279-3822759	C	C	C	C	G	G	G	-	G	G	C	C	C	T	C	-	A	G	T	T	A	T	A	T	A	-	A	12	b	b
398	SM3	GCF_004307125.1	B	gsB_R._leguminosarum_SM3_GCF_004307125.1_NZ_SIJQ01000001.1_c3711958-3713438	C	C	C	C	G	G	G	-	G	G	C	C	C	T	C	-	A	G	T	T	A	T	A	T	A	-	A	12	b	b
399	CCBAU03058	GCF_012276615.1	B	R._leguminosarum_CCBAU03058_GCF_012276615.1_NZ_WIEO01000104.1_394-1874	C	C	C	C	G	G	G	-	G	G	C	C	C	T	C	-	A	G	T	T	A	T	A	T	A	-	A	12	b	b
400	CCBAU65264	GCF_012276485.1	B	R._leguminosarum_CCBAU65264_GCF_012276485.1_NZ_WIEL01000075.1_434-1914	C	C	C	C	G	G	G	-	G	G	C	C	C	T	C	-	A	G	T	T	A	T	A	T	A	-	A	12	b	b
401	SEMIA_475	GCF_014198665.1	B	R._leguminosarum_SEMIA_475_GCF_014198665.1_NZ_JACIHW010000037.1_448-1928	C	C	C	C	G	G	G	-	G	G	C	C	C	T	C	-	A	G	T	T	A	T	A	T	A	-	A	12	b	b
402	JHI973	GCF_010668505.1	B	R._leguminosarum_JHI973_GCF_010668505.1_NZ_WUFF01000032.1_448-1928	C	C	C	C	G	G	G	-	G	G	C	C	C	T	C	-	A	G	T	T	A	T	A	T	A	-	A	12	b	b
403	JHI974	GCF_010668475.1	B	R._leguminosarum_JHI974_GCF_010668475.1_NZ_WUFE01000032.1_448-1928	C	C	C	C	G	G	G	-	G	G	C	C	C	T	C	-	A	G	T	T	A	T	A	T	A	-	A	12	b	b
404	SM4	GCF_004307035.1	B	gsB_R._leguminosarum_SM4_GCF_004307035.1_NZ_SIJR01000001.1_c3776333-3777813	C	C	C	C	G	G	G	-	G	G	C	C	C	T	C	-	A	G	T	T	A	T	A	T	A	-	A	12	b	b
405	22B	GCF_011604525.1	B	R._leguminosarum_22B_GCF_011604525.1_NZ_CP050091.1_4132170-4133651	C	C	C	C	G	G	G	-	G	G	C	C	C	T	C	-	A	G	T	T	A	T	A	T	A	G	A	10	b	b
406	JHI13	GCF_010668945.1	B	R._leguminosarum_JHI13_GCF_010668945.1_NZ_WUFY01000047.1_448-1928	C	C	C	C	G	G	G	-	G	G	C	C	C	T	C	-	A	G	T	T	A	T	A	T	A	-	A	12	b	b
407	SM36	GCF_004306655.1	B	gsB_R._leguminosarum_SM36_GCF_004306655.1_NZ_SIKR01000001.1_c3762570-3764050	C	C	C	C	G	G	G	-	G	G	C	C	C	T	C	-	A	G	T	T	A	T	A	T	A	-	A	12	b	b
408	JHI1415	GCF_010668265.1	B	R._leguminosarum_JHI1415_GCF_010668265.1_NZ_WUEV01000027.1_c4845-6325	C	C	C	C	G	G	G	-	G	G	C	C	C	T	C	-	A	G	T	T	A	T	A	T	A	-	A	12	b	b
409	JHI535	GCF_010668705.1	B	R._leguminosarum_JHI535_GCF_010668705.1_NZ_WUFP01000025.1_394-1874	C	C	C	C	G	G	G	-	G	G	C	C	C	T	C	-	A	G	T	T	A	T	A	T	A	-	A	12	b	b
410	JHI585	GCF_010668715.1	B	R._leguminosarum_JHI585_GCF_010668715.1_NZ_WUFO01000028.1_394-1874	C	C	C	C	G	G	G	-	G	G	C	C	C	T	C	-	A	G	T	T	A	T	A	T	A	-	A	12	b	b
411	JHI1600	GCF_010668195.1	B	R._leguminosarum_JHI1600_GCF_010668195.1_NZ_WUEQ01000025.1_394-1874	C	C	C	C	G	G	G	-	G	G	C	C	C	T	C	-	A	G	T	T	A	T	A	T	A	-	A	12	b	b
412	JHI1587	GCF_010668175.1	B	R._leguminosarum_JHI1587_GCF_010668175.1_NZ_WUES01000038.1_394-1874	C	C	C	C	G	G	G	-	G	G	C	C	C	T	C	-	A	G	T	T	A	T	A	T	A	-	A	12	b	b
413	P1NP1J	GCF_012275665.1	B	R._leguminosarum_P1NP1J_GCF_012275665.1_NZ_WIDY01000036.1_c4721-6201	C	C	C	C	G	G	G	-	G	G	C	C	C	T	C	-	A	G	T	T	A	T	A	T	A	-	A	12	b	b
414	P1NP2H	GCF_012275945.1	B	R._leguminosarum_P1NP2H_GCF_012275945.1_NZ_WIDX01000044.1_c4721-6201	C	C	C	C	G	G	G	-	G	G	C	C	C	T	C	-	A	G	T	T	A	T	A	T	A	-	A	12	b	b
415	RSF2G1	GCF_004330135.1	B	R._leguminosarum_RSF2G1_GCF_004330135.1_NZ_SJMJ01000039.1_394-1874	C	C	C	C	G	G	G	-	G	G	C	C	C	T	C	-	A	G	T	T	A	T	A	T	A	-	G	20	j	j
416	SPF4F3	GCF_004329775.1	B	R._leguminosarum_SPF4F3_GCF_004329775.1_NZ_SJLU01000050.1_394-1874	C	C	C	C	G	G	G	-	G	G	C	C	C	T	C	-	A	G	T	T	A	T	A	T	A	-	G	20	j	j
417	SM22	GCF_004306805.1	B	gsB_R._leguminosarum_SM22_GCF_004306805.1_NZ_SIKI01000001.1_c3599751-3601231	C	C	C	C	G	G	G	-	G	G	C	C	C	T	C	-	A	G	T	T	A	T	A	T	A	-	A	12	b	b
418	SM39	GCF_004306715.1	B	gsB_R._leguminosarum_SM39_GCF_004306715.1_NZ_SIKU01000001.1_c3594031-3595511	C	C	C	C	G	G	G	-	G	G	C	C	C	T	C	-	A	G	T	T	A	T	A	T	A	-	A	12	b	b
419	SM20	GCF_004305945.1	B	gsB_R._leguminosarum_SM20_GCF_004305945.1_NZ_SIKG01000001.1_c3590339-3591819	C	C	C	C	G	G	G	-	G	G	C	C	C	T	C	-	A	G	T	T	A	T	A	T	A	-	A	12	b	b
420	SM5	GCF_004307025.1	B	gsB_R._leguminosarum_SM5_GCF_004307025.1_NZ_SIJS01000001.1_c3674437-3675917	C	C	C	C	G	G	G	-	G	G	C	C	C	T	C	-	A	G	T	T	A	T	A	T	A	-	A	12	b	b
421	SM14	GCF_004306875.1	B	gsB_R._leguminosarum_SM14_GCF_004306875.1_NZ_SIKA01000001.1_c3610487-3611967	C	C	C	C	G	G	G	-	G	G	C	C	C	T	C	-	A	G	T	T	A	T	A	T	A	-	A	12	b	b
422	SM18	GCF_004305935.1	B	gsB_R._leguminosarum_SM18_GCF_004305935.1_NZ_SIKE01000001.1_c3621343-3622823	C	C	C	C	G	G	G	-	G	G	C	C	C	T	C	-	A	G	T	T	A	T	A	T	A	-	A	12	b	b
423	SM19	GCF_004307135.1	B	gsB_R._leguminosarum_SM19_GCF_004307135.1_NZ_SIKF01000001.1_c3664699-3666179	C	C	C	C	G	G	G	-	G	G	C	C	C	T	C	-	A	G	T	T	A	T	A	T	A	-	A	12	b	b
424	SM25	GCF_004305625.1	B	gsB_R._leguminosarum_SM25_GCF_004305625.1_NZ_SIKK01000001.1_c3624051-3625531	C	C	C	C	G	G	G	-	G	G	C	C	C	T	C	-	A	G	T	T	A	T	A	T	A	-	A	12	b	b
425	SM27	GCF_004306355.1	B	gsB_R._leguminosarum_SM27_GCF_004306355.1_NZ_SIKL01000001.1_c3805658-3807138	C	C	C	C	G	G	G	-	G	G	C	C	C	T	C	-	A	G	T	T	A	T	A	T	A	-	A	12	b	b
426	SM16	GCF_004307045.1	B	gsB_R._leguminosarum_SM16_GCF_004307045.1_NZ_SIKC01000001.1_c3591731-3593211	C	C	C	C	G	G	G	-	G	G	C	C	C	T	C	-	A	G	T	T	A	T	A	T	A	-	A	12	b	b
427	SM6	GCF_004306925.1	B	gsB_R._leguminosarum_SM6_GCF_004306925.1_NZ_SIJT01000001.1_c3650764-3652244	C	C	C	C	G	G	G	-	G	G	C	C	C	T	C	-	A	G	T	T	A	T	A	T	A	-	A	12	b	b
428	SM15	GCF_004306815.1	B	gsB_R._leguminosarum_SM15_GCF_004306815.1_NZ_SIKB01000001.1_c3753176-3754656	C	C	C	C	G	G	G	-	G	G	C	C	C	T	C	-	A	G	T	T	A	T	A	T	A	-	A	12	b	b
429	SM21	GCF_004306835.1	B	gsB_R._leguminosarum_SM21_GCF_004306835.1_NZ_SIKH01000001.1_c3671090-3672570	C	C	C	C	G	G	G	-	G	G	C	C	C	T	C	-	A	G	T	T	A	T	A	T	A	-	A	12	b	b
430	SM10	GCF_004322895.1	B	gsB_R._leguminosarum_SM10_GCF_004322895.1_NZ_SIJW01000001.1_c3787054-3788534	C	C	C	C	G	G	G	-	G	G	C	C	C	T	C	-	A	G	T	T	A	T	A	T	A	-	A	12	b	b
431	SM38	GCF_004306065.1	B	gsB_R._leguminosarum_SM38_GCF_004306065.1_NZ_SIKT01000001.1_c3557215-3558695	C	C	C	C	G	G	G	-	G	G	C	C	C	T	C	-	A	G	T	T	A	T	A	T	A	-	A	12	b	b
432	SM24	GCF_004306755.1	B	gsB_R._leguminosarum_SM24_GCF_004306755.1_NZ_SIKJ01000001.1_c3620809-3622289	C	C	C	C	G	G	G	-	G	G	C	C	C	T	C	-	A	G	T	T	A	T	A	T	A	-	A	12	b	b
433	SM31	GCF_004306425.1	B	gsB_R._leguminosarum_SM31_GCF_004306425.1_NZ_SIKN01000001.1_c3570864-3572344	C	C	C	C	G	G	G	-	G	G	C	C	C	T	C	-	A	G	T	T	A	T	A	T	A	-	A	12	b	b
434	3841	GCF_000009265.1	B	R._leguminosarum_3841_GCF_000009265.1_NC_008380.1_63642-65122	C	C	C	C	G	G	G	-	G	G	C	C	C	T	C	-	A	G	T	T	A	T	A	T	A	-	A	12	b	b
435	JHI963	GCF_010668515.1	B	R._leguminosarum_JHI963_GCF_010668515.1_NZ_WUFG01000052.1_394-1874	C	C	C	C	G	G	G	-	G	G	C	C	C	T	C	-	A	G	T	T	A	T	A	T	A	-	A	12	b	b
436	SM30	GCF_004306225.1	B	gsB_R._leguminosarum_SM30_GCF_004306225.1_NZ_SIKM01000001.1_c3527990-3529470	C	C	C	C	G	G	G	-	G	G	C	C	C	T	C	-	A	G	T	T	A	T	A	T	A	-	A	12	b	b
437	SM40	GCF_004306785.1	B	gsB_R._leguminosarum_SM40_GCF_004306785.1_NZ_SIKV01000001.1_c3717486-3718966	C	C	C	C	G	G	G	-	G	G	C	C	C	T	C	-	A	G	T	T	A	T	A	T	A	-	A	12	b	b
438	SM35	GCF_004306175.1	B	gsB_R._leguminosarum_SM35_GCF_004306175.1_NZ_SIKQ01000001.1_c3610698-3612178	C	C	C	C	G	G	G	-	G	G	C	C	C	T	C	-	A	G	T	T	A	T	A	T	A	-	A	12	b	b
439	JHI960	GCA_010668545.1	B	R._leguminosarum_JHI960_GCA_010668545.1_WUFH01000103.1_394-1874	C	C	C	C	G	G	G	-	G	G	C	C	C	T	C	-	A	G	T	T	A	T	A	T	A	-	A	12	b	b
440	SM37	GCF_004306455.1	B	gsB_R._leguminosarum_SM37_GCF_004306455.1_NZ_SIKS01000001.1_c3518461-3519941	C	C	C	C	G	G	G	-	G	G	C	C	C	T	C	-	A	G	T	T	A	T	A	T	A	-	A	12	b	b

[truncated: 2 more sheets: Table S10, Table 11]
